# Supplementary material
Source: publisher figshare collection journal article supplement (https://gsajournals.figshare.com/articles/dataset/_/22584583)

# Classification - Number of Replicates

## AFT

## HFT

1k Reps

PR Curve

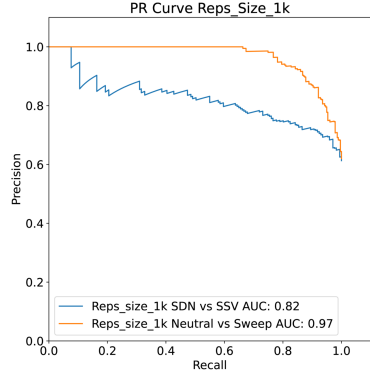

ROC Curve

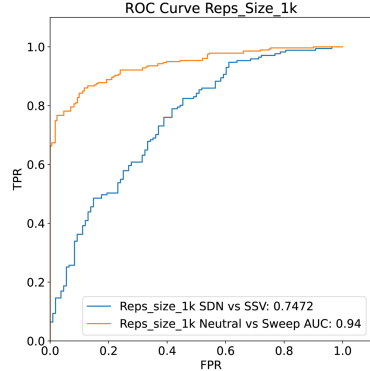

Normalized Confusion Matrix

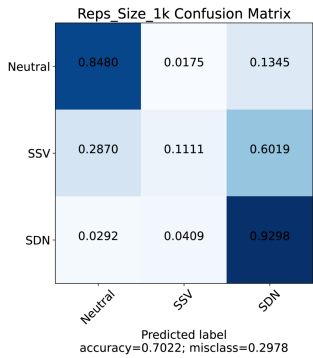

Confusion Matrix

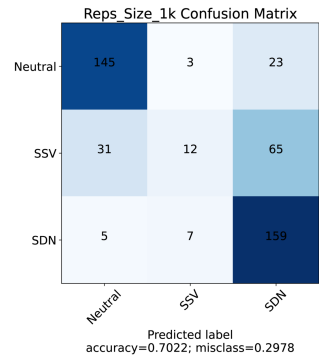

Training

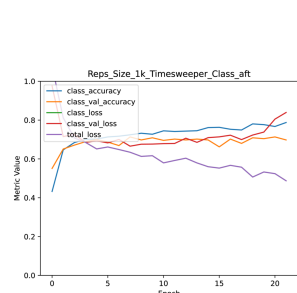

PR Curve

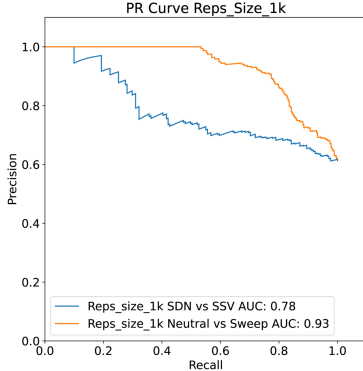

ROC Curve

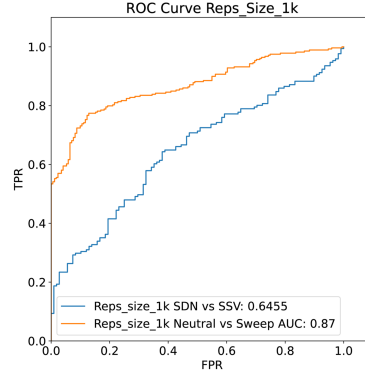

Normalized Confusion Matrix

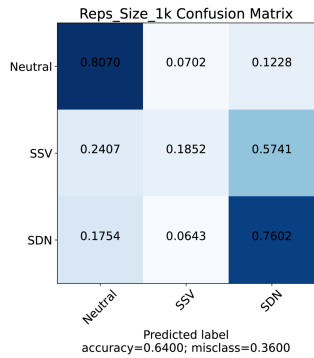

Confusion Matrix

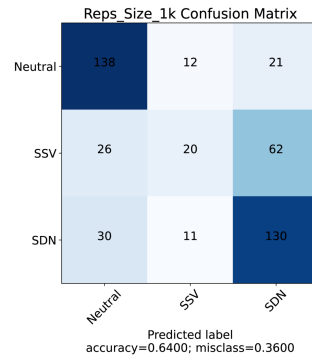

Training

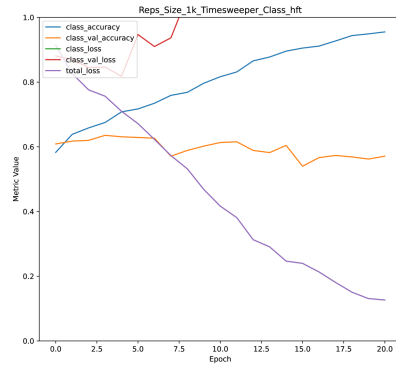

2k Reps

PR Curve

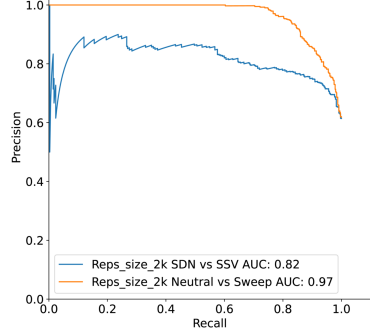

ROC Curve

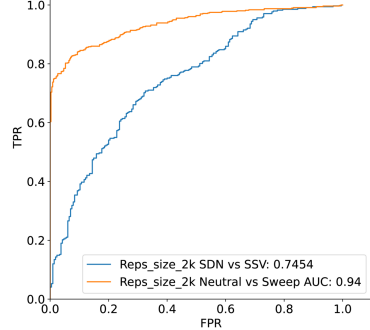

Normalized Confusion Matrix

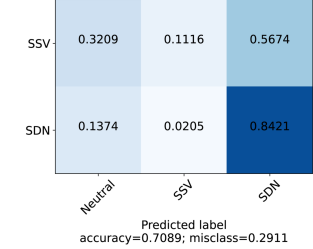

Confusion Matrix

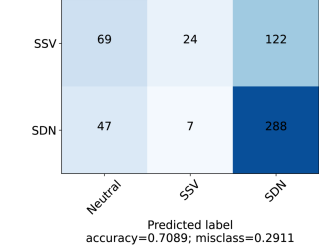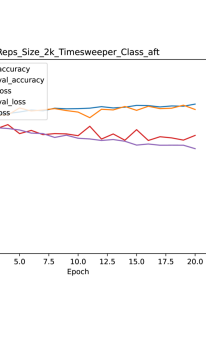

PR Curve

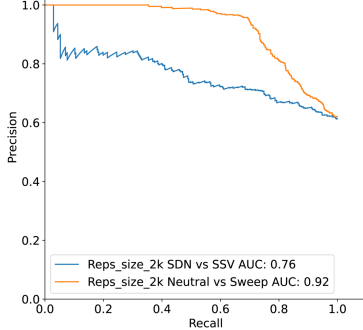

ROC Curve

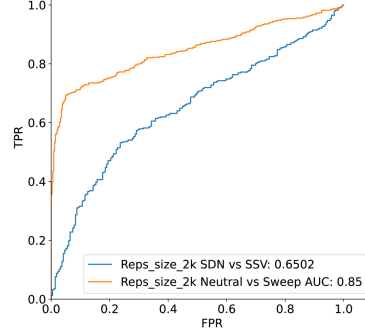

Normalized Confusion Matrix

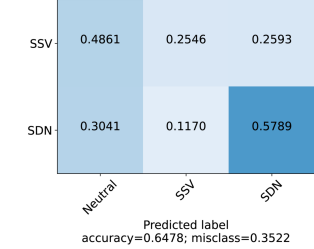

Confusion Matrix

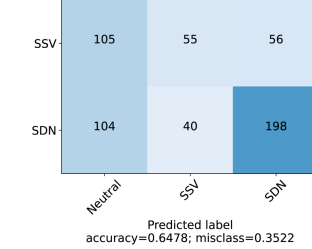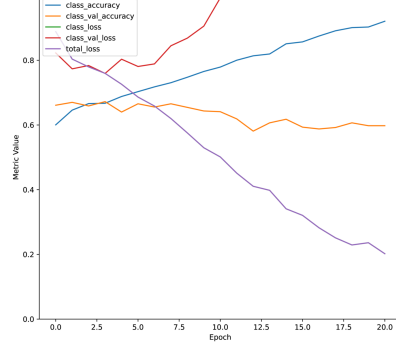

5k Reps

PR Curve

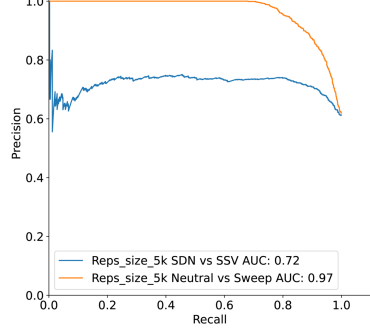

ROC Curve

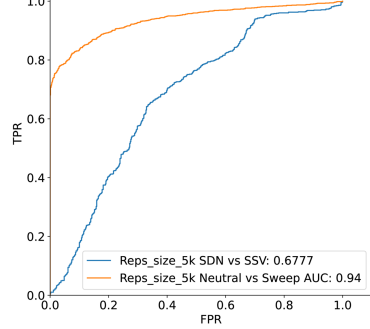

Normalized Confusion Matrix

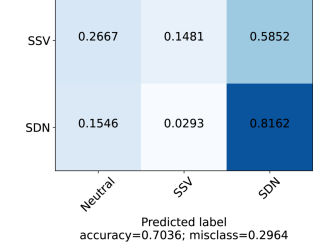

Confusion Matrix

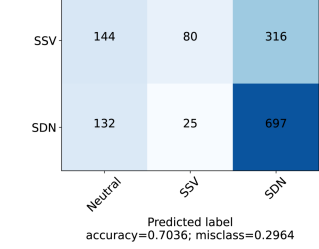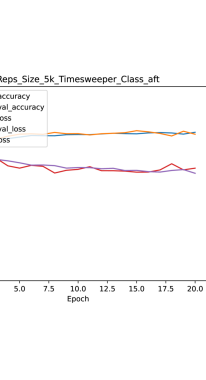

PR Curve

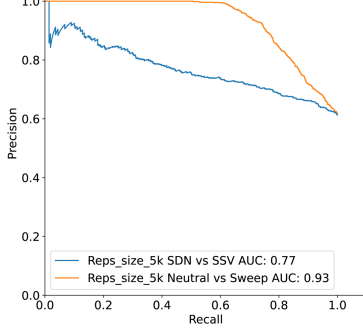

ROC Curve

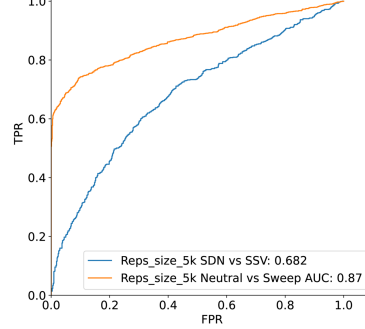

Normalized Confusion Matrix

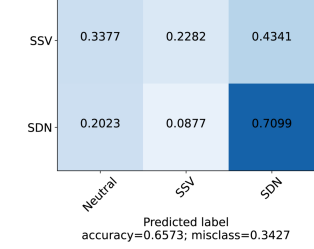

Confusion Matrix

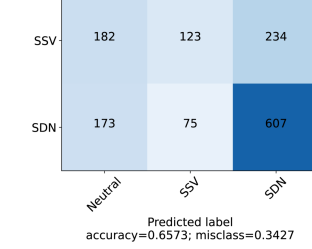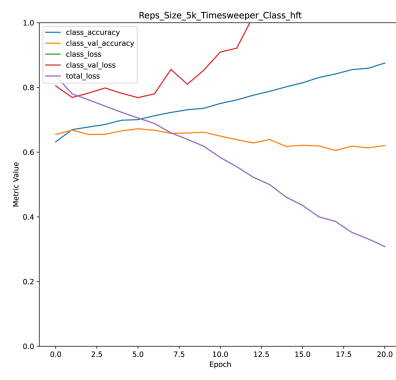

10k Reps

PR Curve

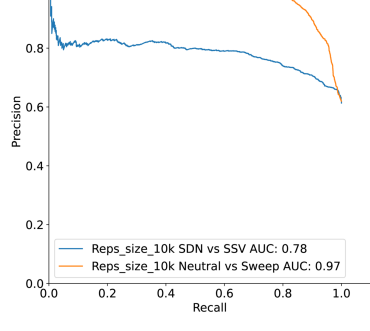

ROC Curve

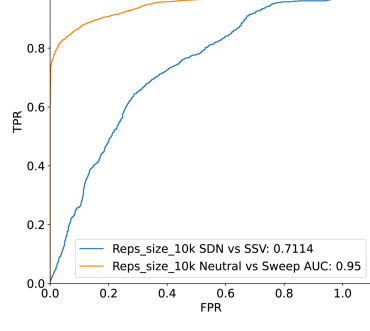

Normalized Confusion Matrix

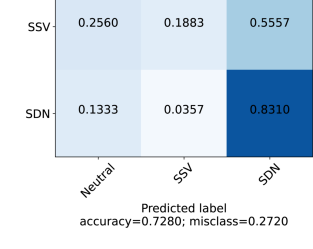

Confusion Matrix

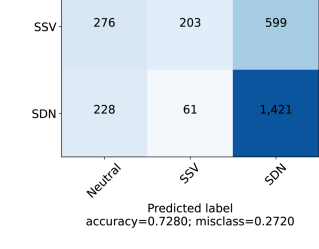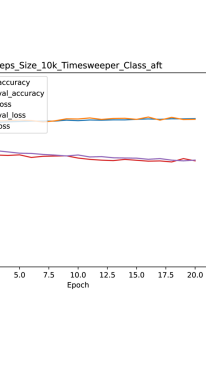

PR Curve

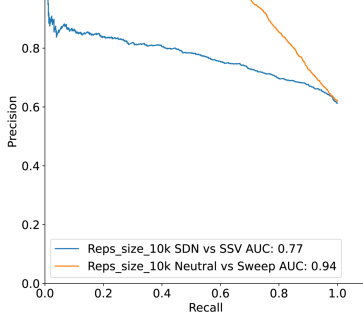

ROC Curve

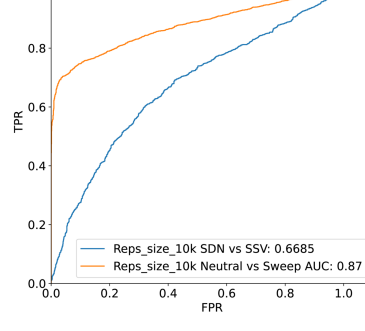

Normalized Confusion Matrix

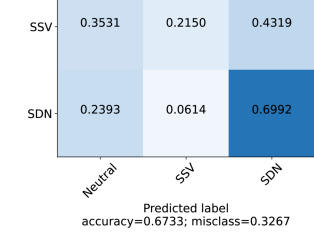

Confusion Matrix

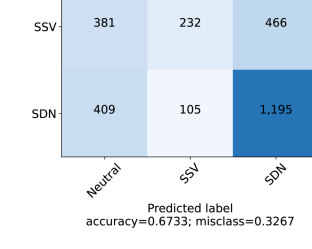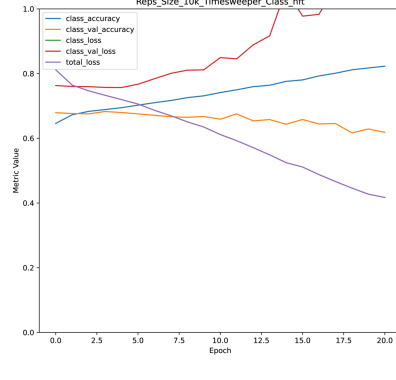

20k Reps

PR Curve

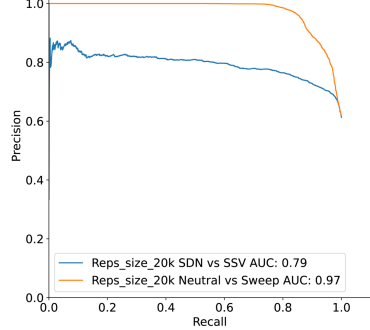

ROC Curve

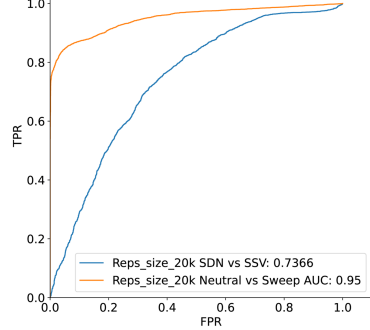

Normalized Confusion Matrix

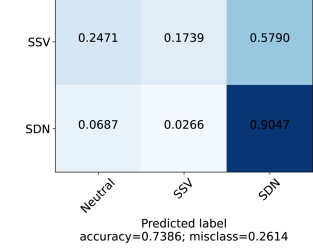

Confusion Matrix

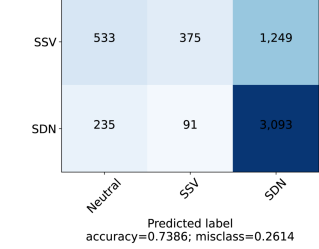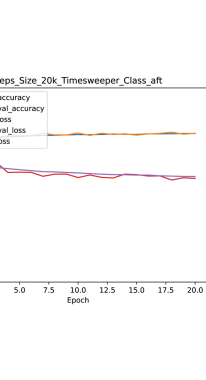

PR Curve

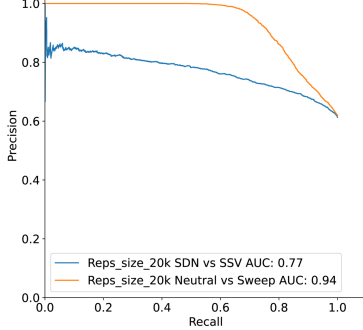

ROC Curve

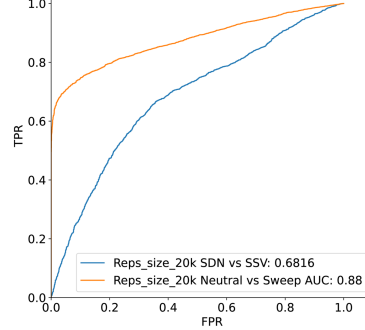

Normalized Confusion Matrix

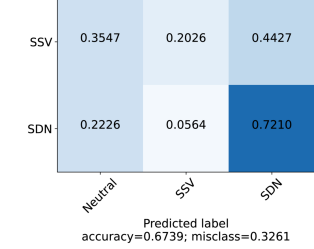

Confusion Matrix

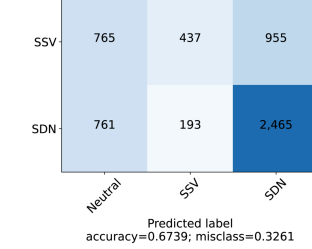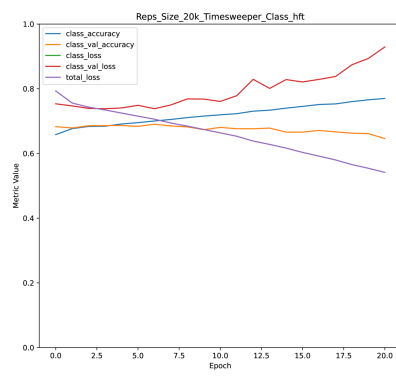

30k Reps

PR Curve

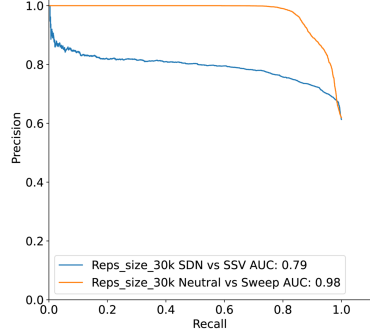

ROC Curve

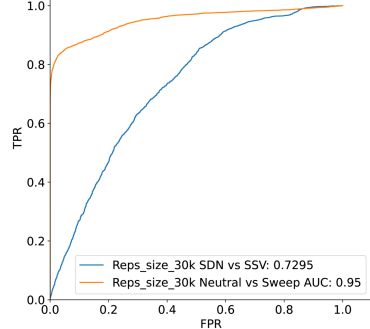

Normalized Confusion Matrix

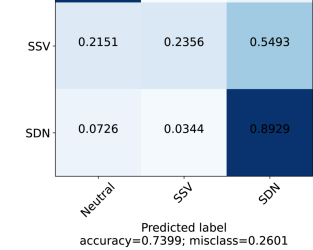

Confusion Matrix

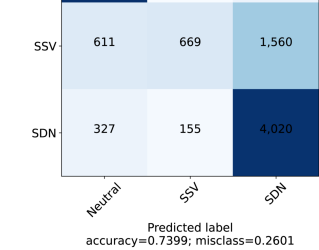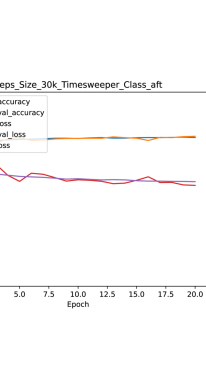

PR Curve

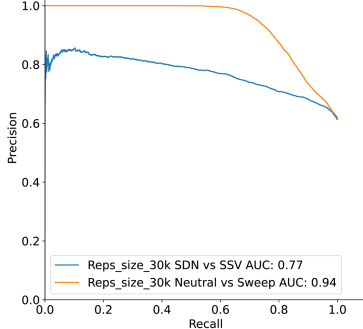

ROC Curve

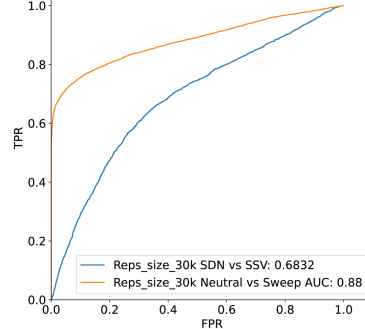

Normalized Confusion Matrix

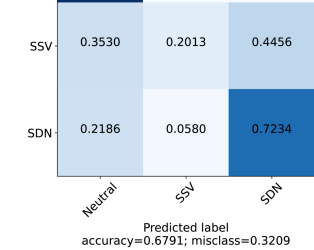

Confusion Matrix

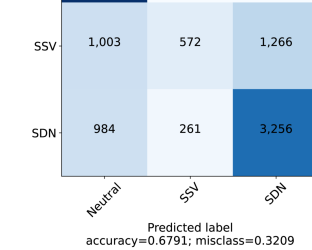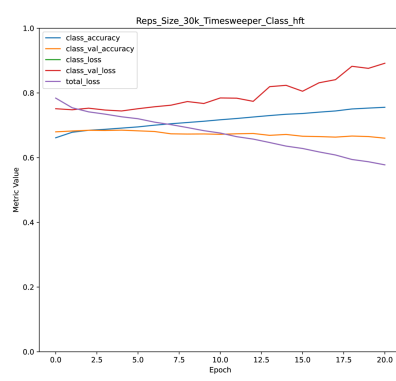

Supplement: Supplementary file 8 [file 1]
