# Supplementary material
Source: publisher figshare collection journal article supplement (https://gsajournals.figshare.com/articles/dataset/_/22584583)

# Classification - Varying Timepoints

## AFT

## HFT

1 Timepoint

PR Curve

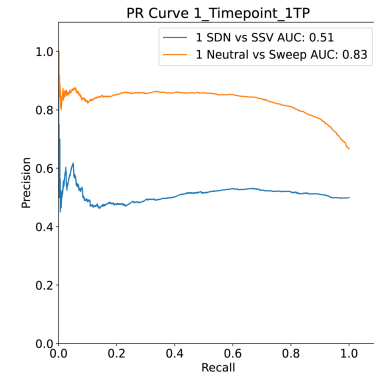

ROC Curve

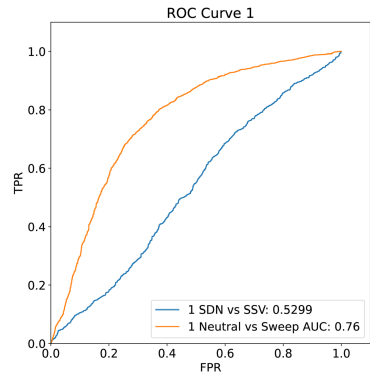

Normalized Confusion Matrix

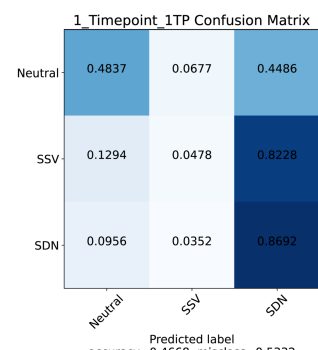

Confusion Matrix

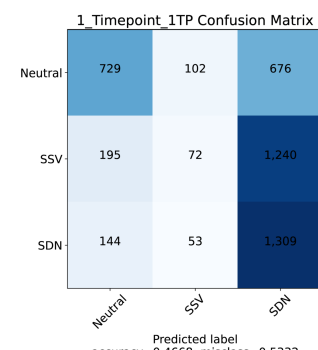

Training

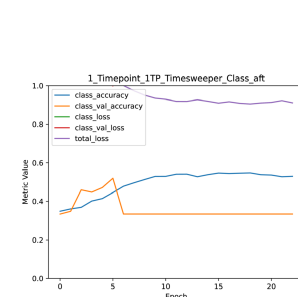

PR Curve

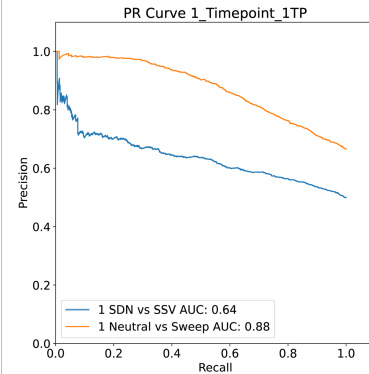

ROC Curve

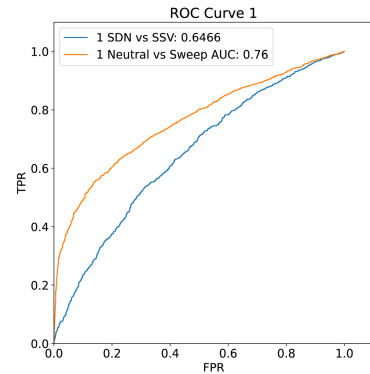

Normalized Confusion Matrix

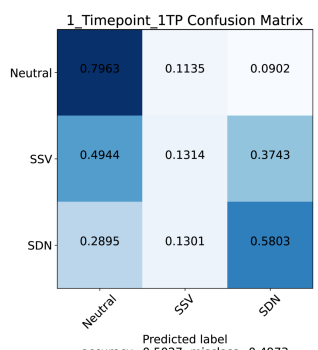

Confusion Matrix

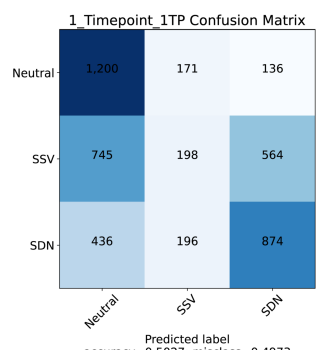

Training

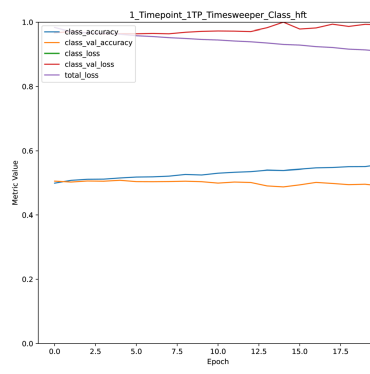

2 Timepoints

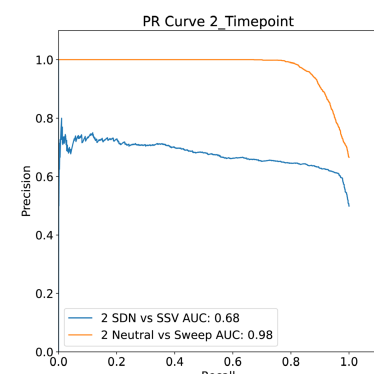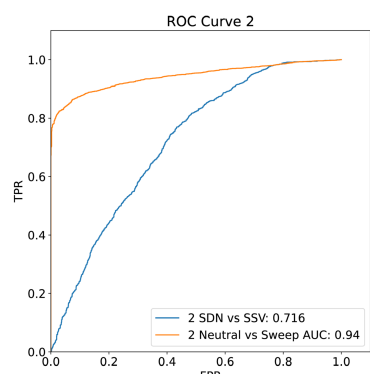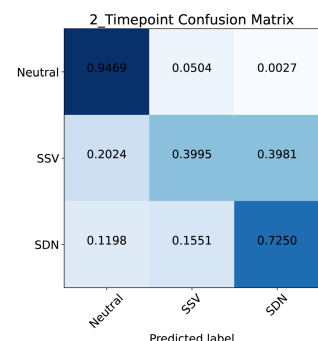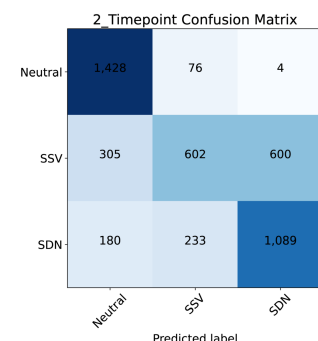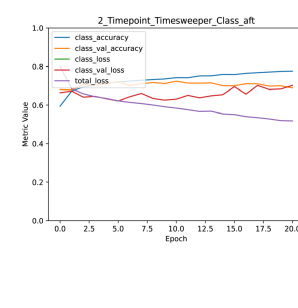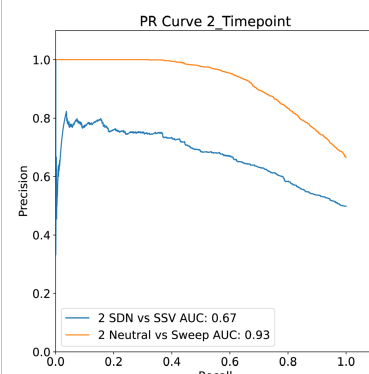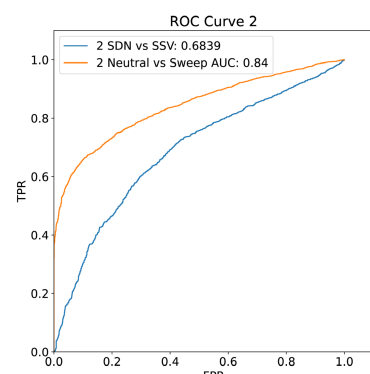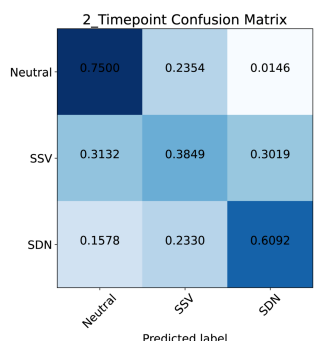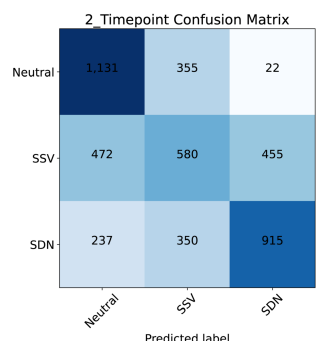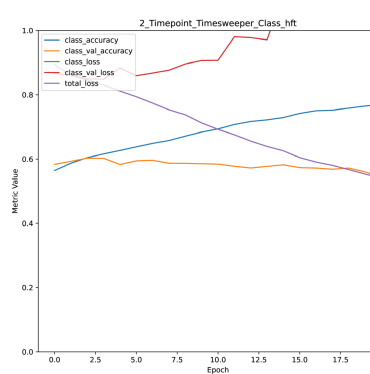

5 Timepoints

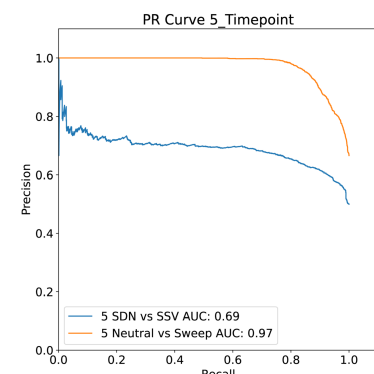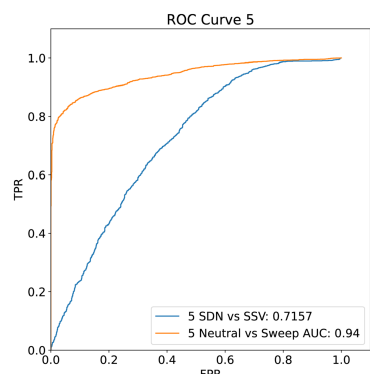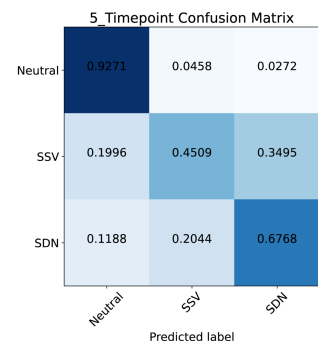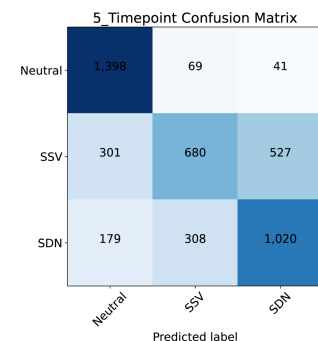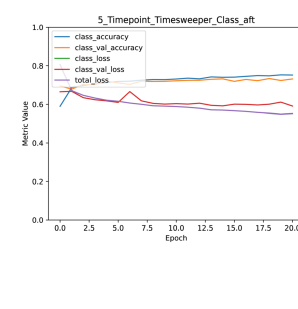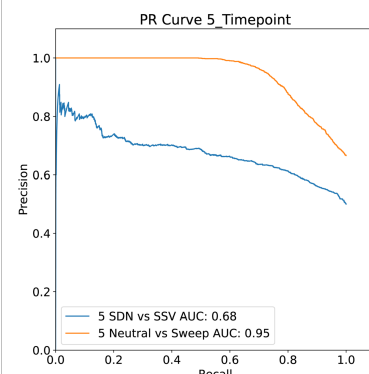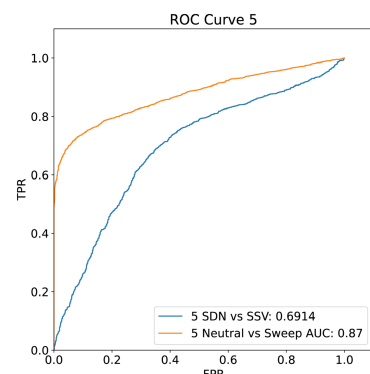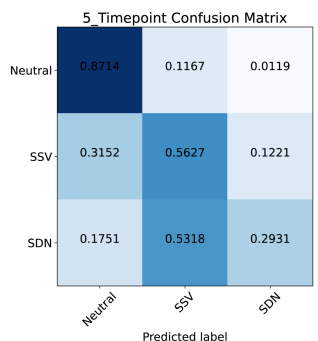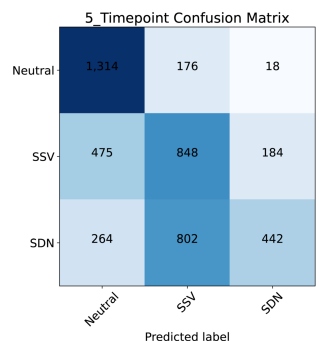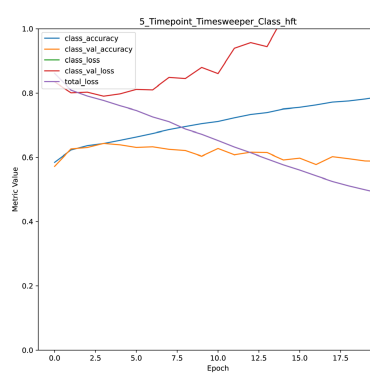

10 Timepoints

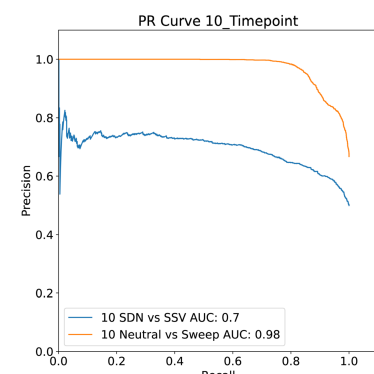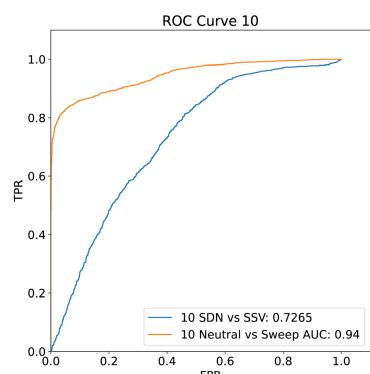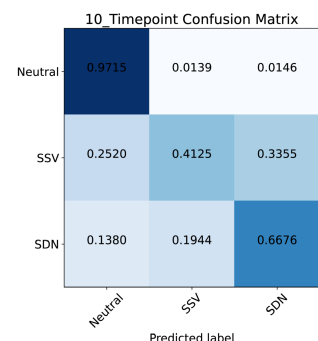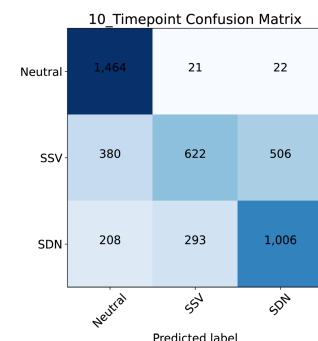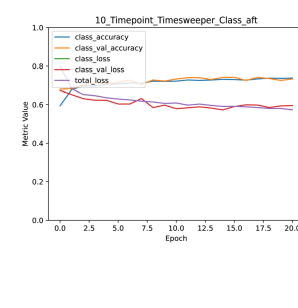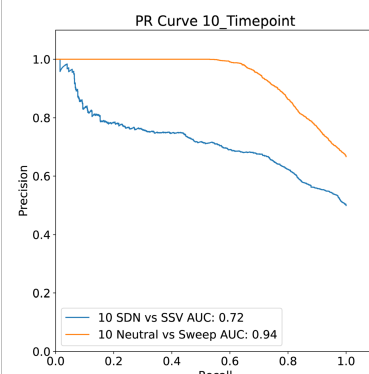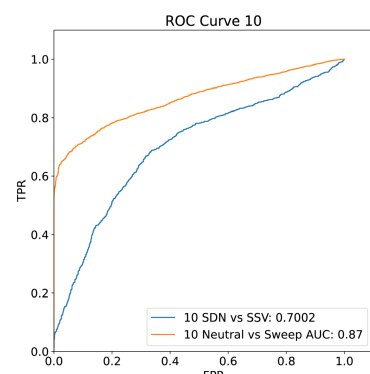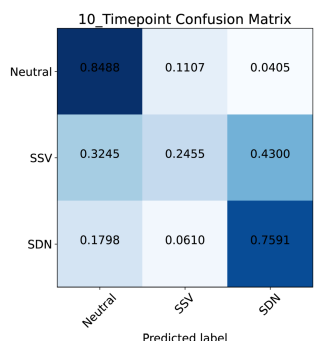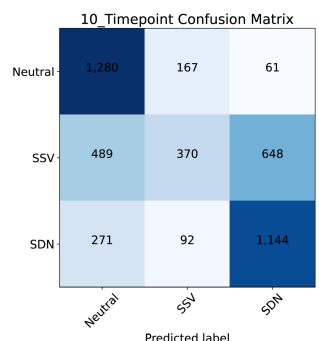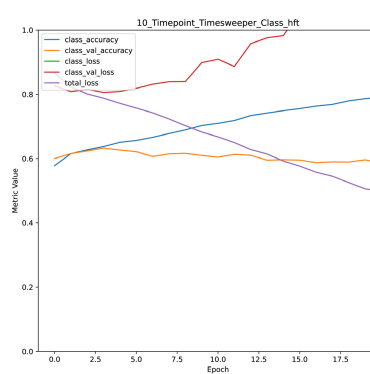

20 Timepoints

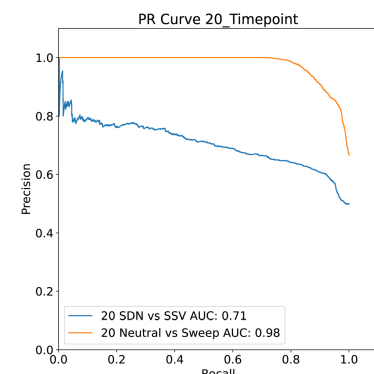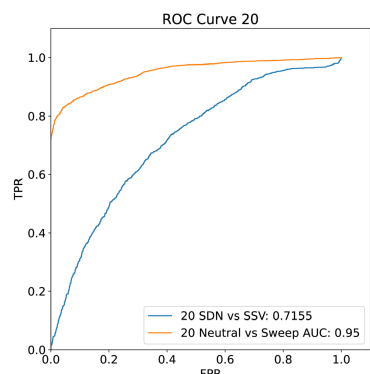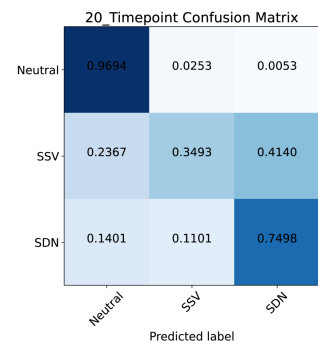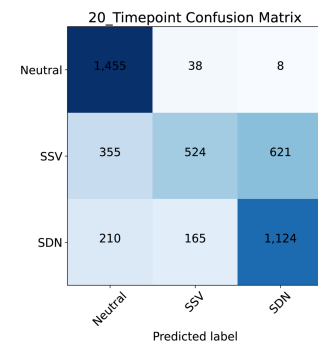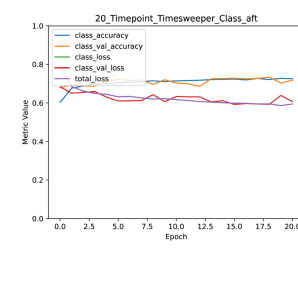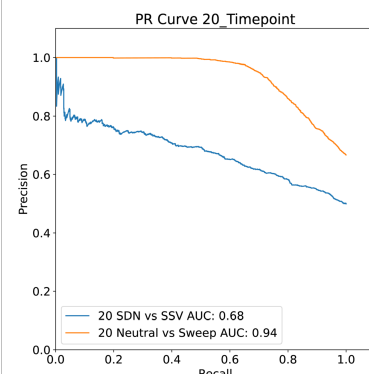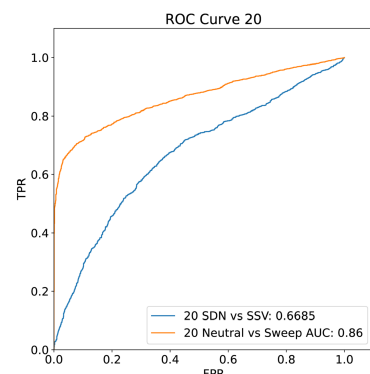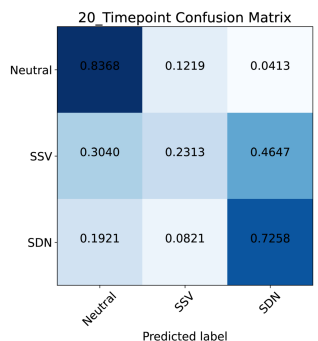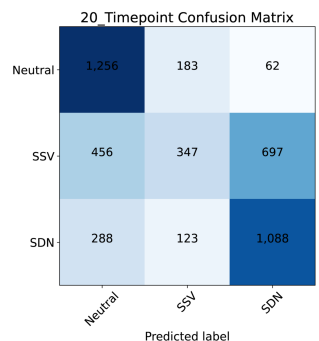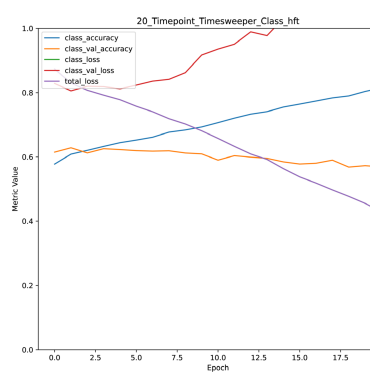

40 Timepoints

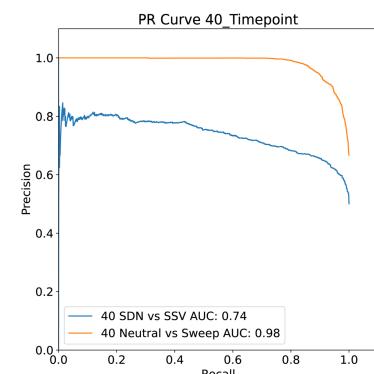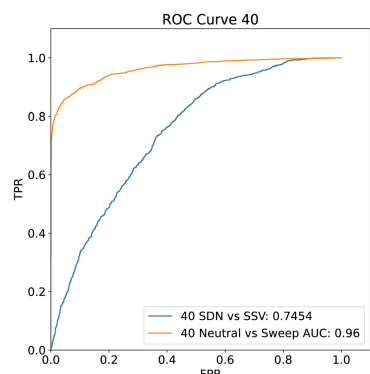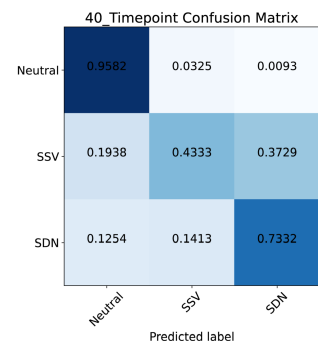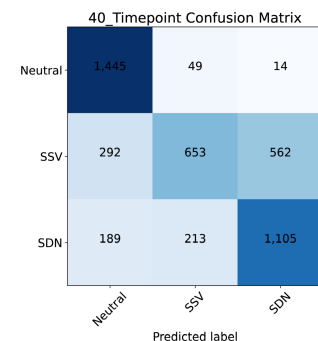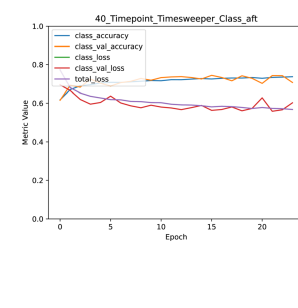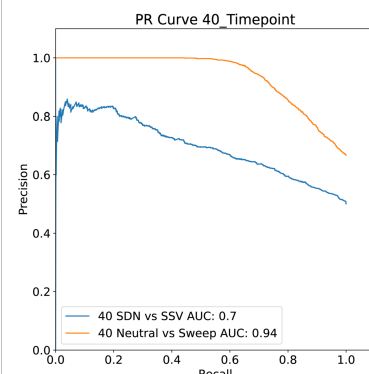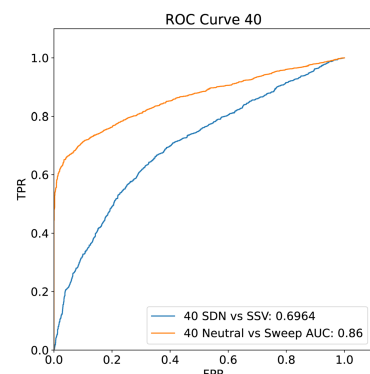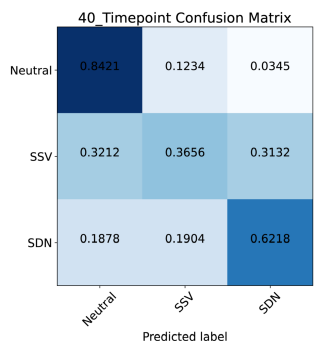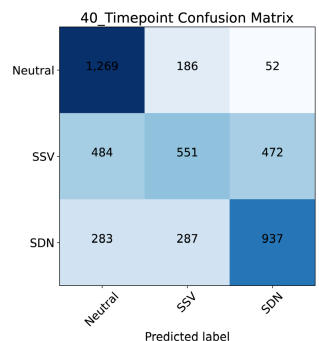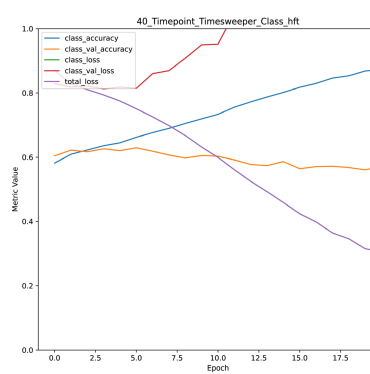

Supplement: Supplementary file 13 [file 1]
