# Supplementary material
Source: publisher figshare collection journal article supplement (https://gsajournals.figshare.com/articles/dataset/_/22584583)

# Regression - Selection Timing

AFT

HFT

SDN

SSV

SDN Training Loss

SSV Training Loss

SDN

SSV

SDN Training Loss

SSV Training Loss

-100 Gens

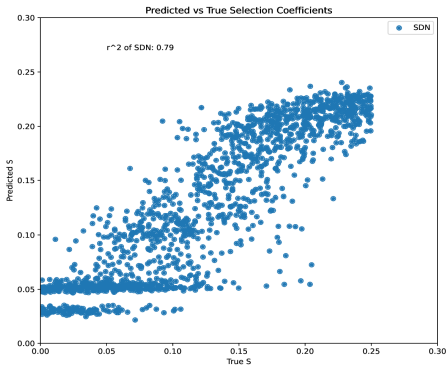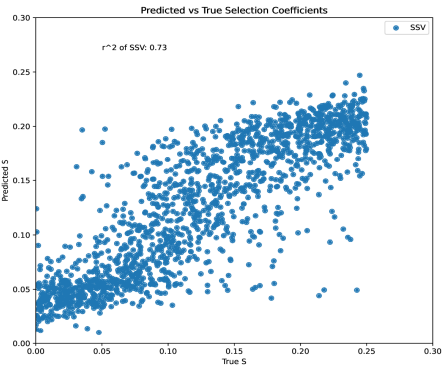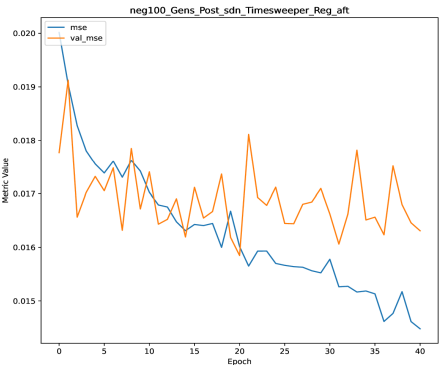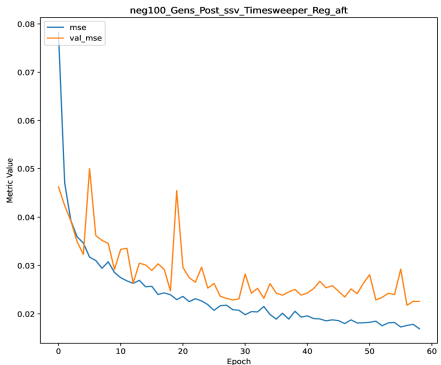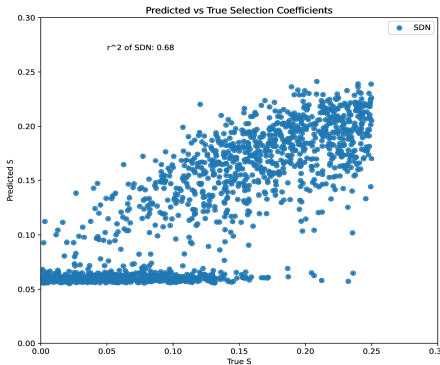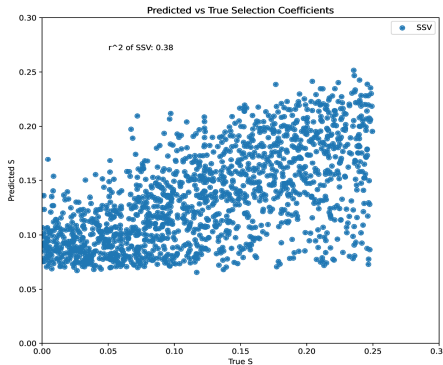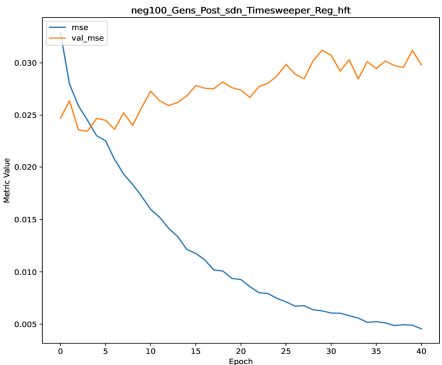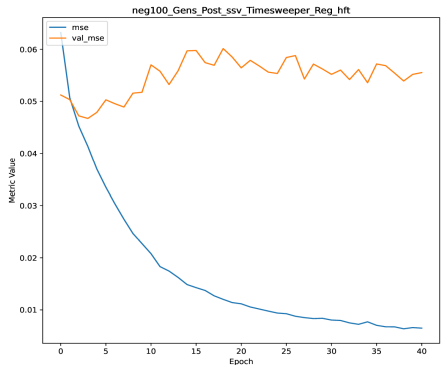

-50 Gens

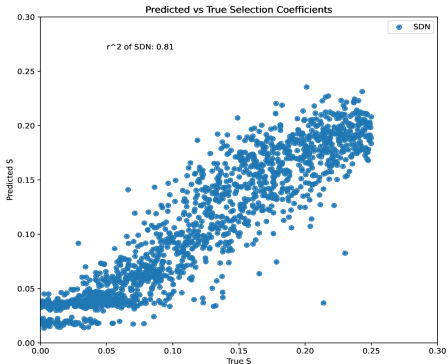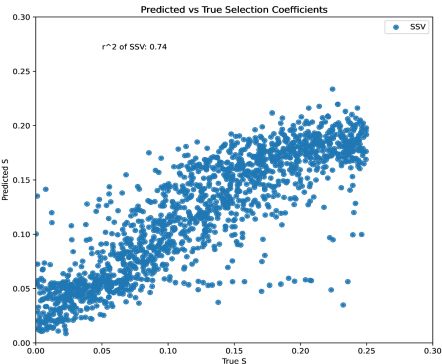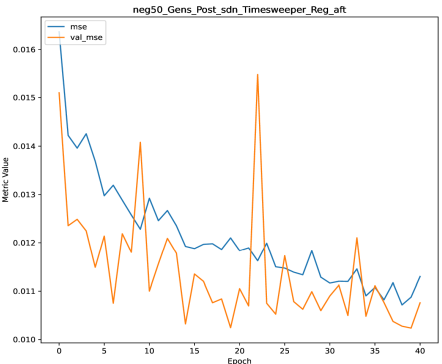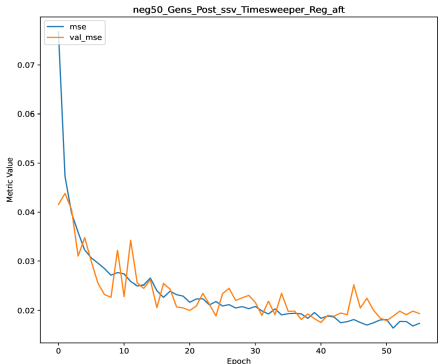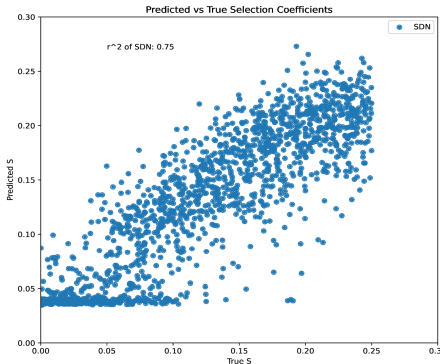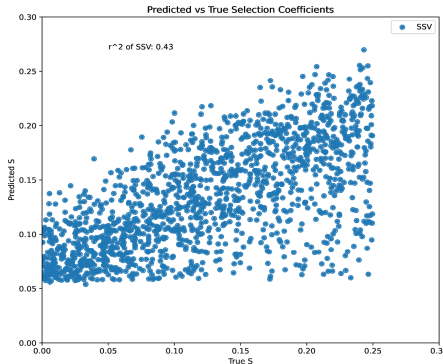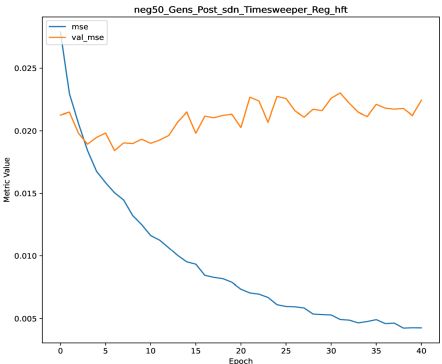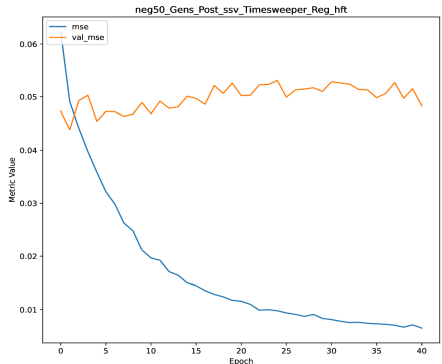

0 Gens

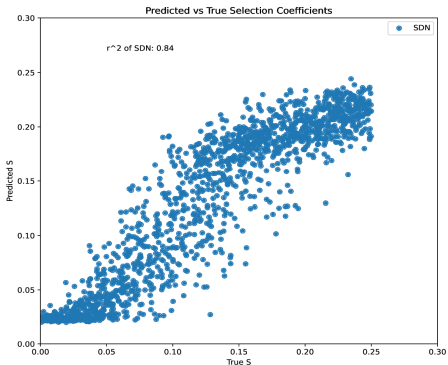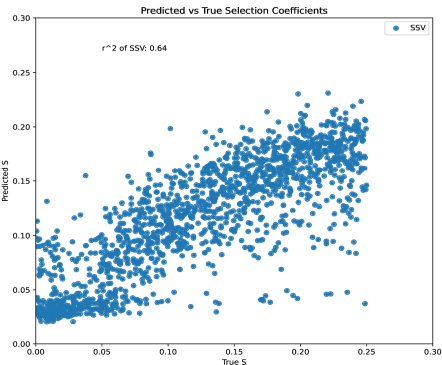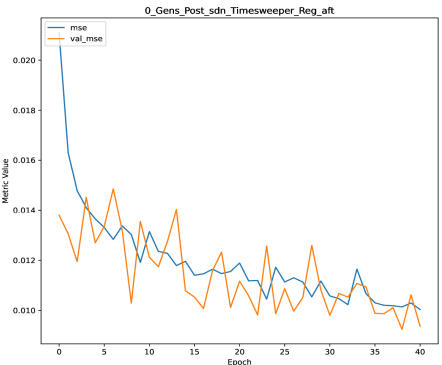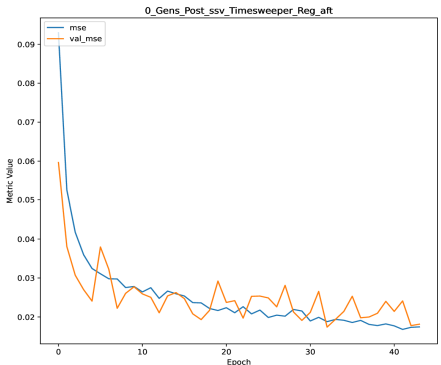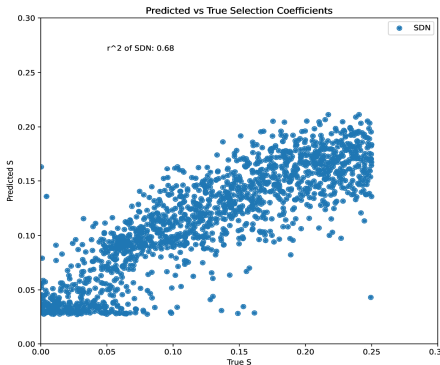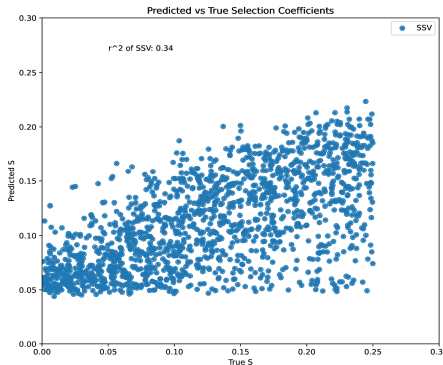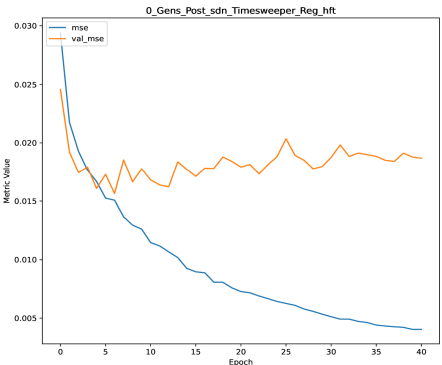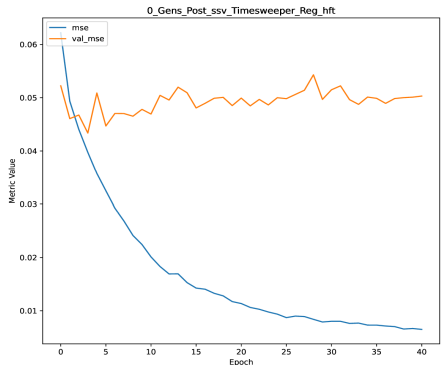

25 Gens

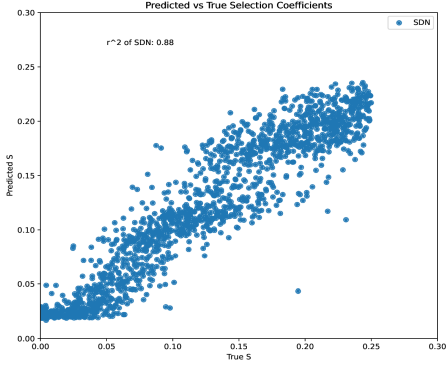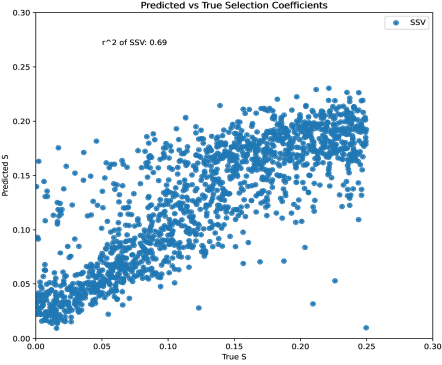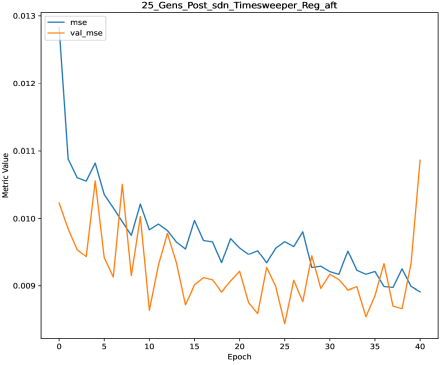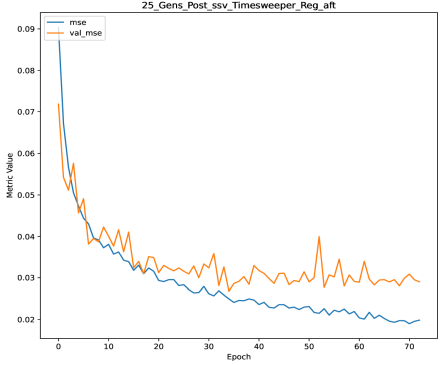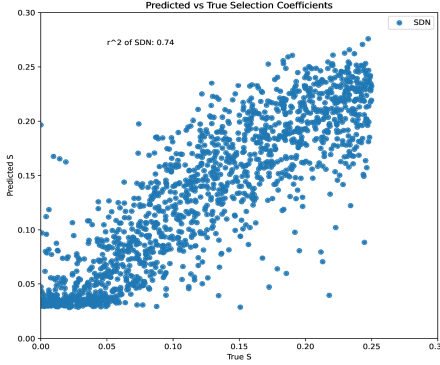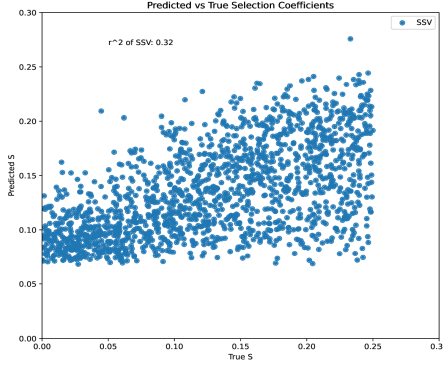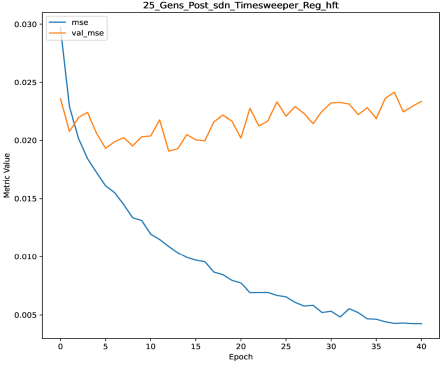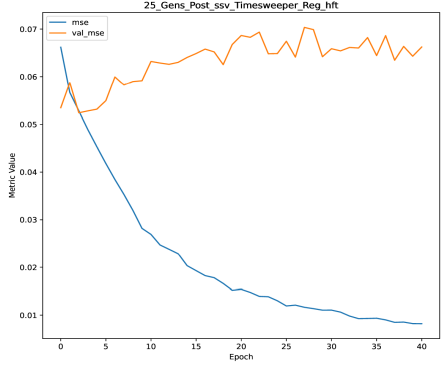

50 Gens

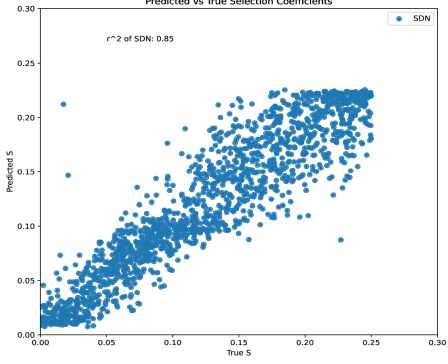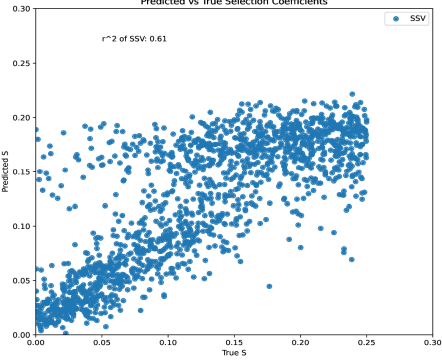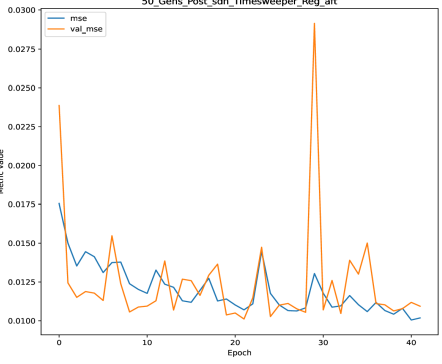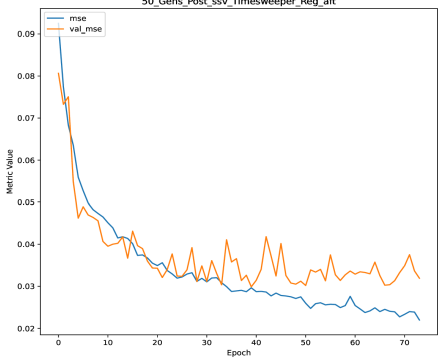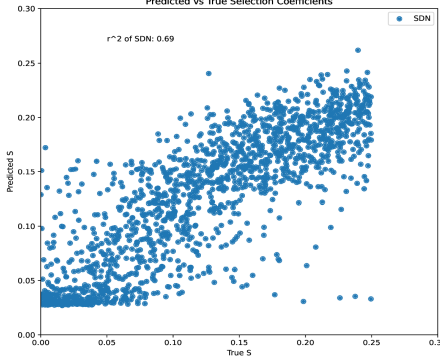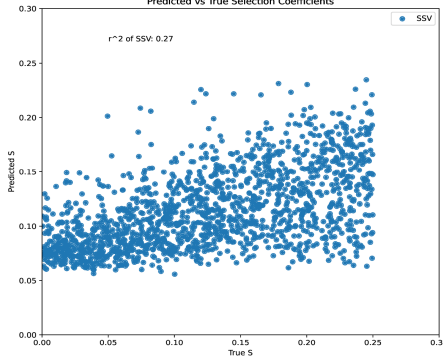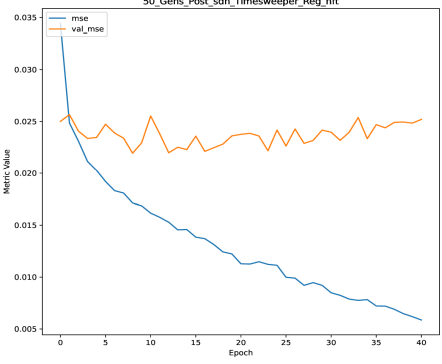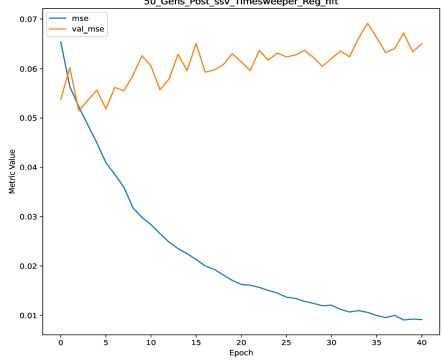

100 Gens

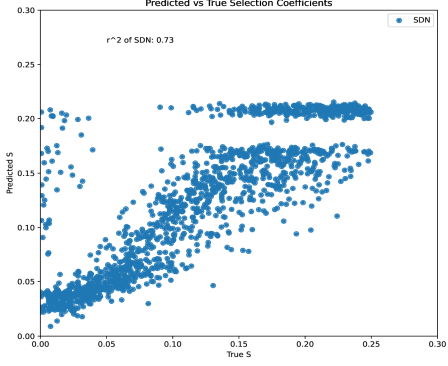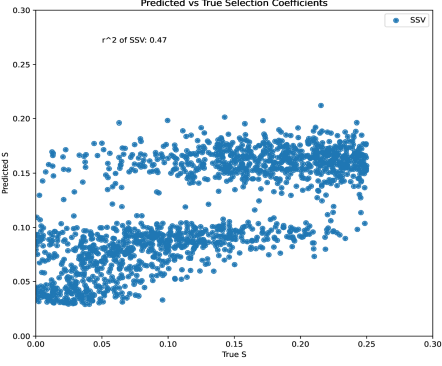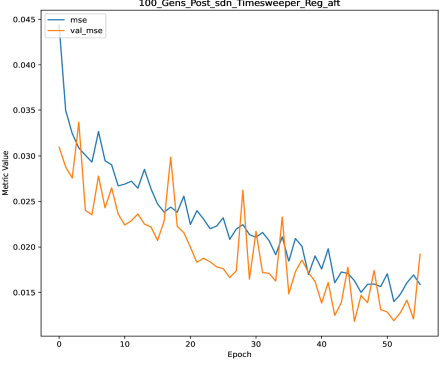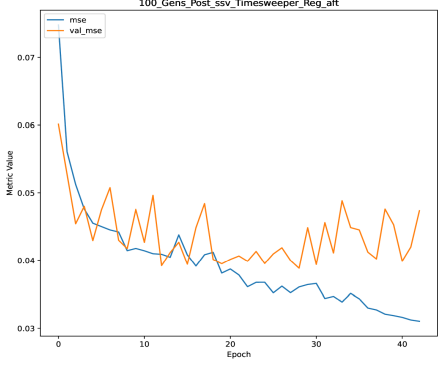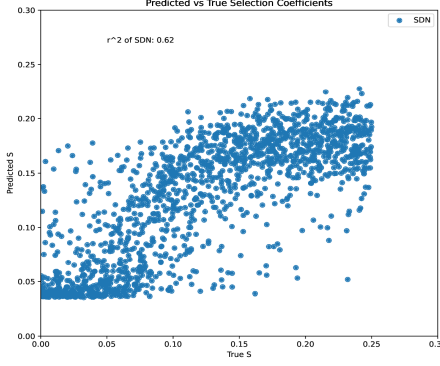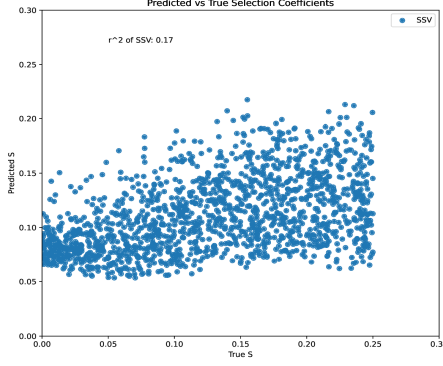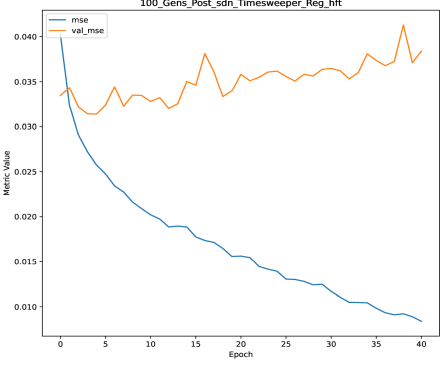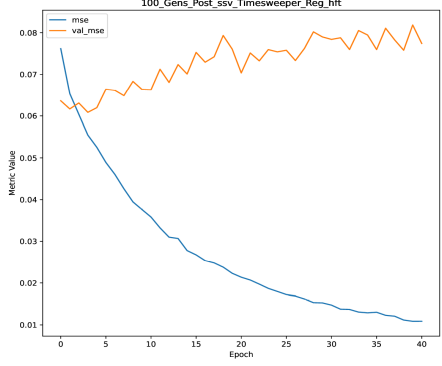

200 Gens

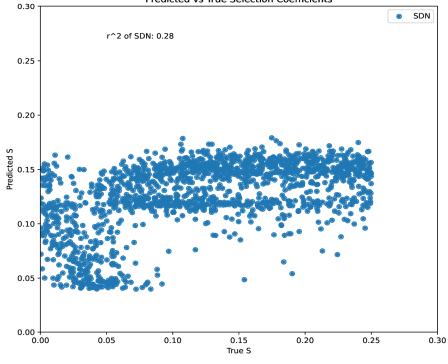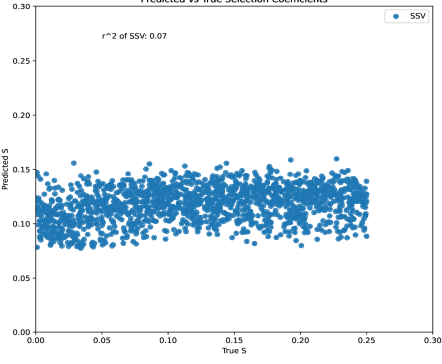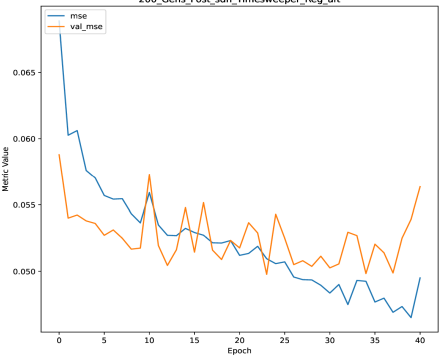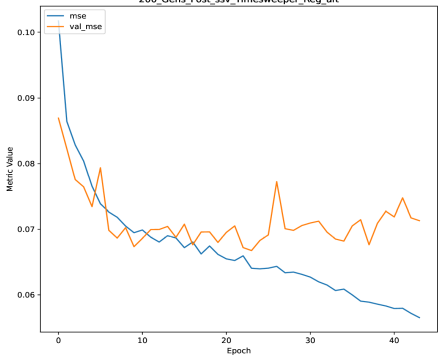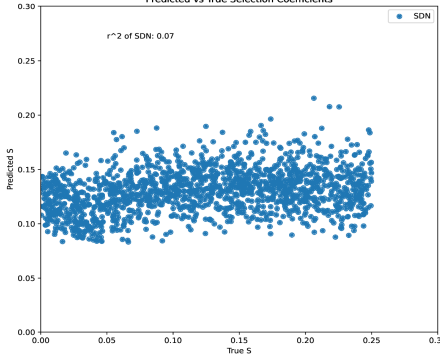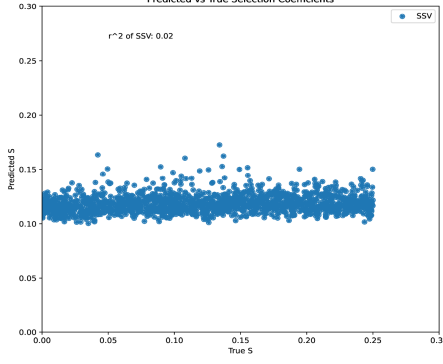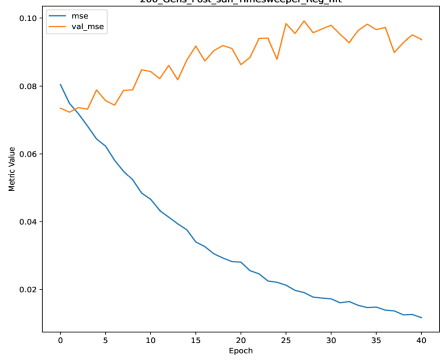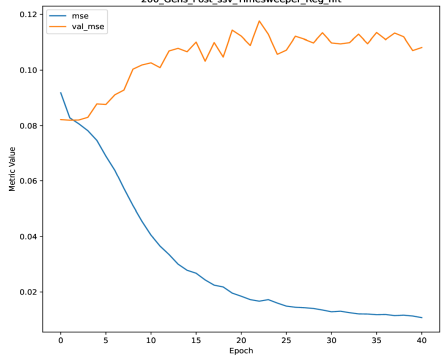

Supplement: Supplementary file 24 [file 1]
