# Supplementary material
Source: publisher figshare collection journal article supplement (https://gsajournals.figshare.com/articles/dataset/_/22584583)

# Regression - Architectures

AFT

HFT

SDN

SSV

SDN Training

SSV Training

SDN

SSV

SDN Training

SSV Training

1DCNN

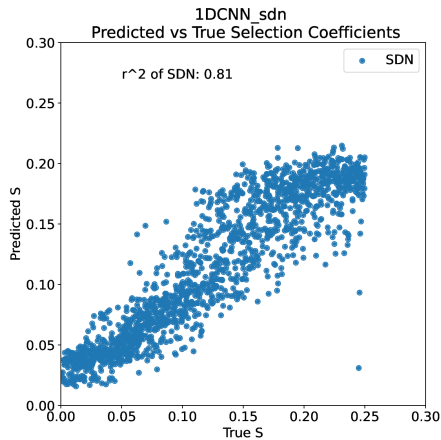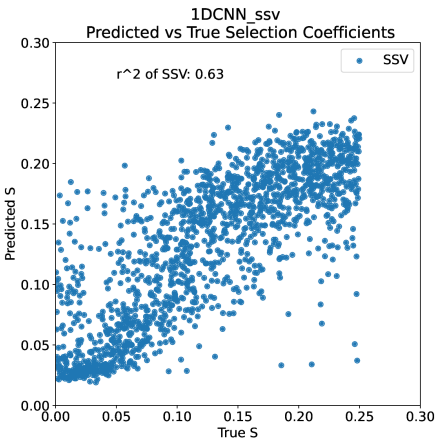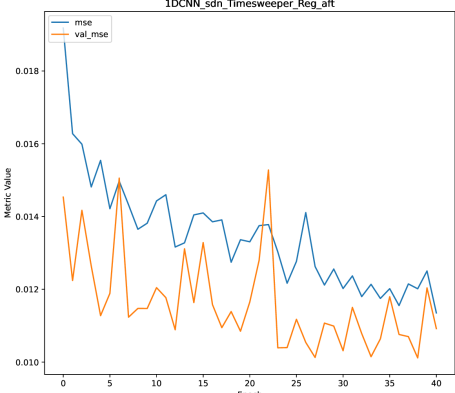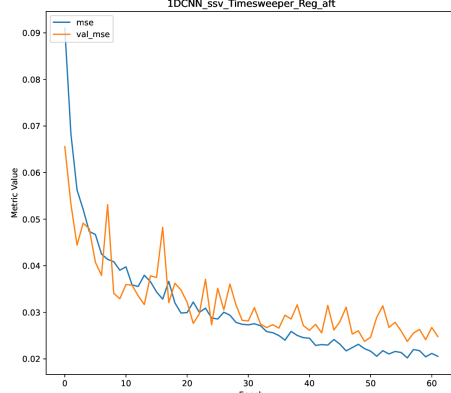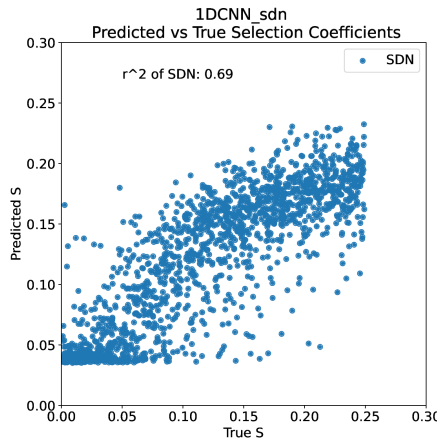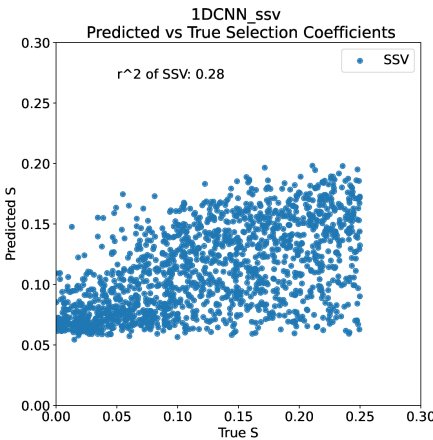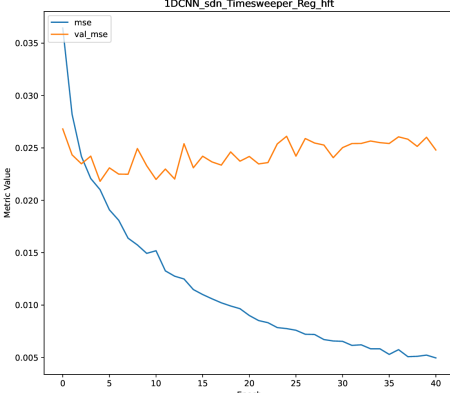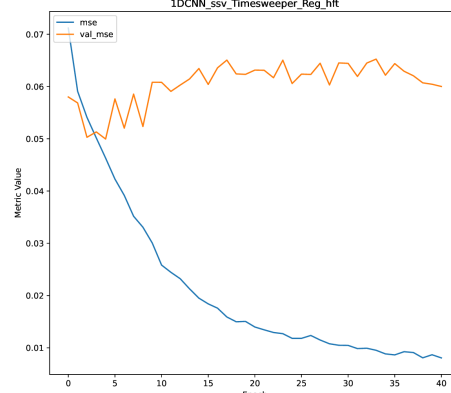

Big 1DCNN

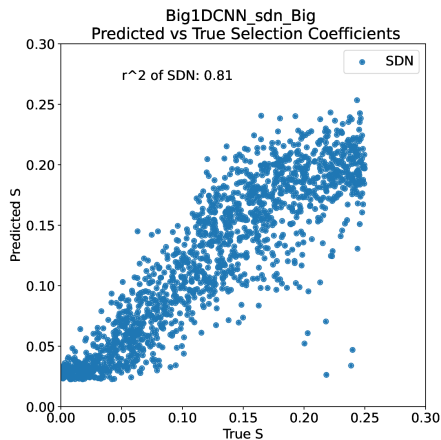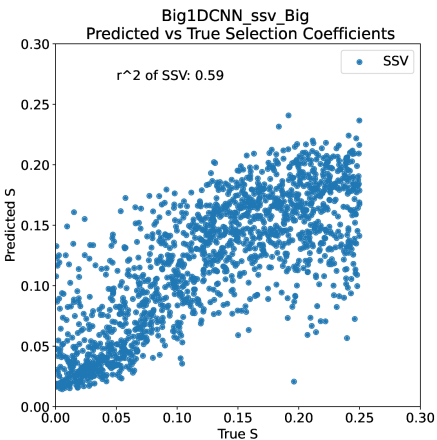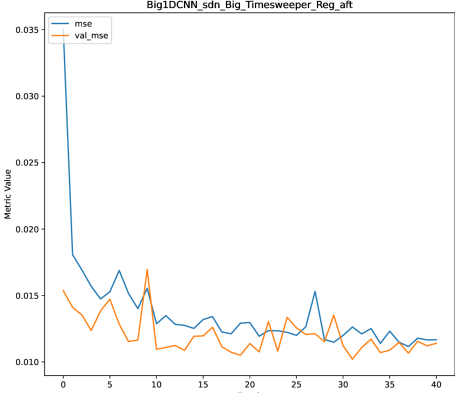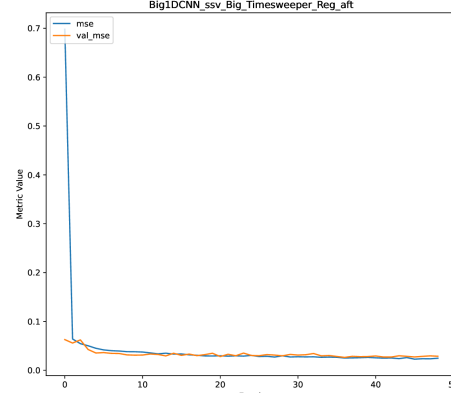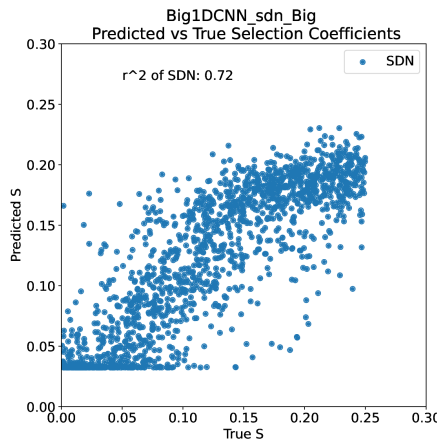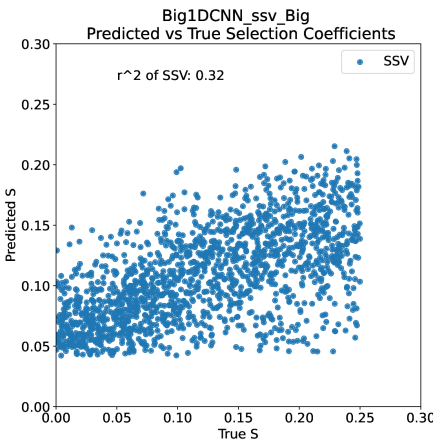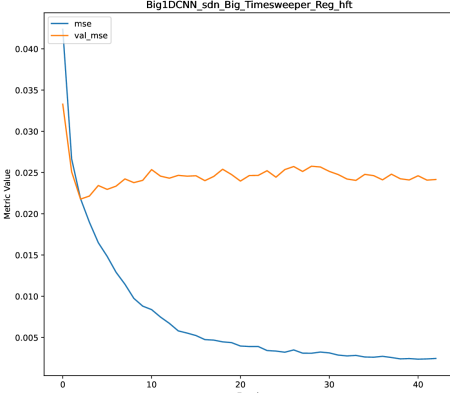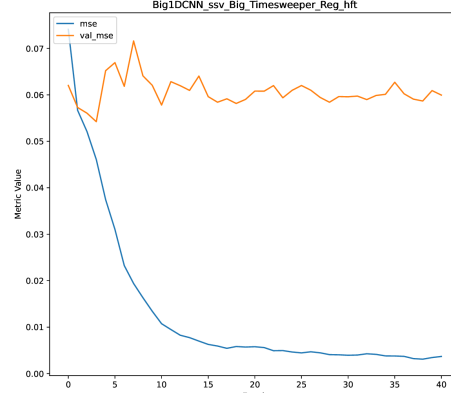

2DCNN

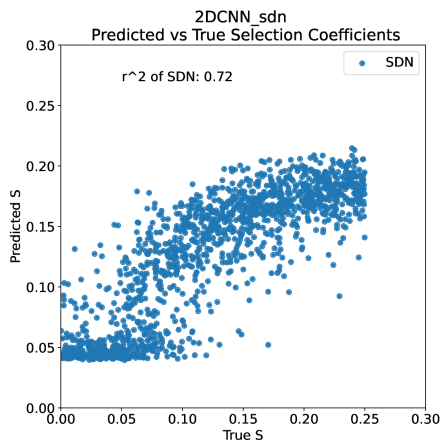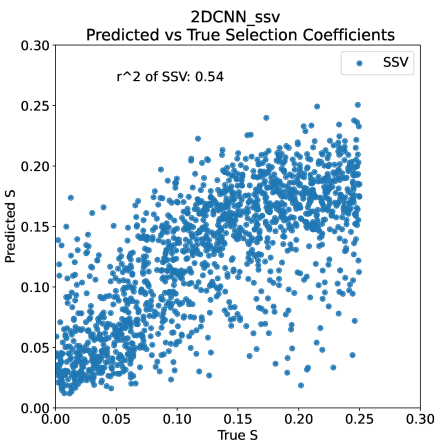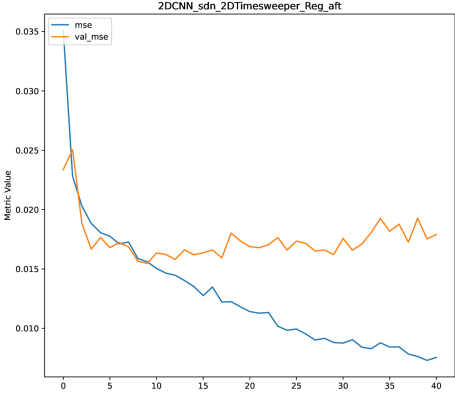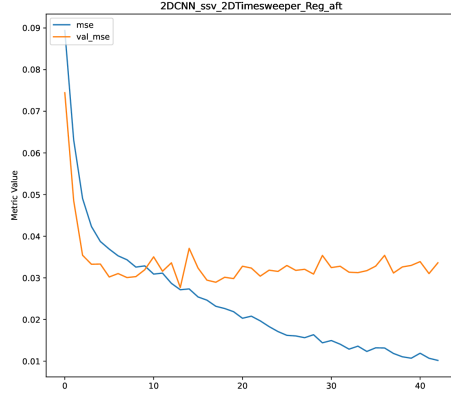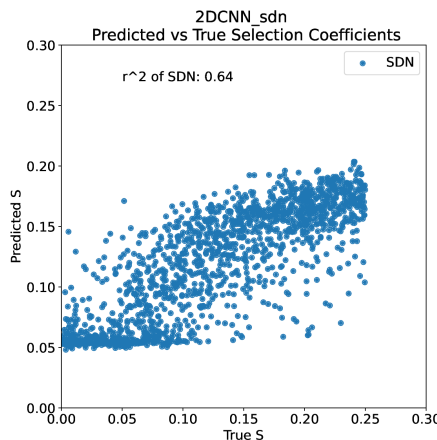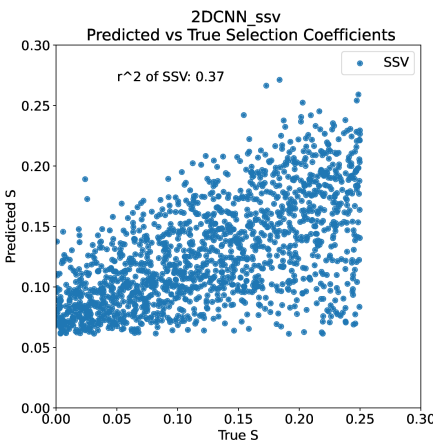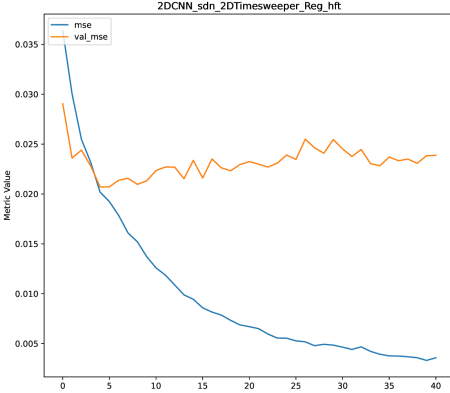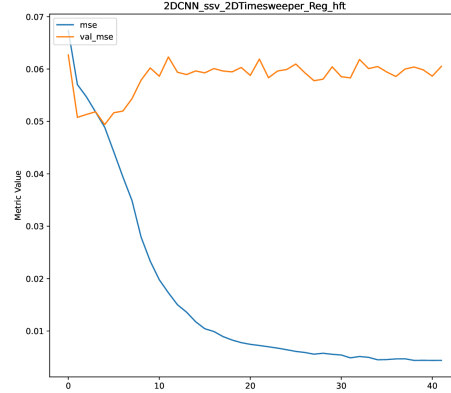

RNN

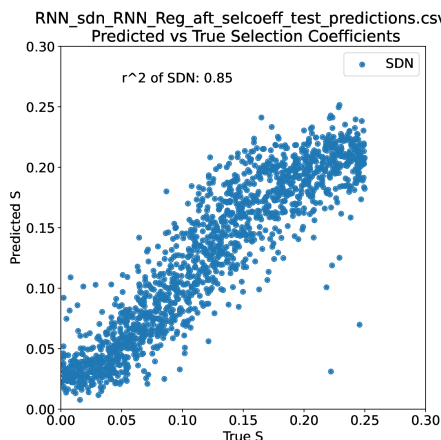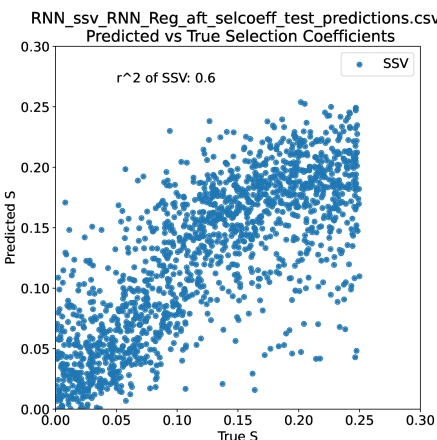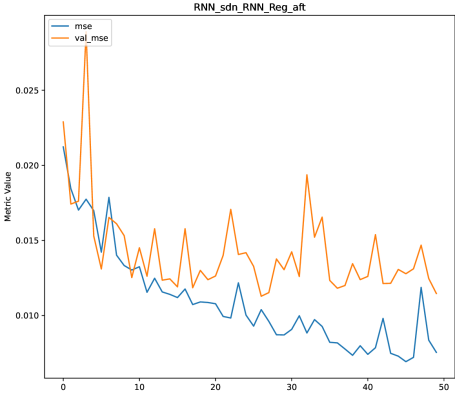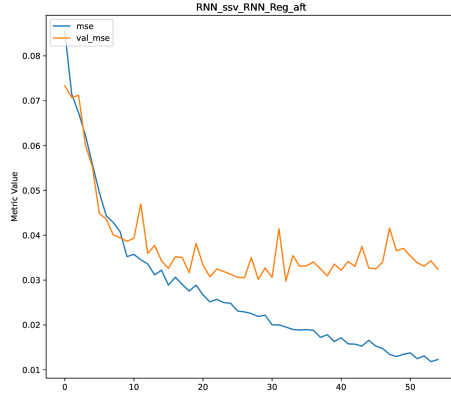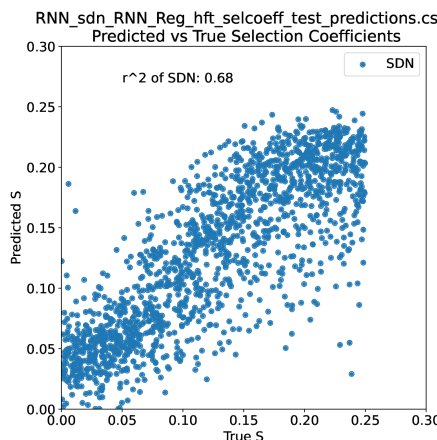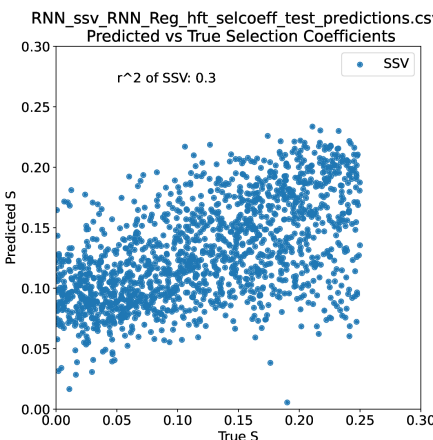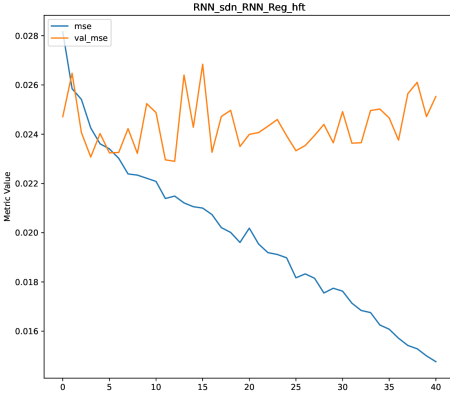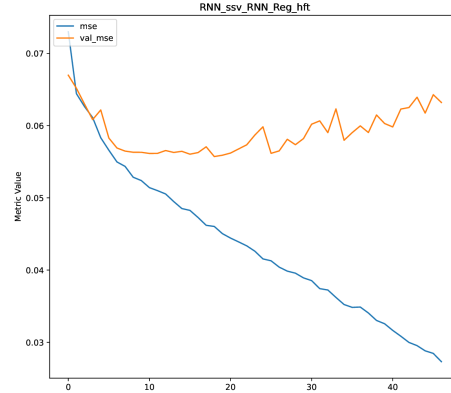

Supplement: Supplementary file 10 [file 1]
