# Supplementary material
Source: publisher figshare collection journal article supplement (https://gsajournals.figshare.com/articles/dataset/_/22584583)

# Classification - Selection Timing

## AFT

## HFT

-100 Gens

PR Curve

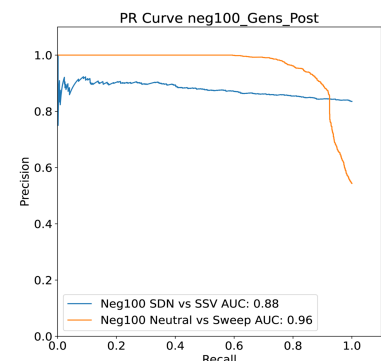

ROC Curve

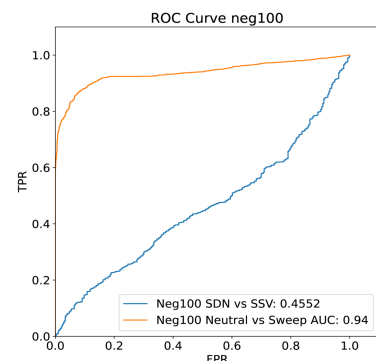

Normalized Confusion Matrix

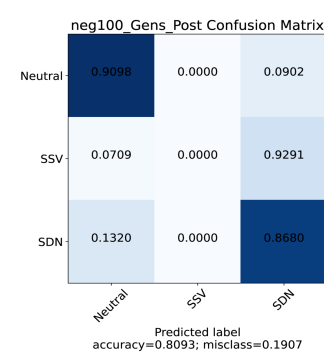

Confusion Matrix

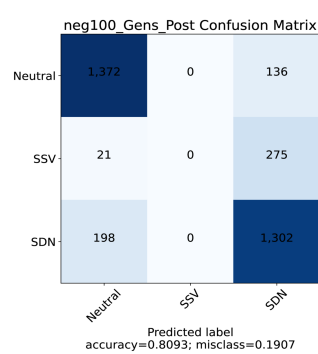

Training

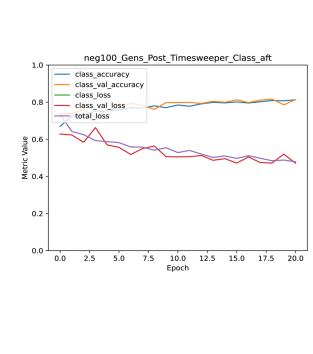

PR Curve

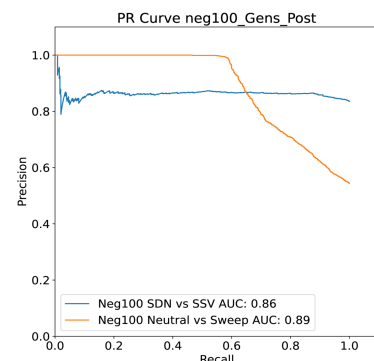

ROC Curve

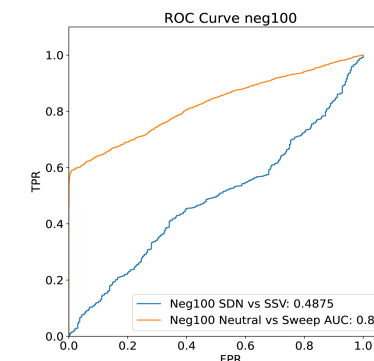

Normalized Confusion Matrix

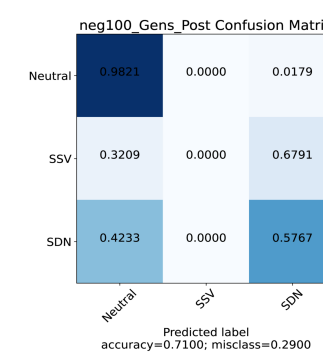

Confusion Matrix

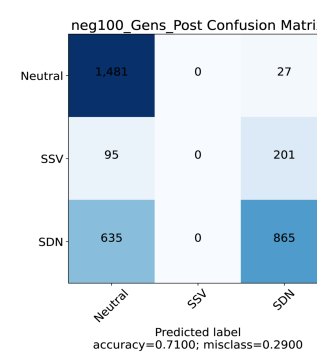

Training

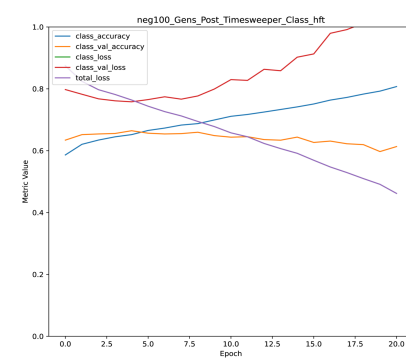

-50 Gens

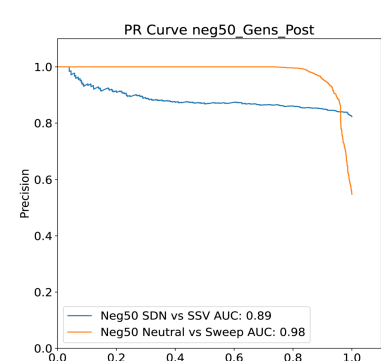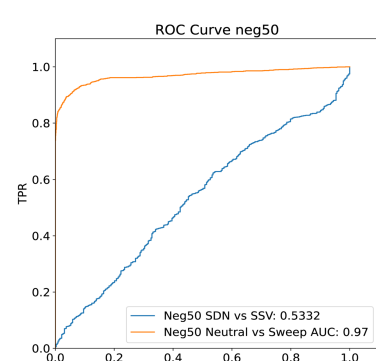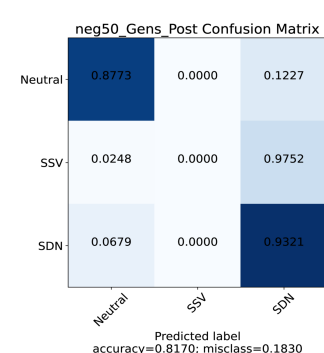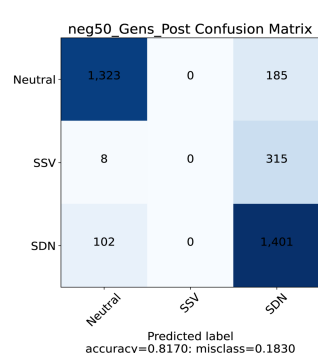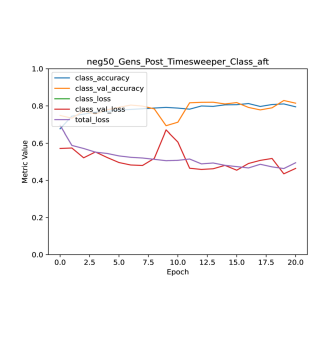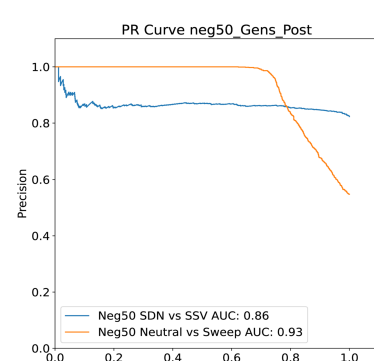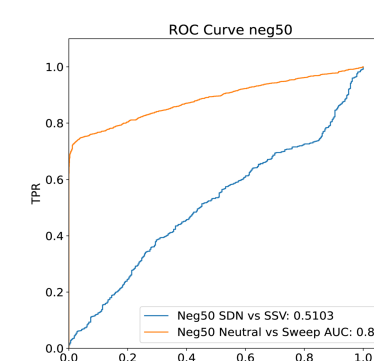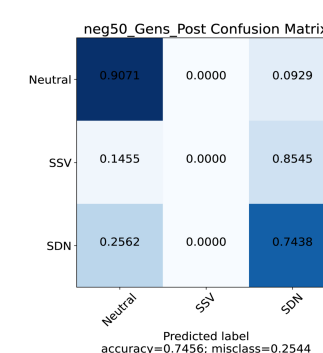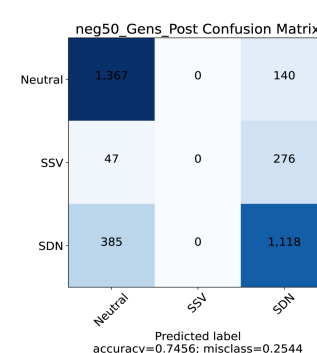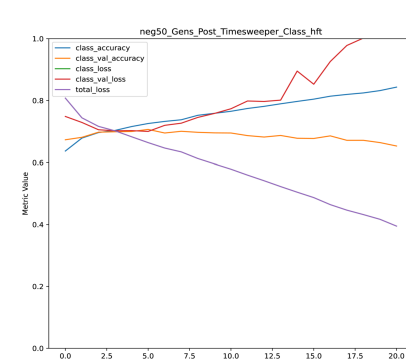

0 Gens

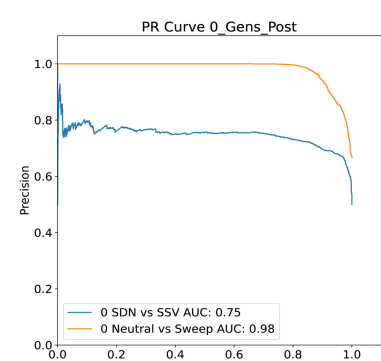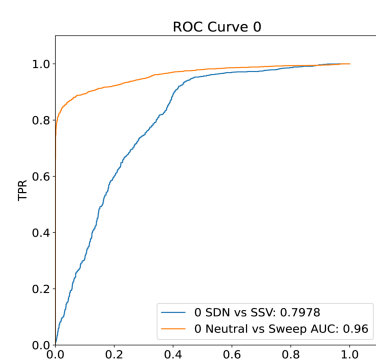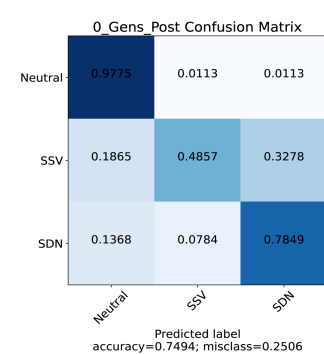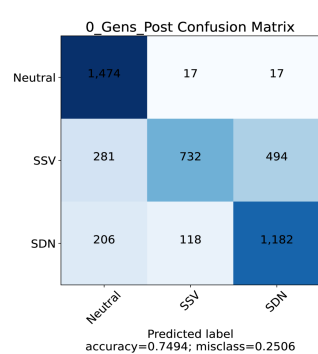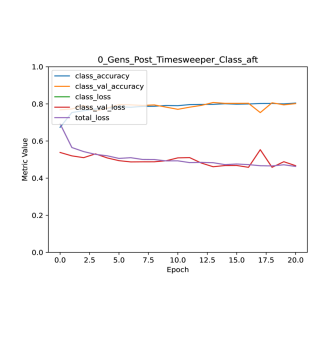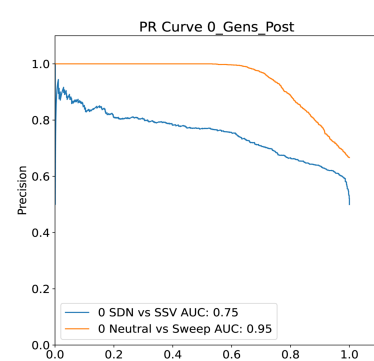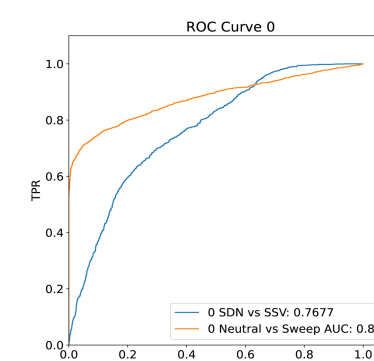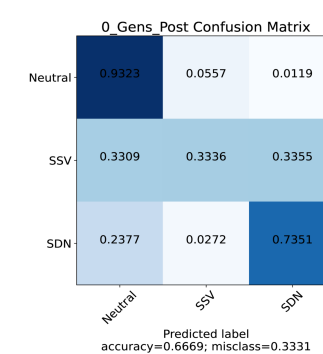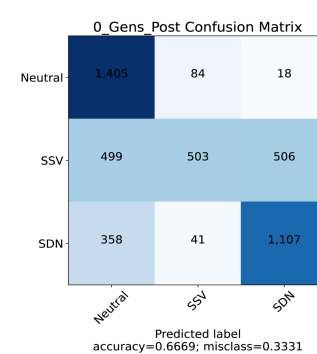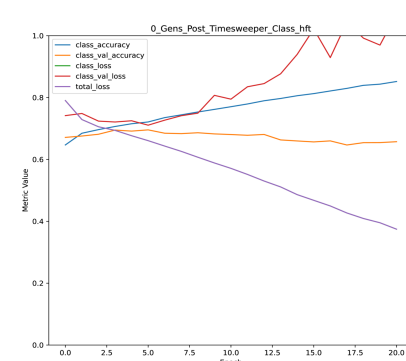

25 Gens

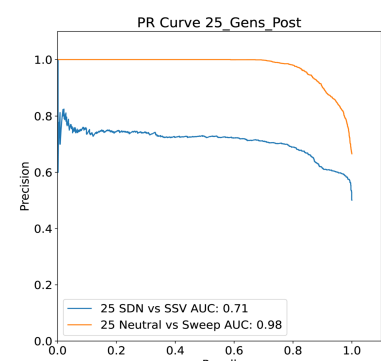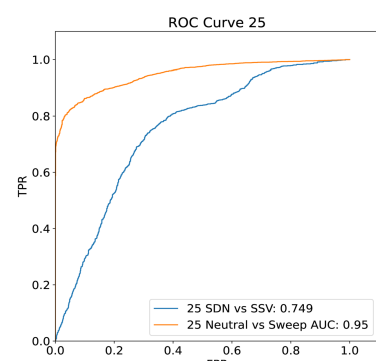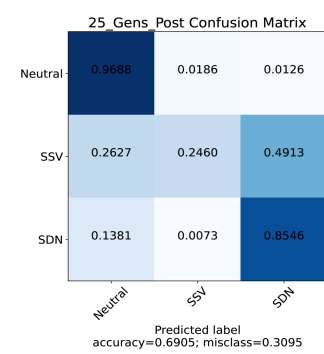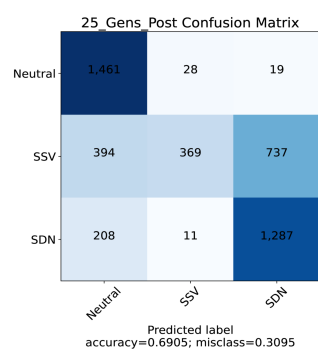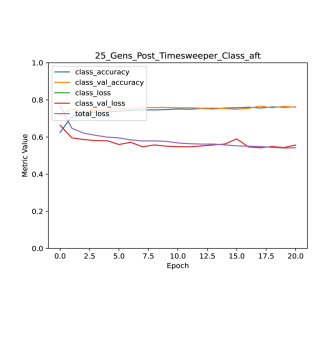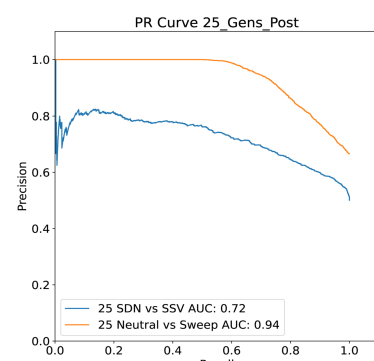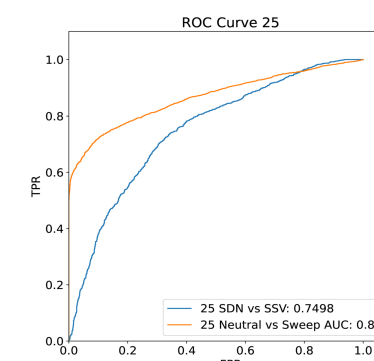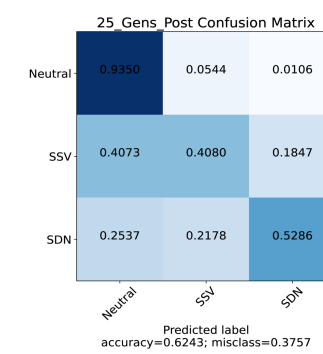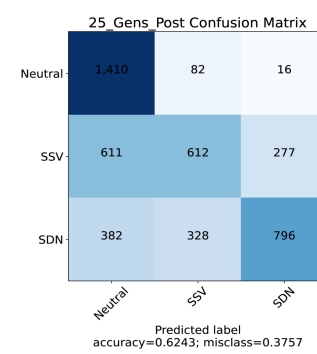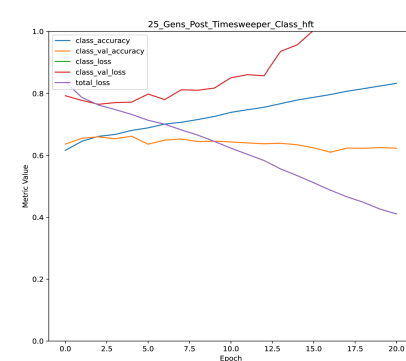

50 Gens

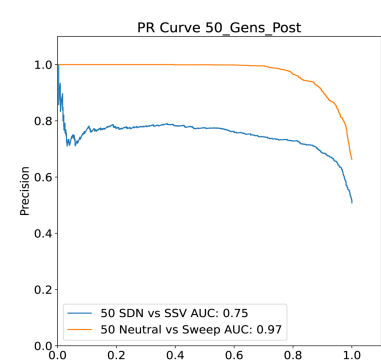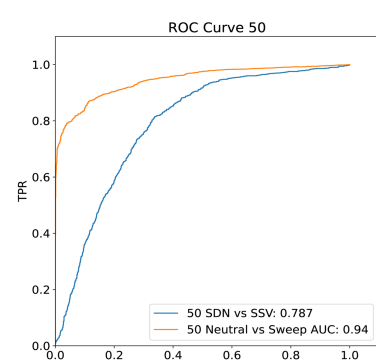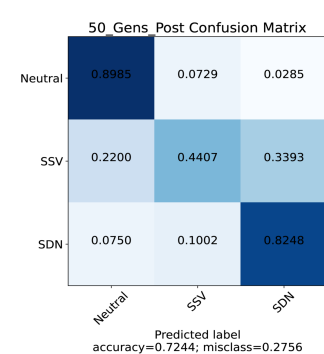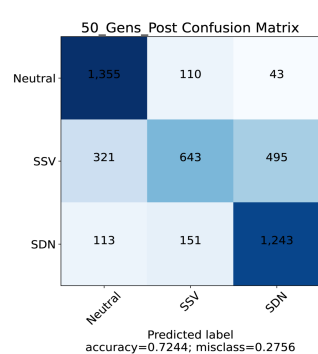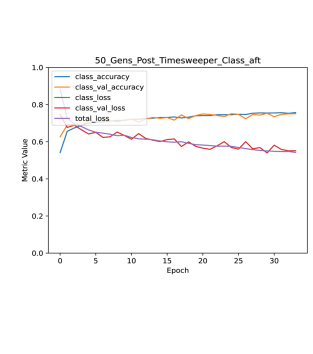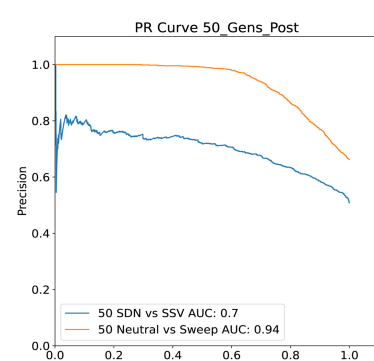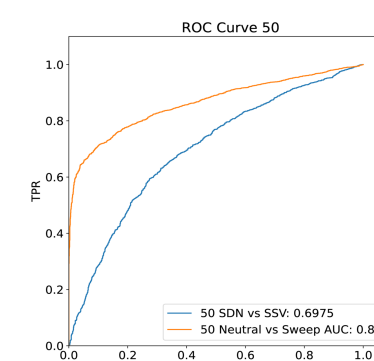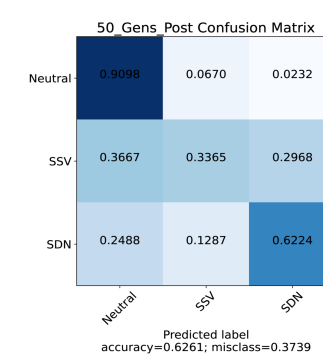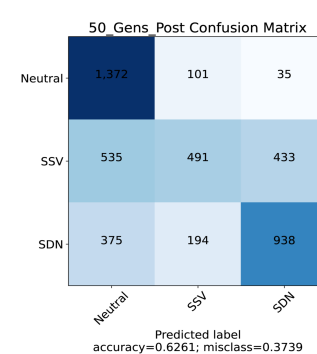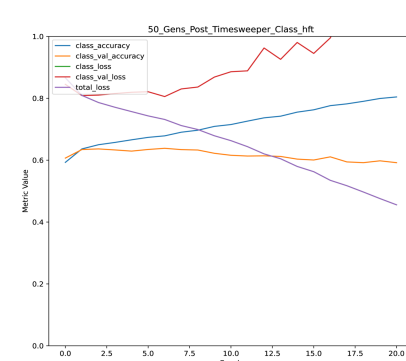

100 Gens

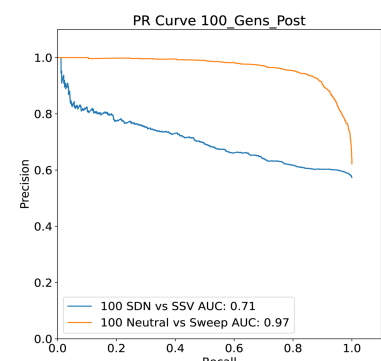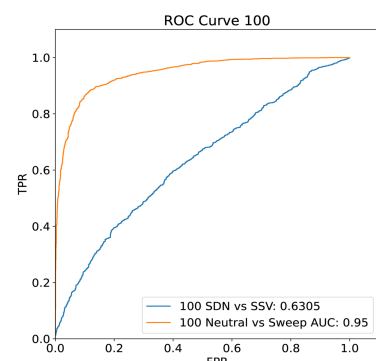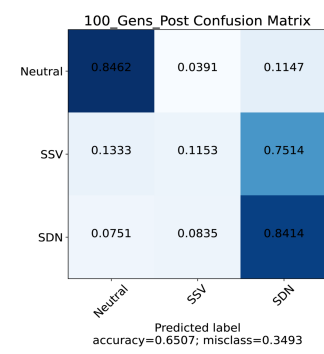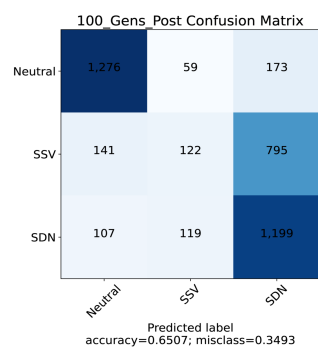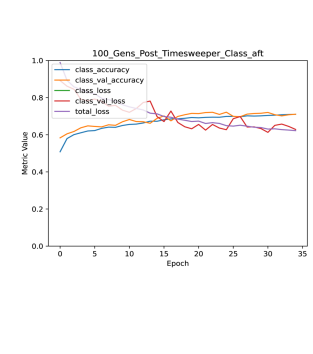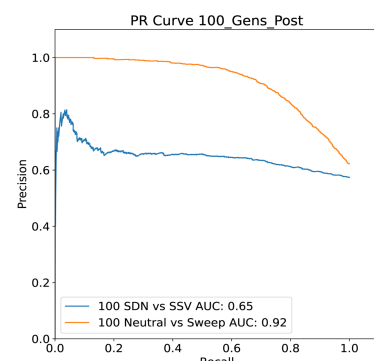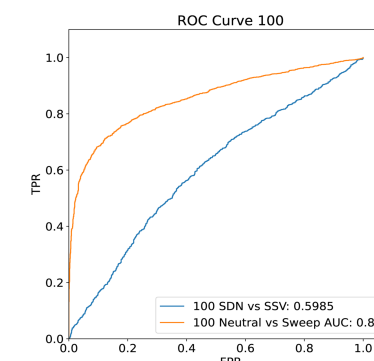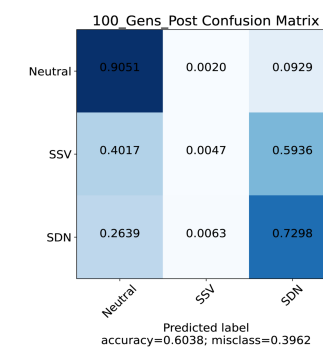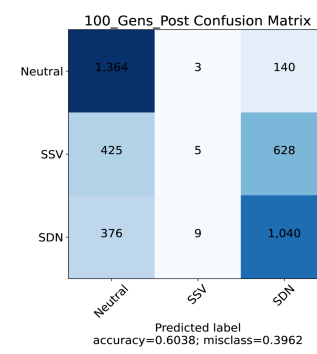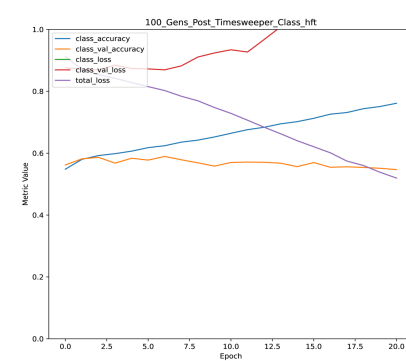

200 Gens

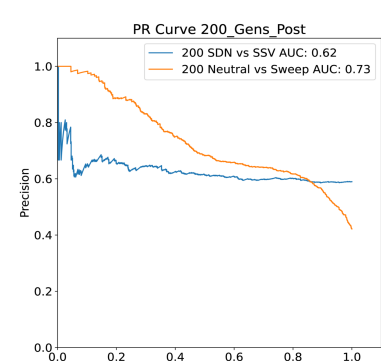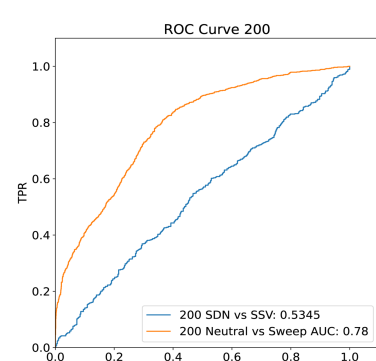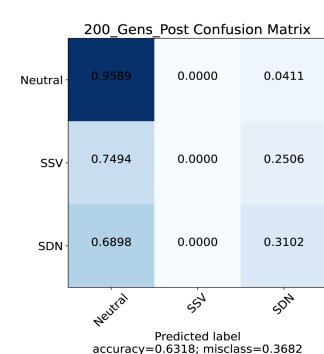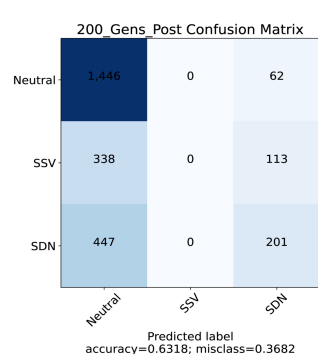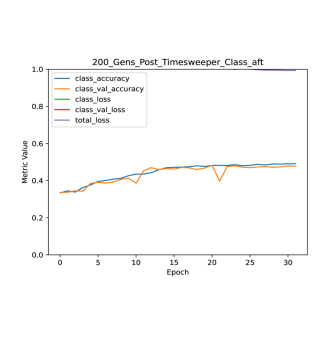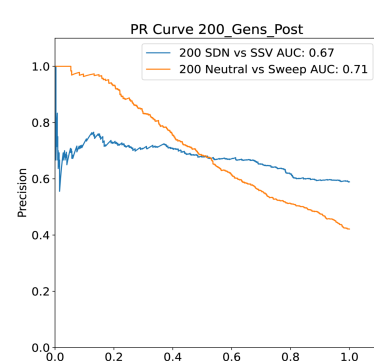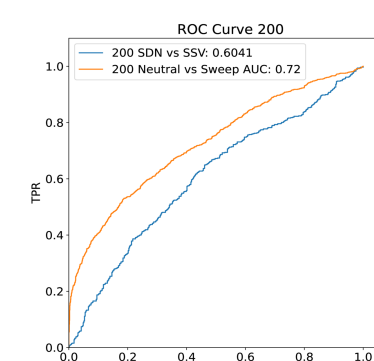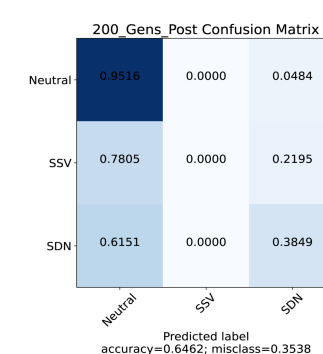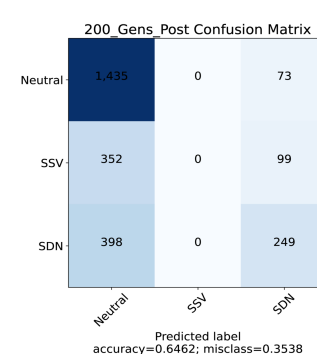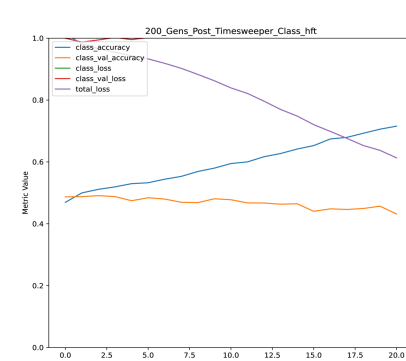

Supplement: Supplementary file 20 [file 1]
