# Supplementary material
Source: publisher figshare collection journal article supplement (https://gsajournals.figshare.com/articles/dataset/_/22584583)

# Regression - Varying Timepoints

AFT

HFT

1 Timepoint

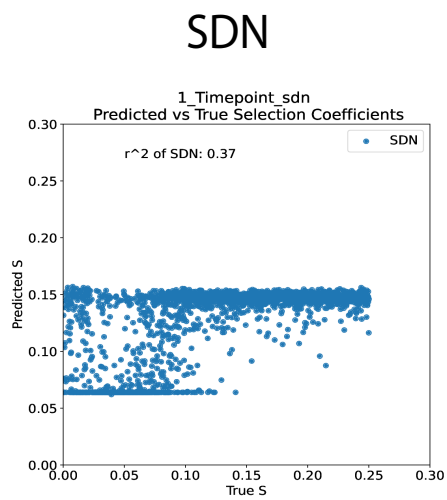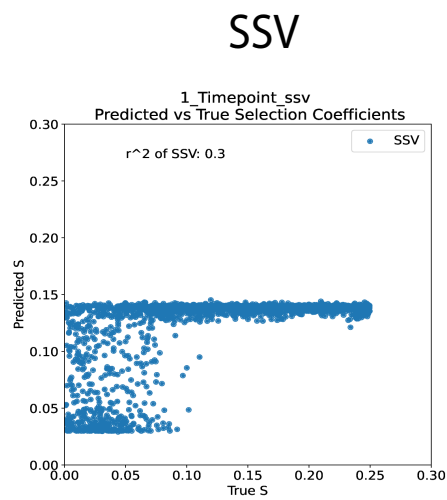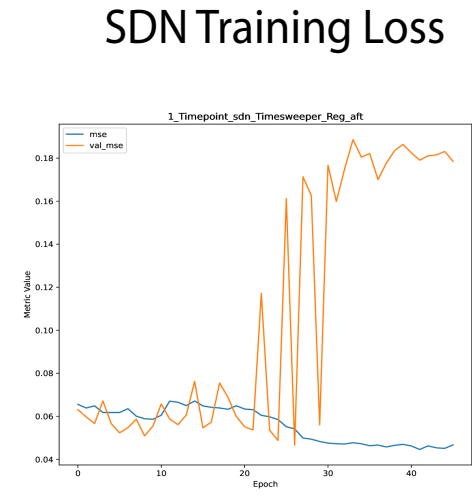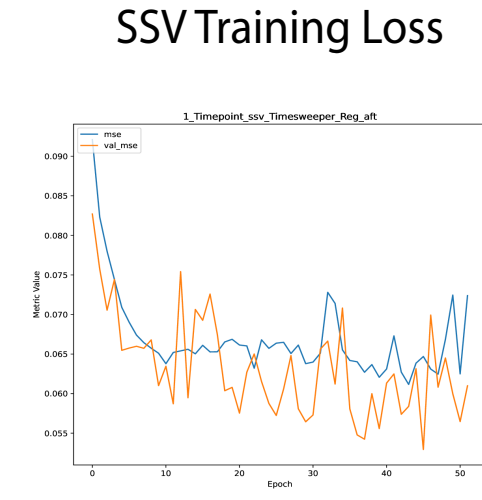

2 Timepoints

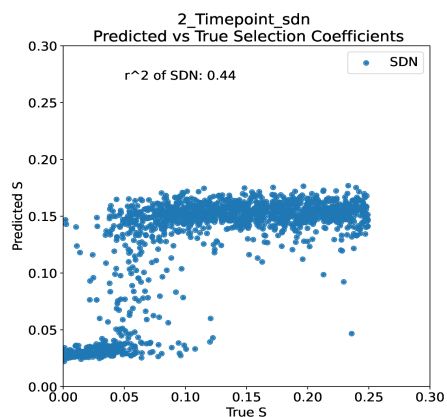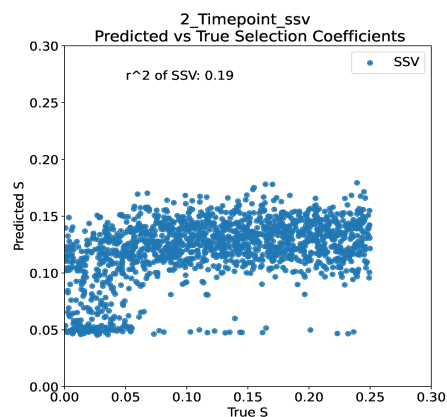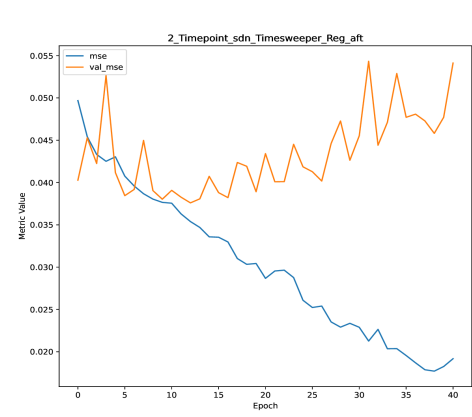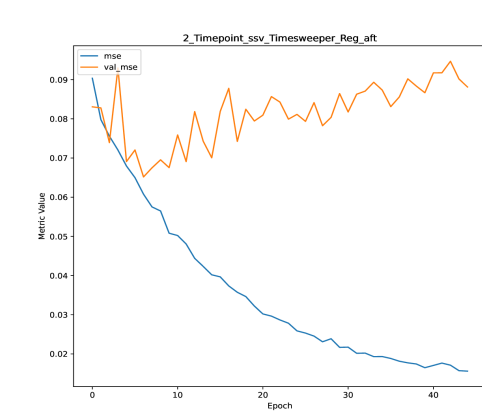

5 Timepoints

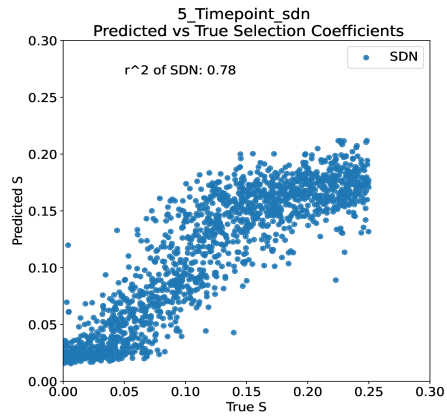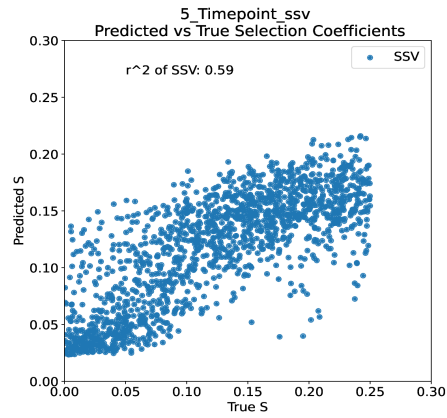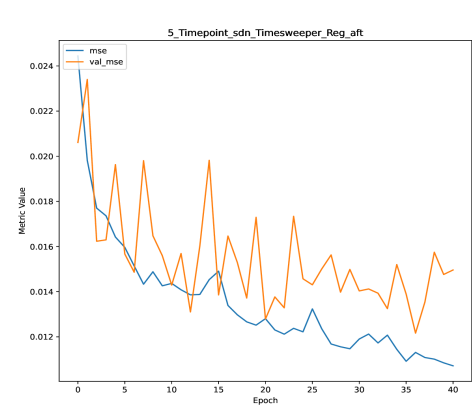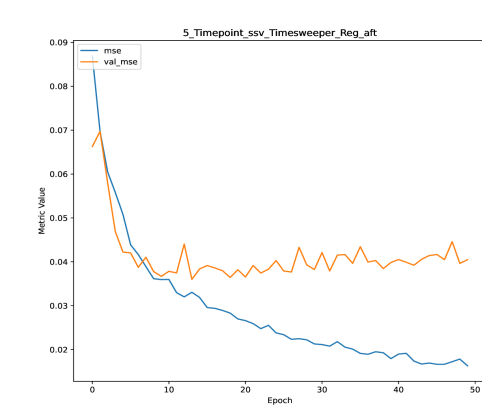

10 Timepoints

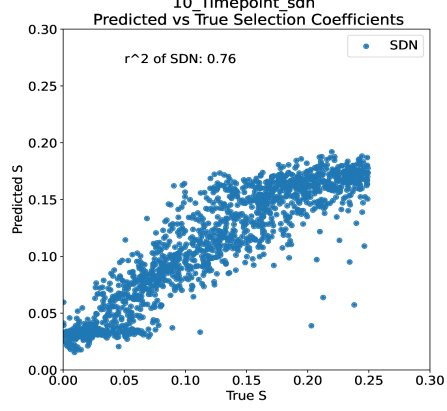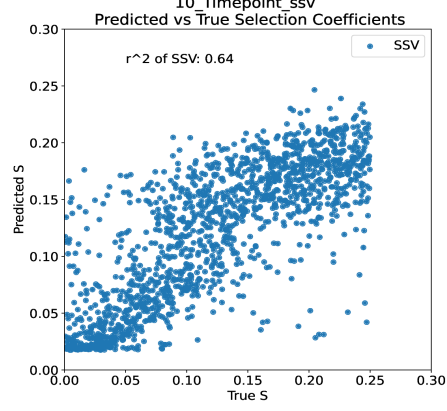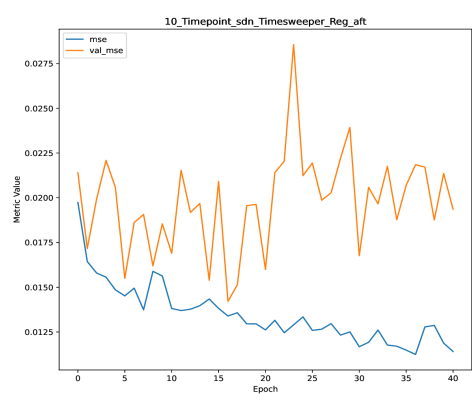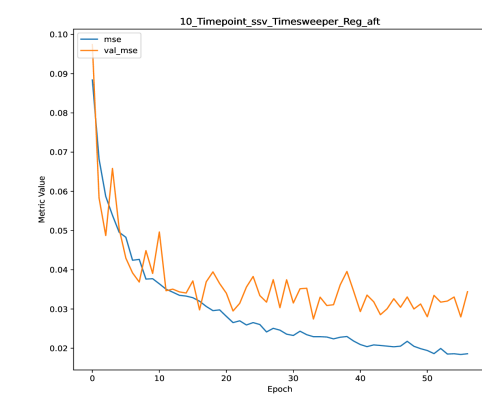

20 Timepoints

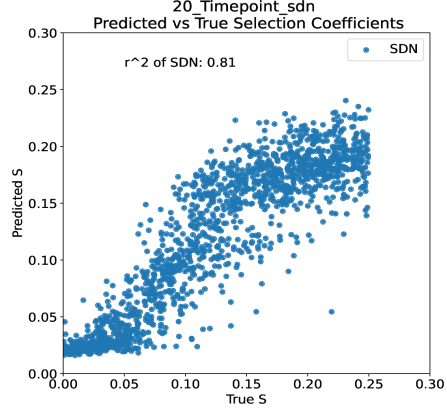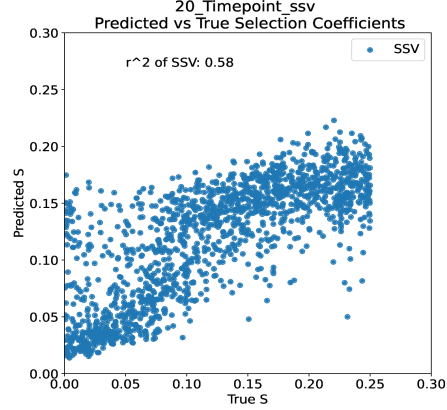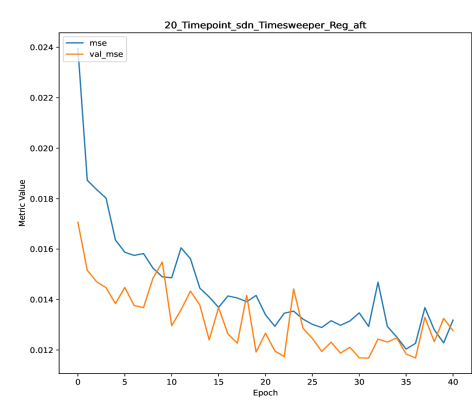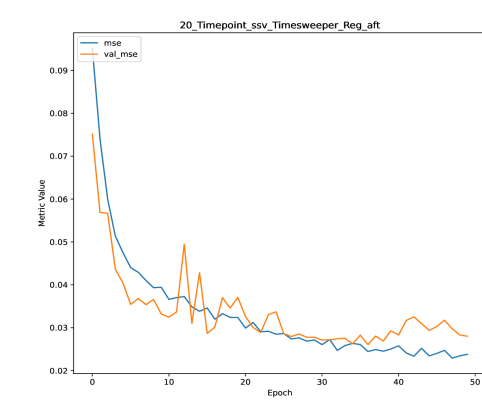

40 Timepoints

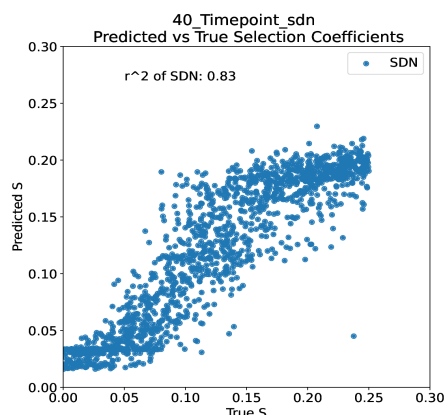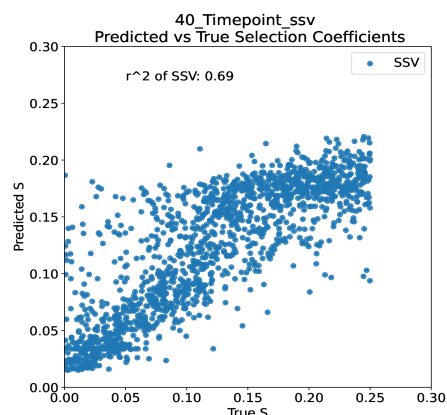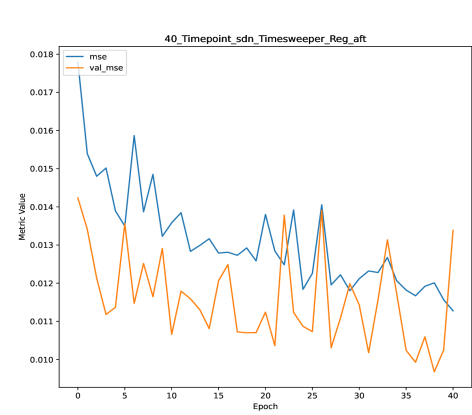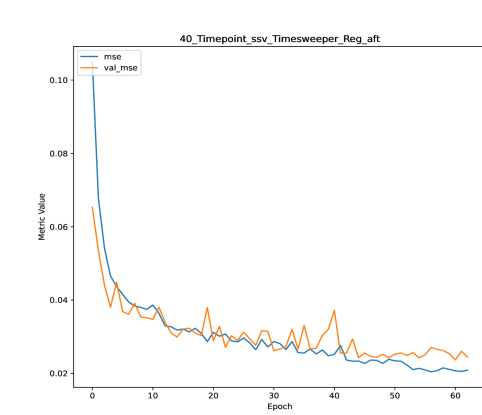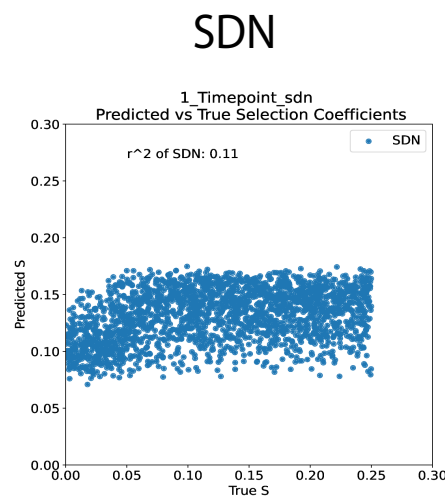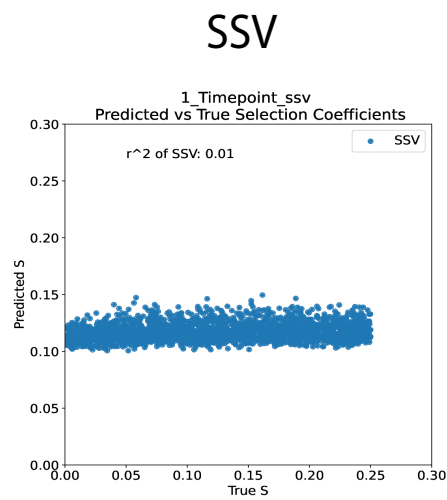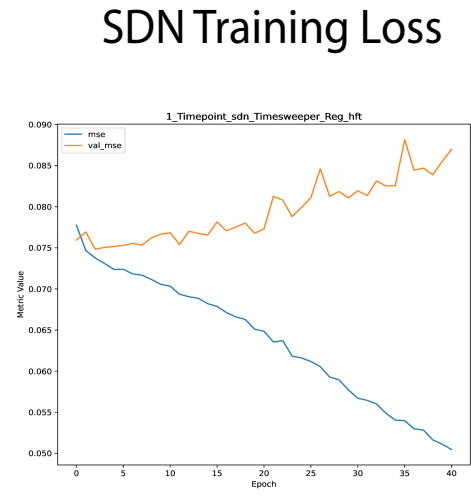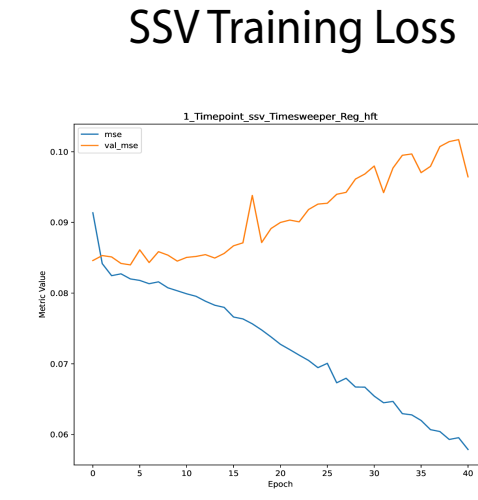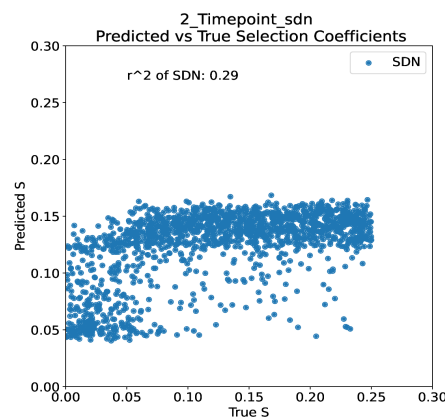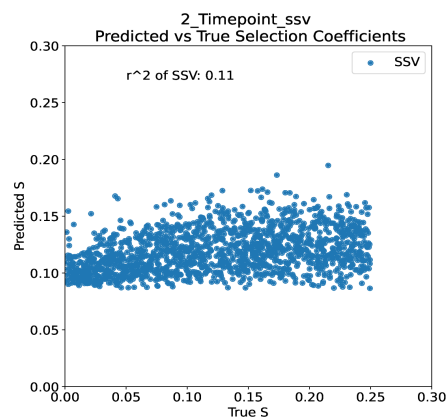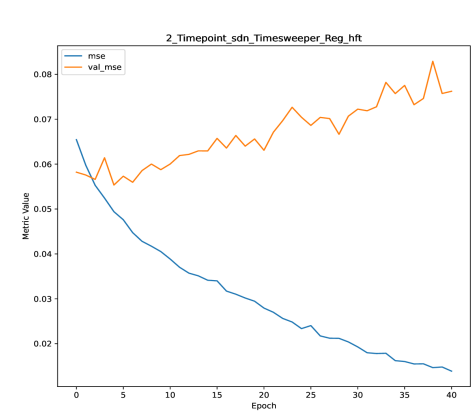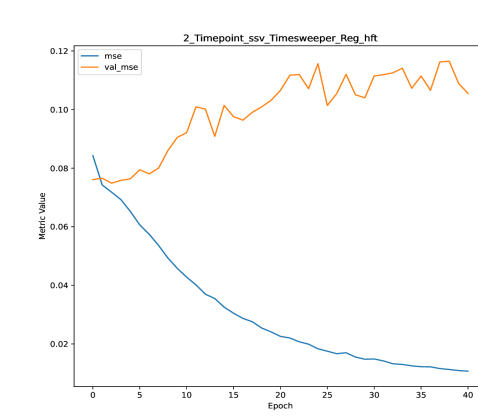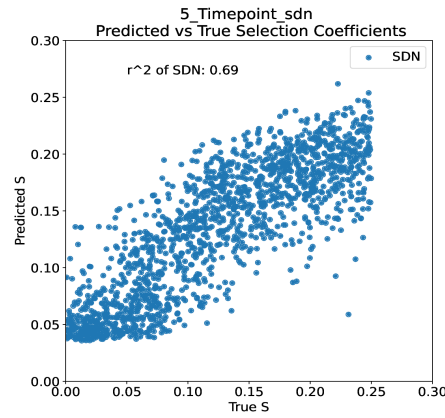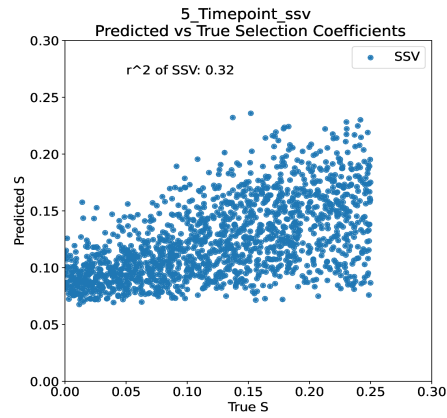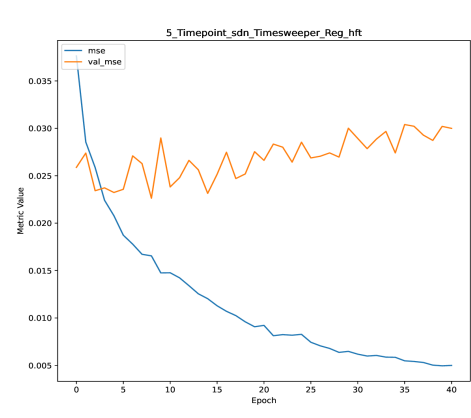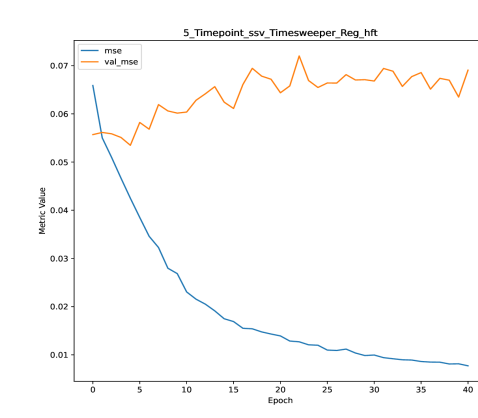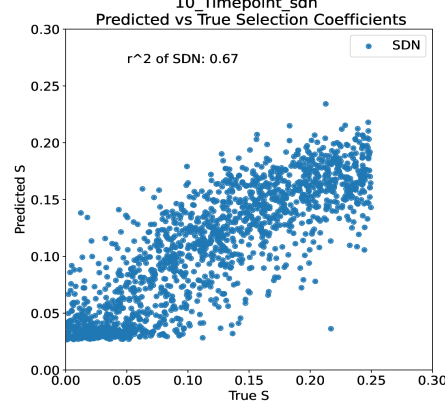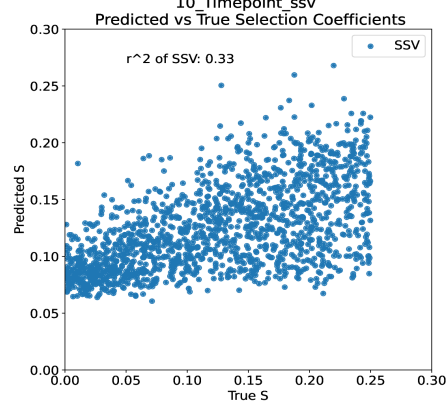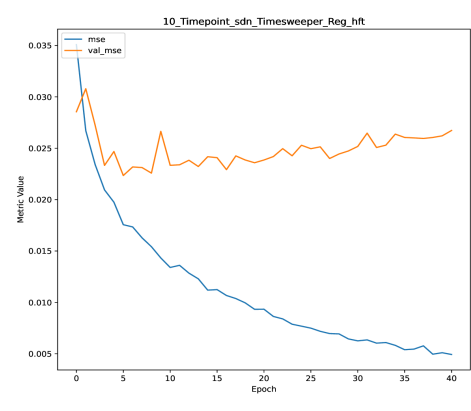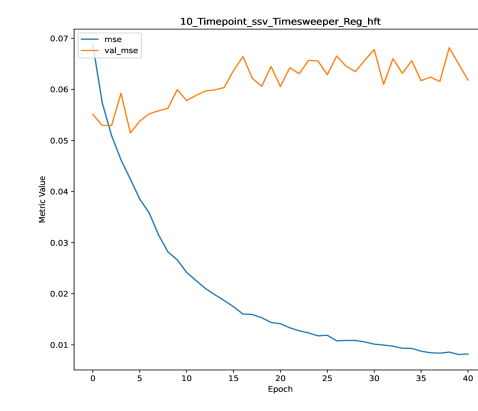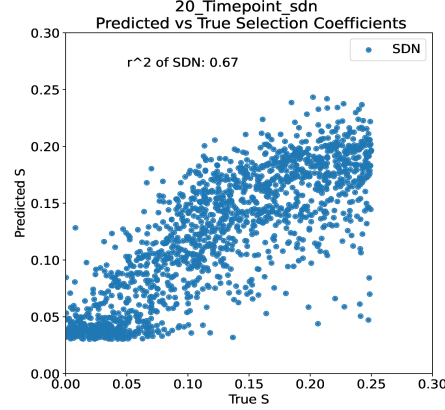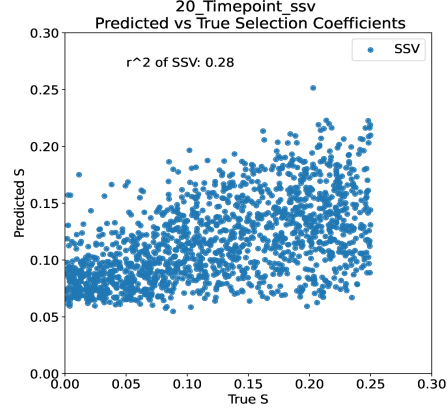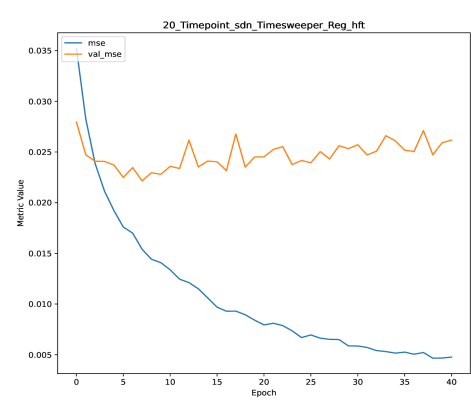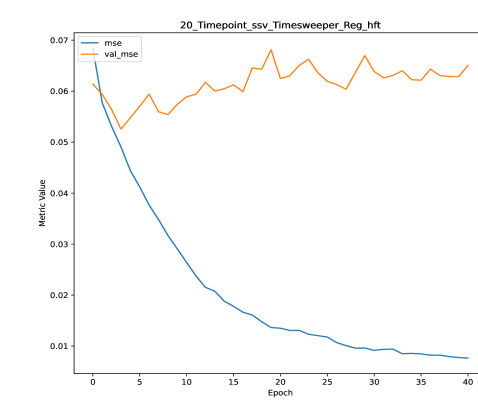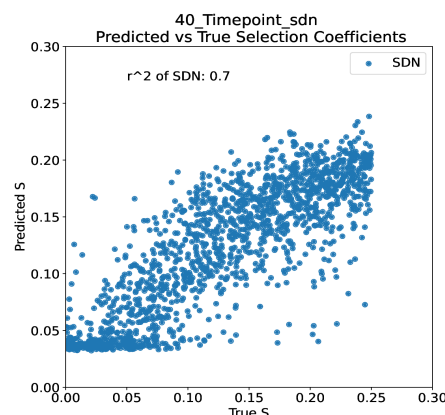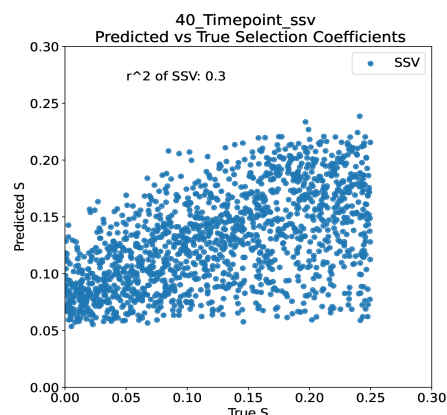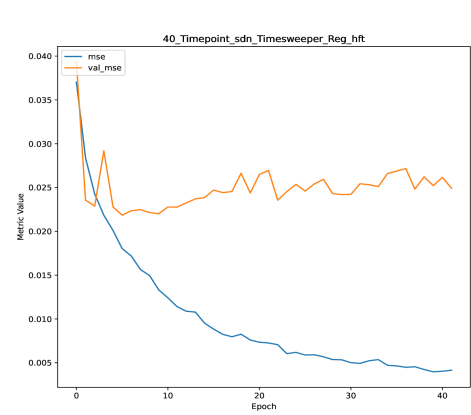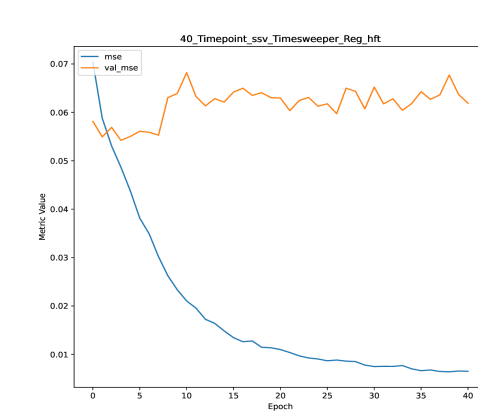

Supplement: Supplementary file 6 [file 1]
