# Supplementary material
Source: publisher figshare collection journal article supplement (https://gsajournals.figshare.com/articles/dataset/_/22584583)

# Regression - Number Replicates

AFT

HFT

1k Reps

SDN

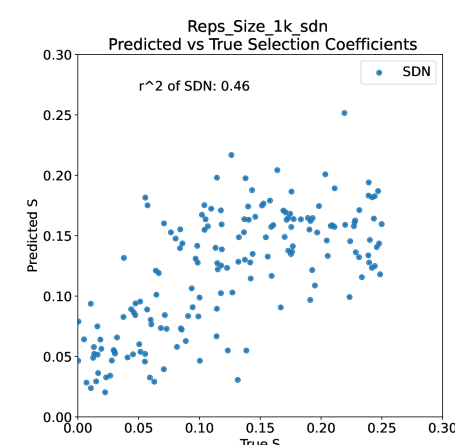

SSV

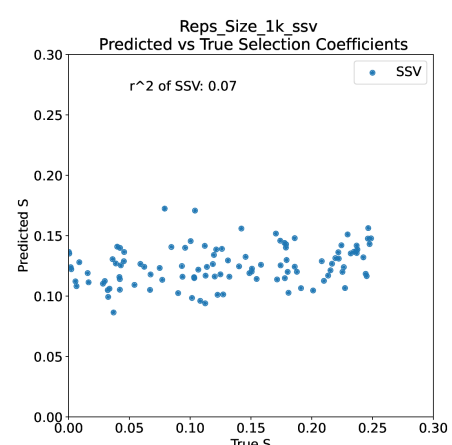

SDN Training Loss

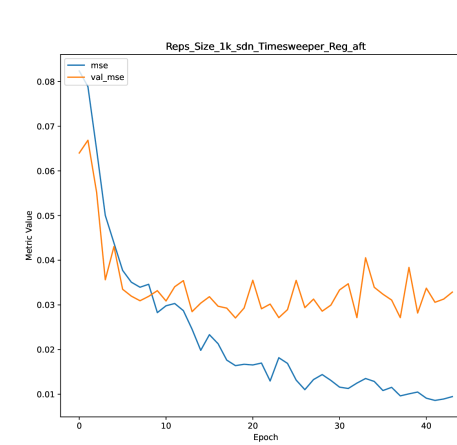

SSV Training Loss

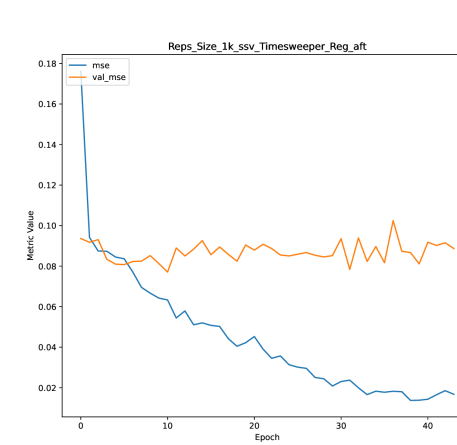

SDN

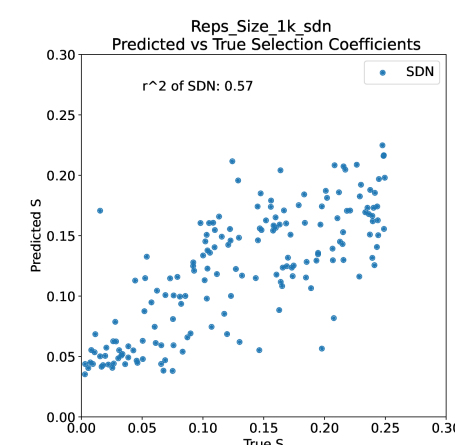

SSV

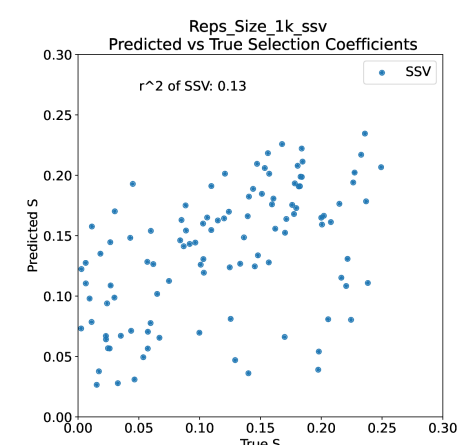

SDN Training Loss

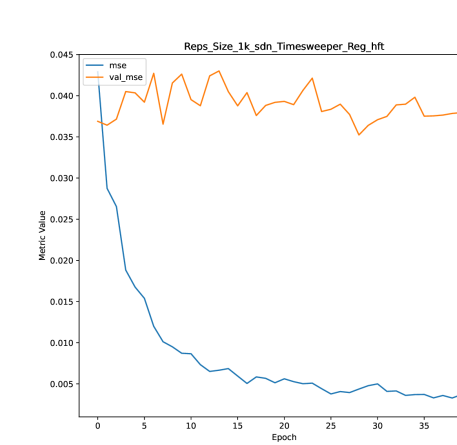

SSV Training Loss

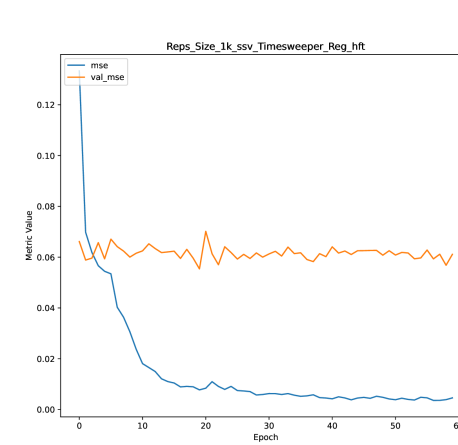

2k Reps

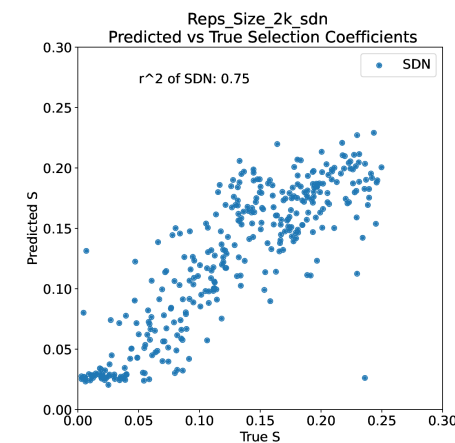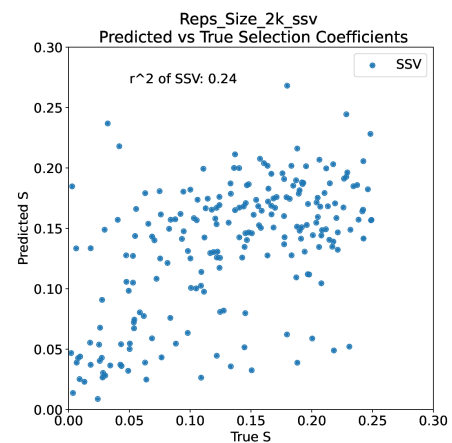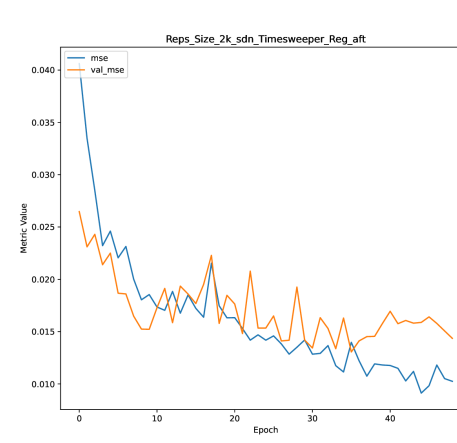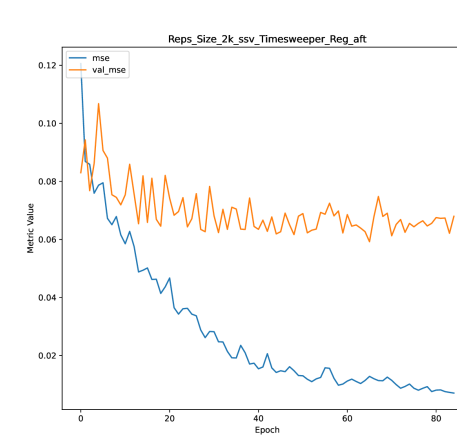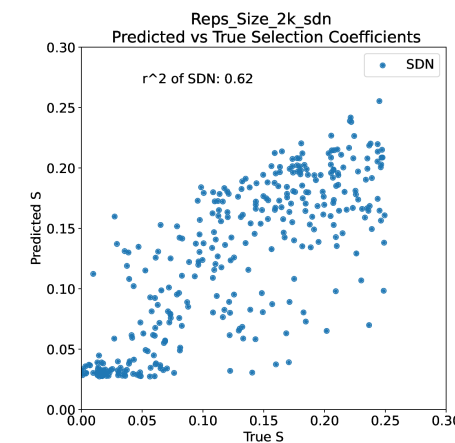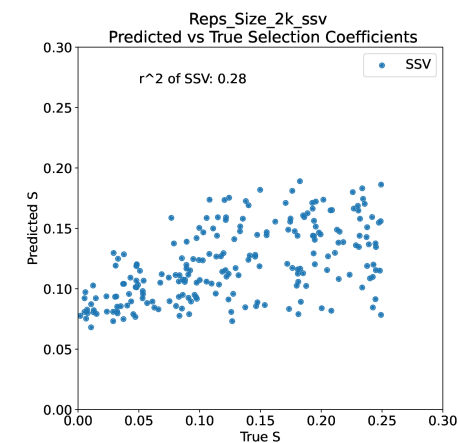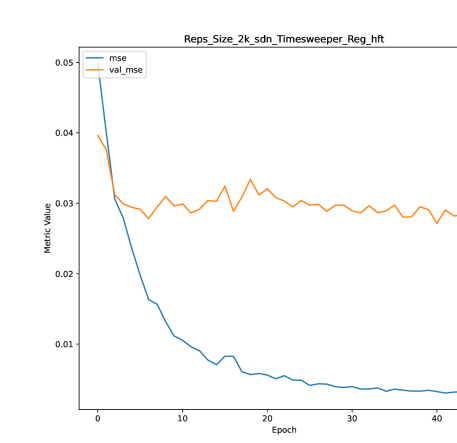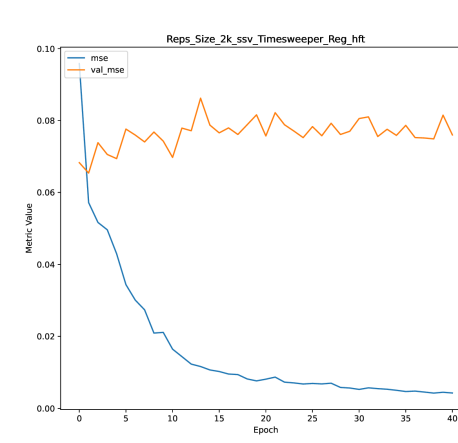

5k Reps

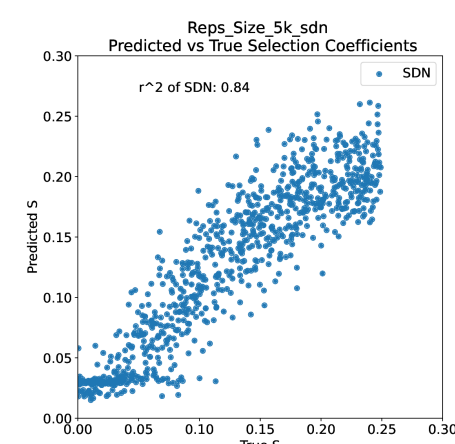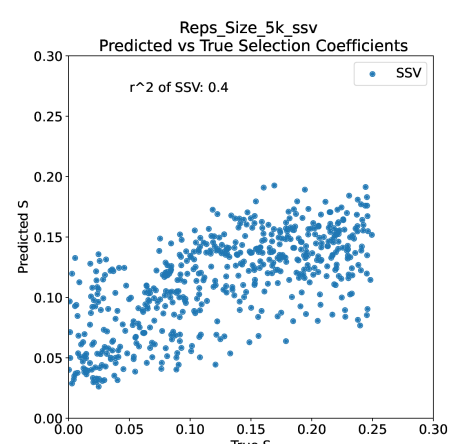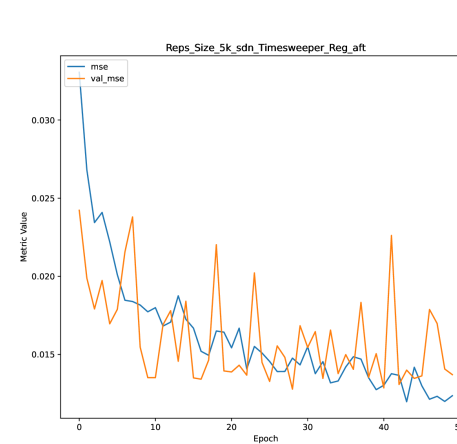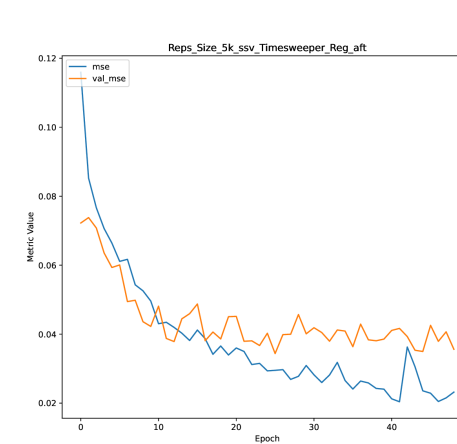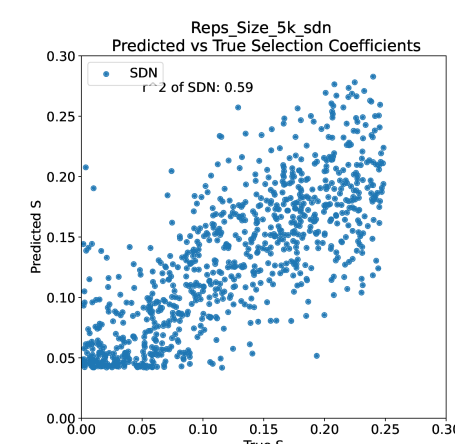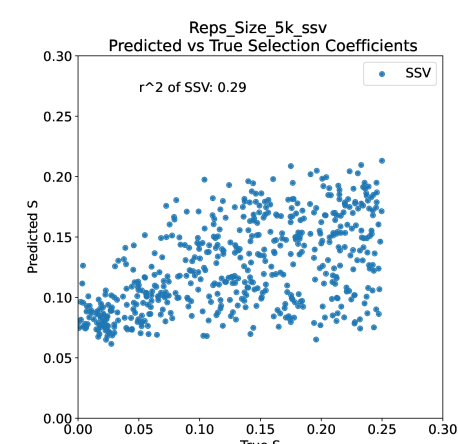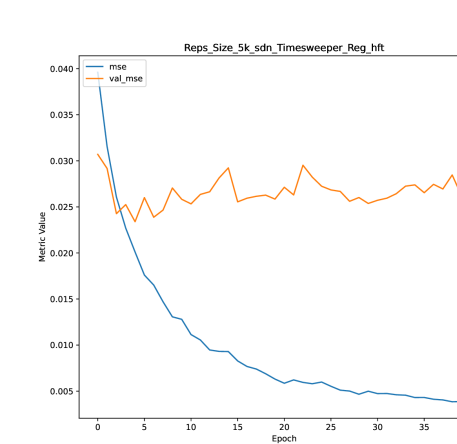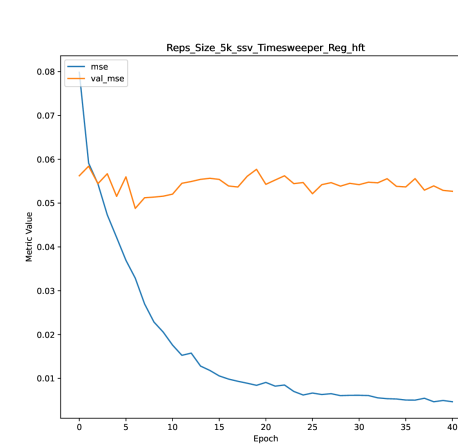

10k Reps

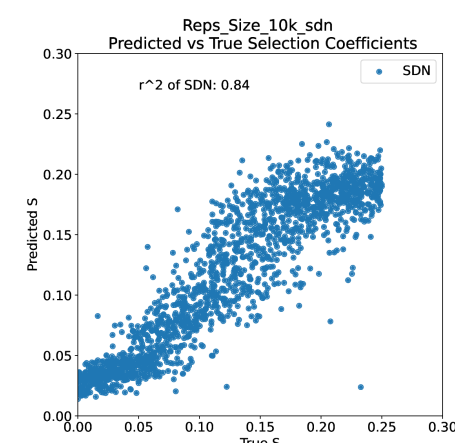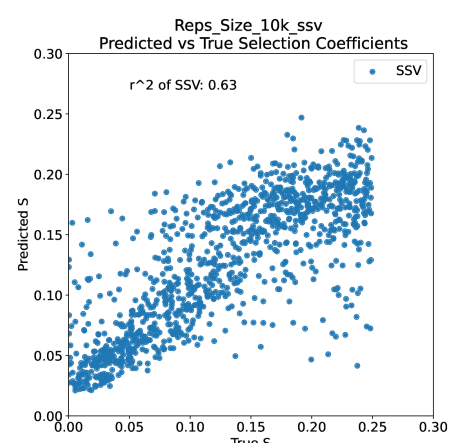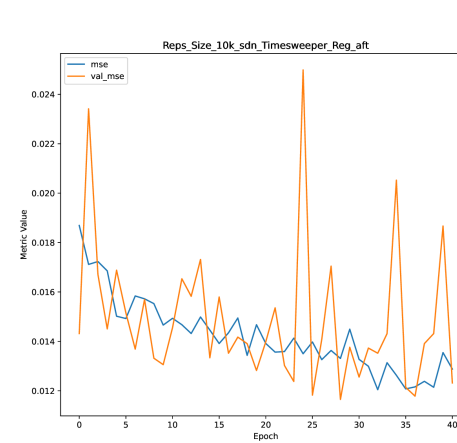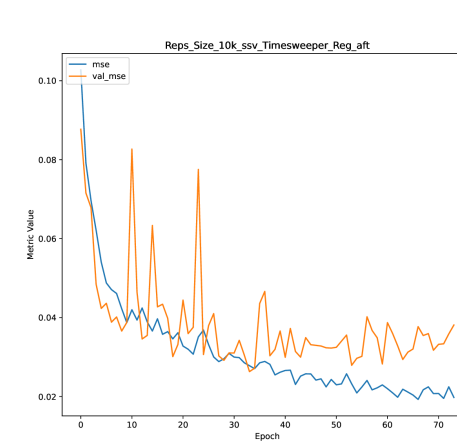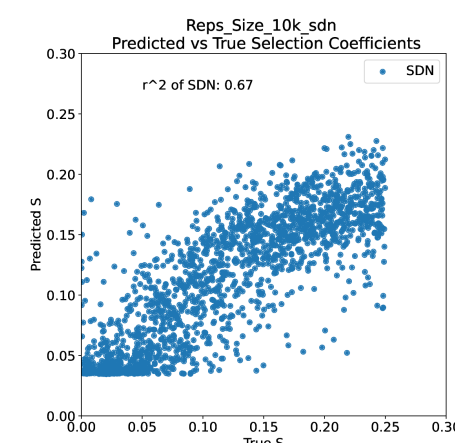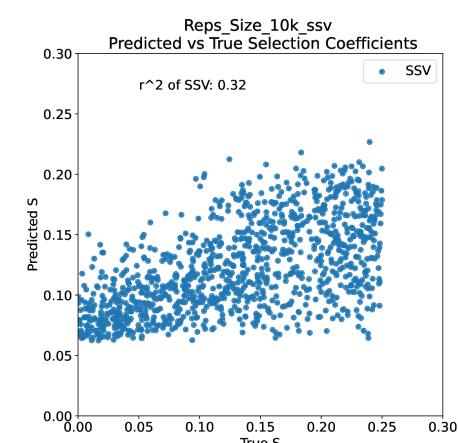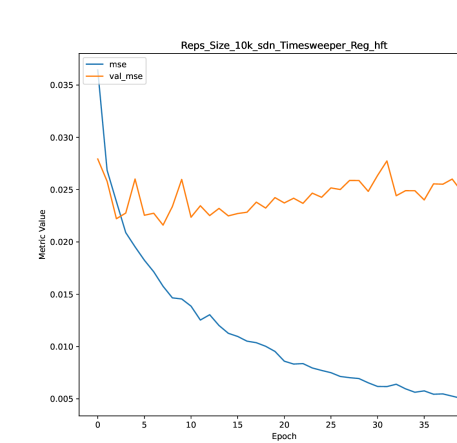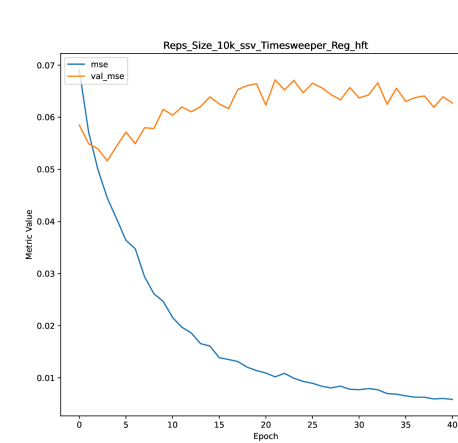

20k Reps

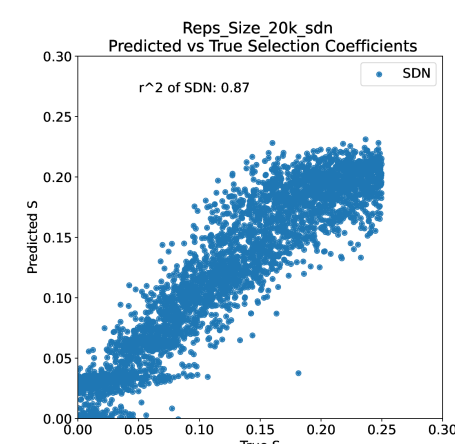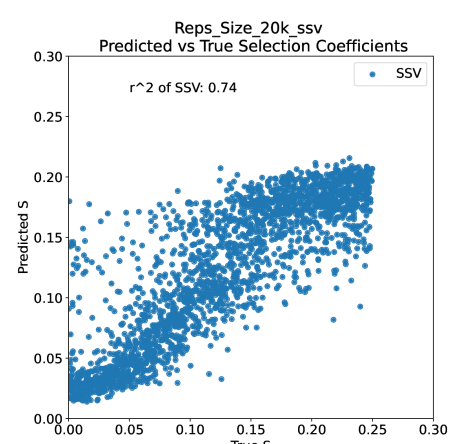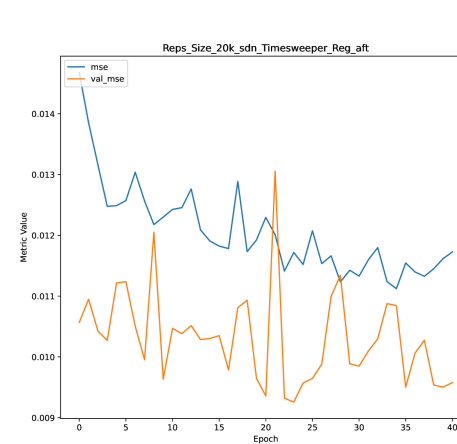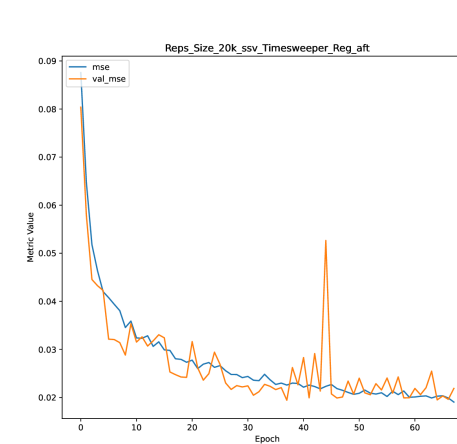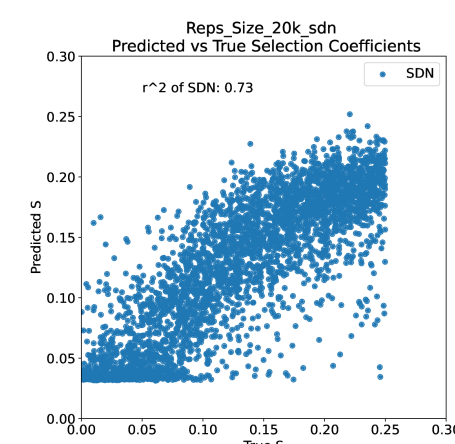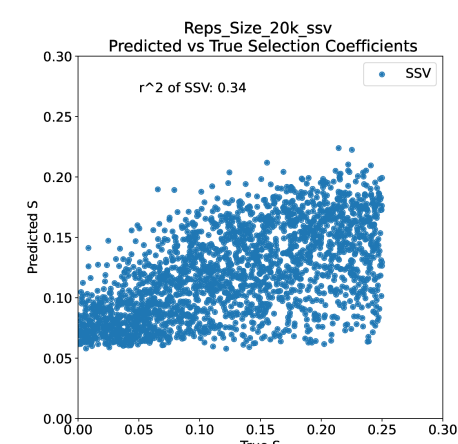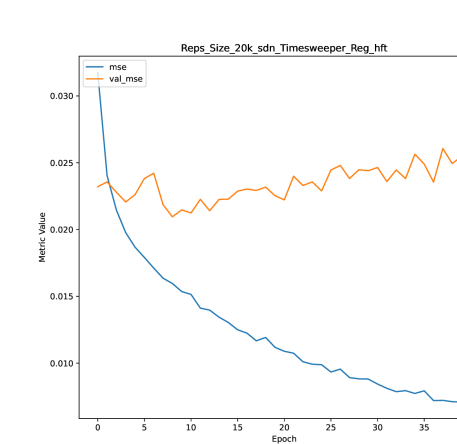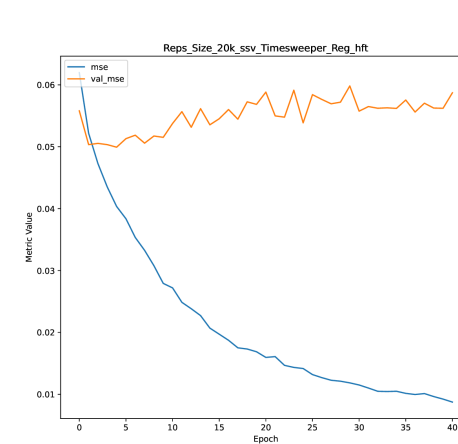

30k Reps

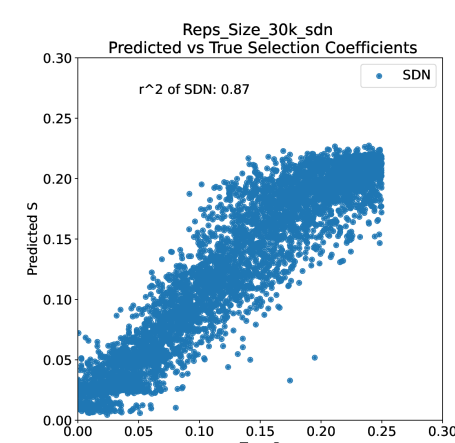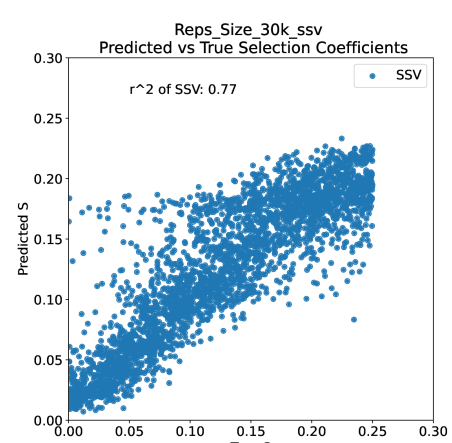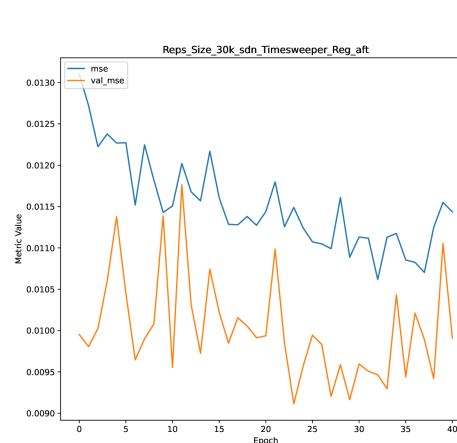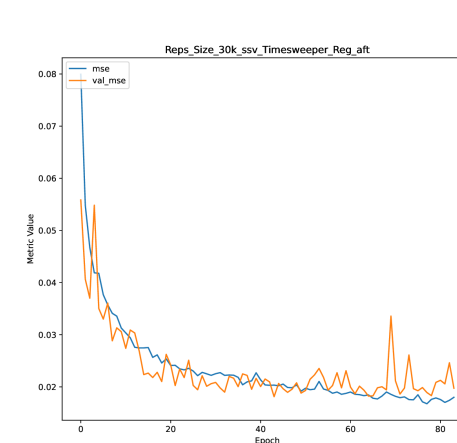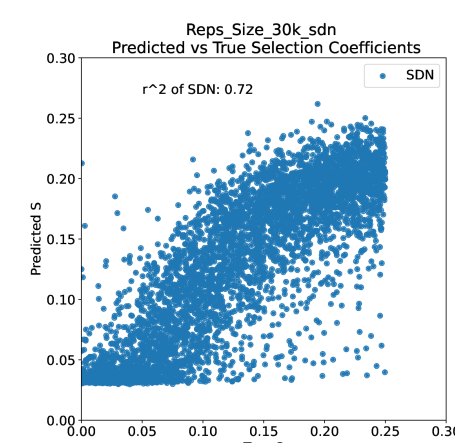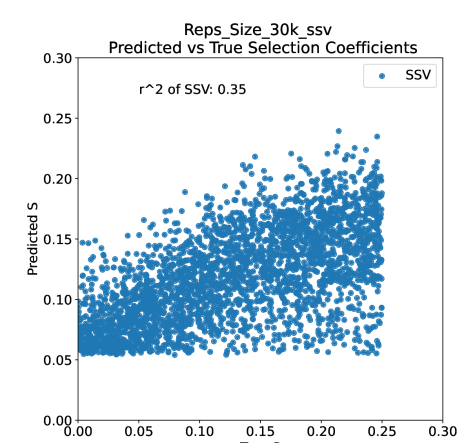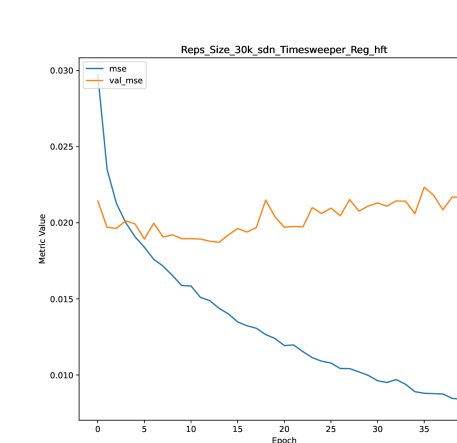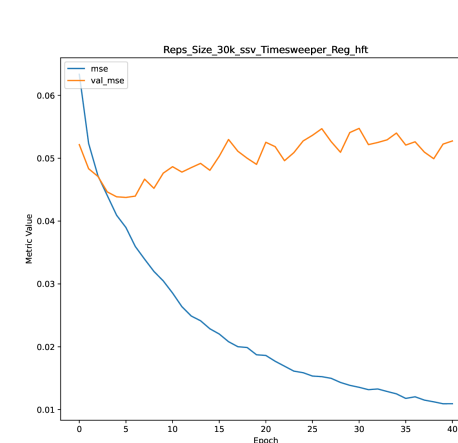

Supplement: Supplementary file 22 [file 1]
