# Supplementary material
Source: publisher figshare collection journal article supplement (https://gsajournals.figshare.com/articles/dataset/_/22584583)
Supplement: Supplementary file 2 [file 1]

# Window Size PR Curves

## AFT

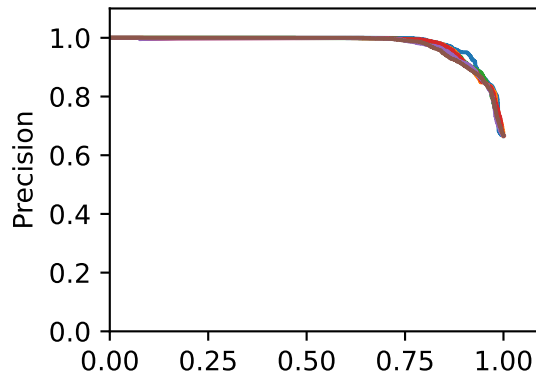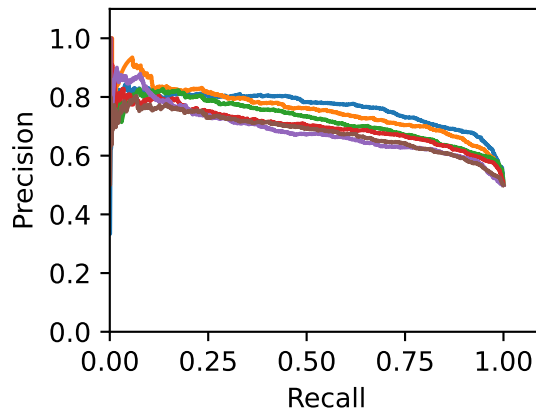

## HFT

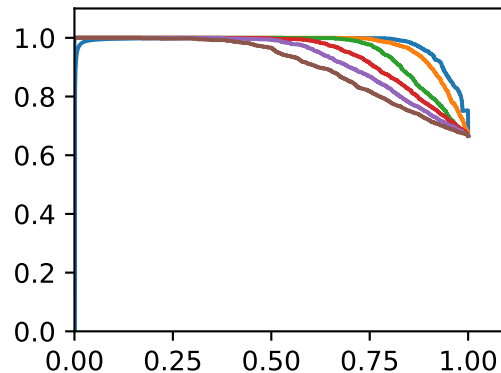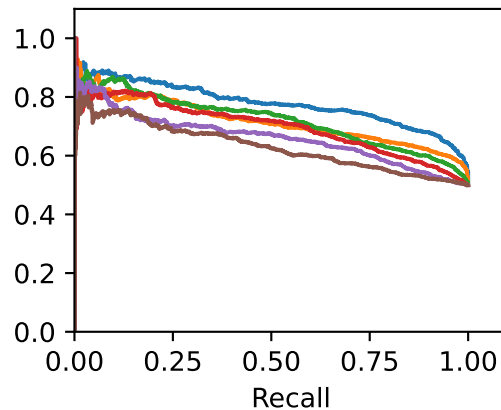

- l=1 vs Sweep AUC: 0.98
- l=3 vs Sweep AUC: 0.98
- l=11 vs Sweep AUC: 0.98
- l=51 vs Sweep AUC: 0.98
- l=101 vs Sweep AUC: 0.98
- l=201 vs Sweep AUC: 0.98

- l=1 vs Sweep AUC: 0.98
- l=3 vs Sweep AUC: 0.98
- l=11 vs Sweep AUC: 0.96
- l=51 vs Sweep AUC: 0.94
- l=101 vs Sweep AUC: 0.93
- l=201 vs Sweep AUC: 0.9

- l=1 SDN vs SSV AUC: 0.78
- l=3 SDN vs SSV AUC: 0.72
- l=11 SDN vs SSV AUC: 0.72
- l=51 SDN vs SSV AUC: 0.7
- l=101 SDN vs SSV AUC: 0.66
- l=201 SDN vs SSV AUC: 0.63
