# Supplementary material
Source: publisher figshare collection journal article supplement (https://gsajournals.figshare.com/articles/dataset/_/22584583)
Supplement: Supplementary file 7 [file 1]

# Window Size ROC Curves

## AFT

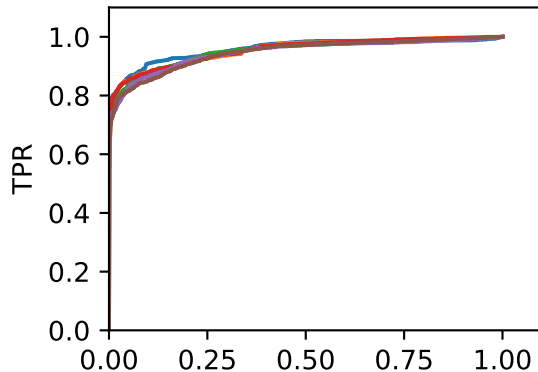

## HFT

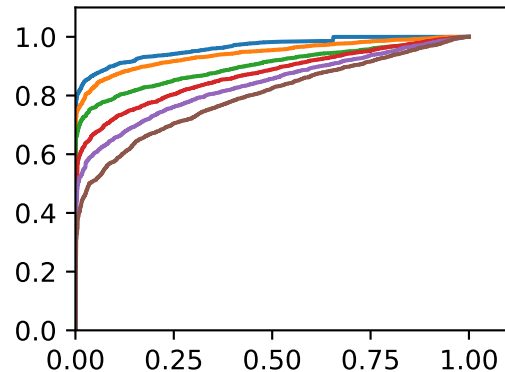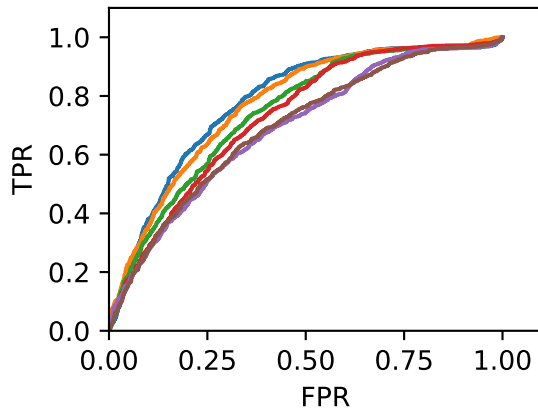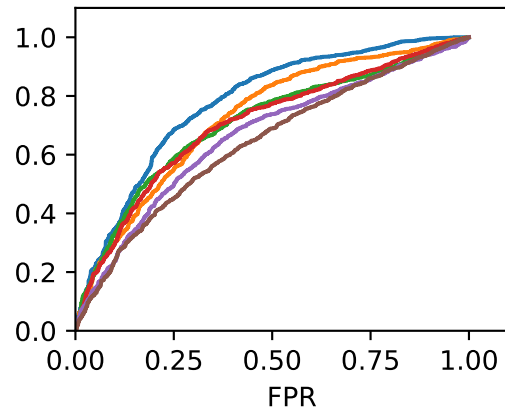

- l=1 Neutral vs Sweep AUC: 0.96
- l=3 Neutral vs Sweep AUC: 0.95
- l=11 Neutral vs Sweep AUC: 0.95
- l=51 Neutral vs Sweep AUC: 0.95
- l=101 Neutral vs Sweep AUC: 0.95
- l=201 Neutral vs Sweep AUC: 0.95

- l=1 Neutral vs Sweep AUC: 0.96
- l=3 Neutral vs Sweep AUC: 0.94
- l=11 Neutral vs Sweep AUC: 0.9
- l=51 Neutral vs Sweep AUC: 0.87
- l=101 Neutral vs Sweep AUC: 0.84
- l=201 Neutral vs Sweep AUC: 0.8

- l=1 TP SDN vs SSV AUC: 0.78
- l=3 TP SDN vs SSV AUC: 0.77
- l=11 TP SDN vs SSV AUC: 0.74
- l=51 TP SDN vs SSV AUC: 0.73
- l=101 TP SDN vs SSV AUC: 0.69
- l=201 TP SDN vs SSV AUC: 0.69

- l=1 TP SDN vs SSV AUC: 0.78
- l=3 TP SDN vs SSV AUC: 0.73
- l=11 TP SDN vs SSV AUC: 0.71
- l=51 TP SDN vs SSV AUC: 0.7
- l=101 TP SDN vs SSV AUC: 0.66
- l=201 TP SDN vs SSV AUC: 0.64
