# Supplementary material
Source: publisher figshare collection journal article supplement (https://gsajournals.figshare.com/articles/dataset/_/22584583)
Supplement: Supplementary file 9 [file 1]

## Number of Replicates ROC Curves

AFT

HFT

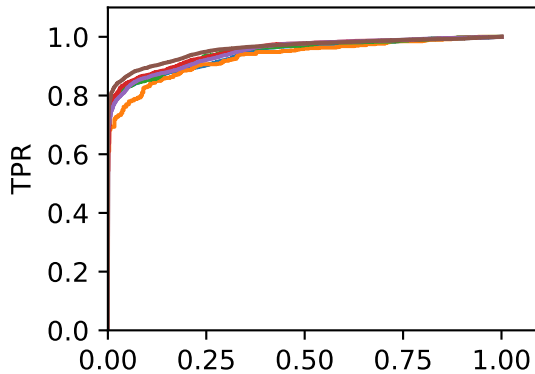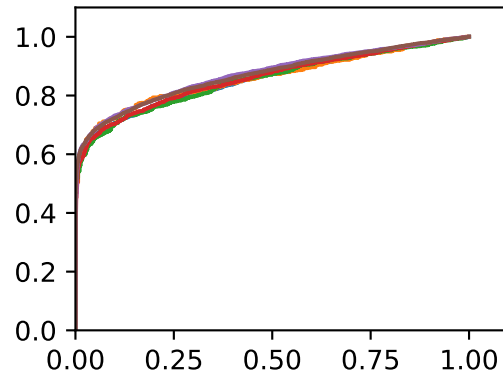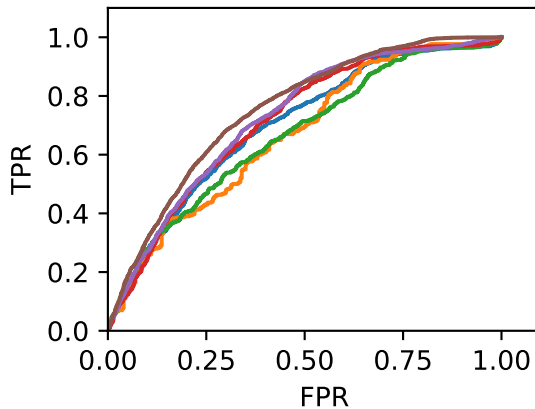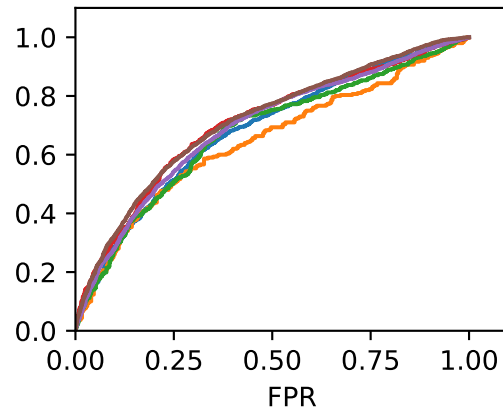

- 1k Neutral vs Sweep AUC: 0.94
- 2k Neutral vs Sweep AUC: 0.93
- 5k Neutral vs Sweep AUC: 0.95
- 10k Neutral vs Sweep AUC: 0.95
- 20k Neutral vs Sweep AUC: 0.95
- 30k Neutral vs Sweep AUC: 0.96

- 1k SDN vs SSV AUC: 0.7
- 2k SDN vs SSV AUC: 0.67
- 5k SDN vs SSV AUC: 0.67
- 10k SDN vs SSV AUC: 0.71
- 20k SDN vs SSV AUC: 0.72
- 30k SDN vs SSV AUC: 0.75

- 1k Neutral vs Sweep AUC: 0.86
- 2k Neutral vs Sweep AUC: 0.86
- 5k Neutral vs Sweep AUC: 0.85
- 10k Neutral vs Sweep AUC: 0.86
- 20k Neutral vs Sweep AUC: 0.87
- 30k Neutral vs Sweep AUC: 0.87

- 1k SDN vs SSV AUC: 0.68
- 2k SDN vs SSV AUC: 0.64
- 5k SDN vs SSV AUC: 0.67
- 10k SDN vs SSV AUC: 0.7
- 20k SDN vs SSV AUC: 0.69
- 30k SDN vs SSV AUC: 0.71
