# Supplementary material
Source: publisher figshare collection journal article supplement (https://gsajournals.figshare.com/articles/dataset/_/22584583)
Supplement: Supplementary file 11 [file 1]

# Post-Selection Sampling Start ROC Curves

## AFT

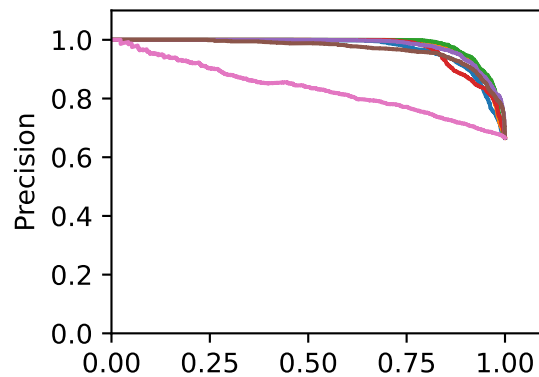

## HFT

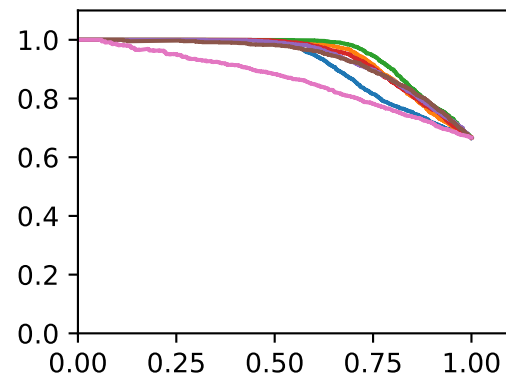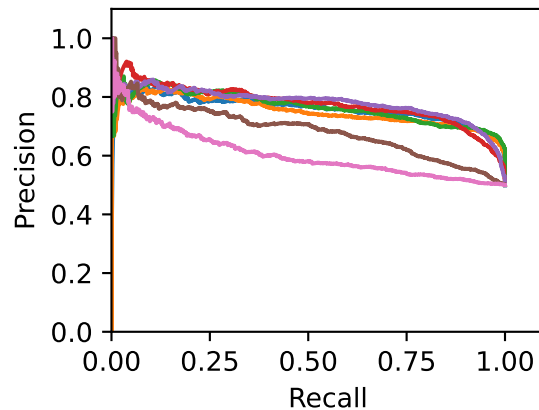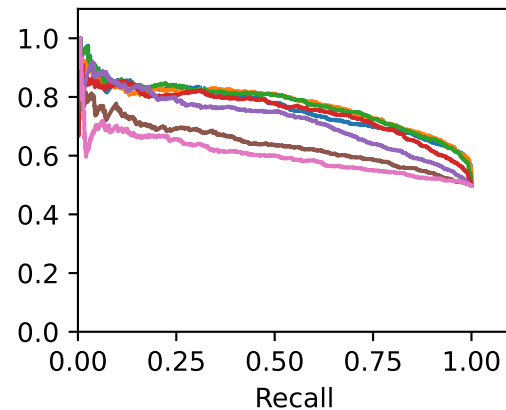

- neg100 Neutral vs Sweep AUC: 0.97
- neg50 Neutral vs Sweep AUC: 0.98
- 0 Neutral vs Sweep AUC: 0.98
- 25 Neutral vs Sweep AUC: 0.97
- 50 Neutral vs Sweep AUC: 0.98
- 100 Neutral vs Sweep AUC: 0.97
- 200 Neutral vs Sweep AUC: 0.84

- neg100 SDN vs SSV AUC: 0.76
- neg50 SDN vs SSV AUC: 0.75
- 0 SDN vs SSV AUC: 0.77
- 25 SDN vs SSV AUC: 0.78
- 50 SDN vs SSV AUC: 0.78
- 100 SDN vs SSV AUC: 0.69
- 200 SDN vs SSV AUC: 0.61

- neg100 Neutral vs Sweep AUC: 0.91
- neg50 Neutral vs Sweep AUC: 0.94
- 0 Neutral vs Sweep AUC: 0.95
- 25 Neutral vs Sweep AUC: 0.94
- 50 Neutral vs Sweep AUC: 0.94
- 100 Neutral vs Sweep AUC: 0.93
- 200 Neutral vs Sweep AUC: 0.86

- neg100 SDN vs SSV AUC: 0.76
- neg50 SDN vs SSV AUC: 0.78
- 0 SDN vs SSV AUC: 0.78
- 25 SDN vs SSV AUC: 0.75
- 50 SDN vs SSV AUC: 0.72
- 100 SDN vs SSV AUC: 0.64
- 200 SDN vs SSV AUC: 0.6
