# Supplementary material
Source: publisher figshare collection journal article supplement (https://gsajournals.figshare.com/articles/dataset/_/22584583)

# Number of Replicates PR Curves

## AFT

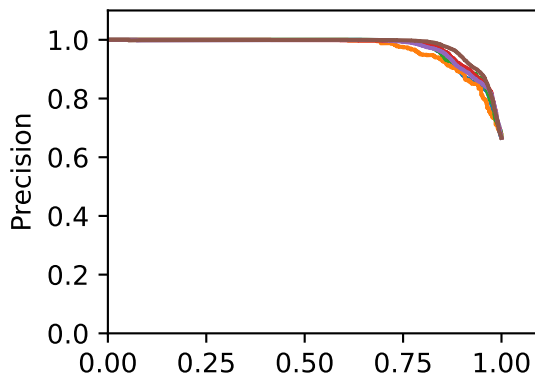

## HFT

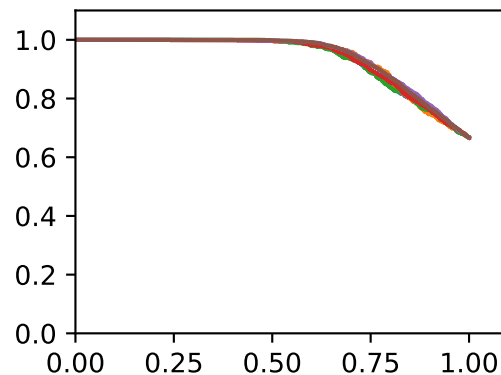

- 1k Neutral vs Sweep AUC: 0.98
- 2k Neutral vs Sweep AUC: 0.97
- 5k Neutral vs Sweep AUC: 0.98
- 10k Neutral vs Sweep AUC: 0.98
- 20k Neutral vs Sweep AUC: 0.98
- 30k Neutral vs Sweep AUC: 0.98

- 1k Neutral vs Sweep AUC: 0.94
- 2k Neutral vs Sweep AUC: 0.94
- 5k Neutral vs Sweep AUC: 0.94
- 10k Neutral vs Sweep AUC: 0.94
- 20k Neutral vs Sweep AUC: 0.94
- 30k Neutral vs Sweep AUC: 0.94

- 1k SDN vs SSV AUC: 0.69
- 2k SDN vs SSV AUC: 0.66
- 5k SDN vs SSV AUC: 0.68
- 10k SDN vs SSV AUC: 0.68
- 20k SDN vs SSV AUC: 0.7
- 30k SDN vs SSV AUC: 0.72

- 1k SDN vs SSV AUC: 0.68
- 2k SDN vs SSV AUC: 0.67
- 5k SDN vs SSV AUC: 0.67
- 10k SDN vs SSV AUC: 0.71
- 20k SDN vs SSV AUC: 0.69
- 30k SDN vs SSV AUC: 0.72

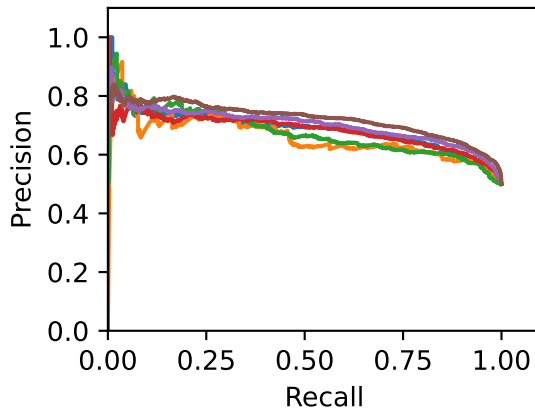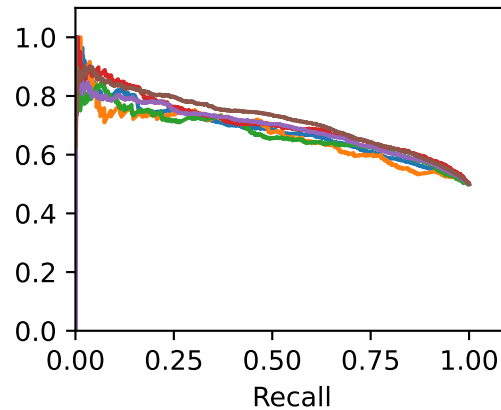

Supplement: Supplementary file 15 [file 1]
