# Supplementary material
Source: publisher figshare collection journal article supplement (https://gsajournals.figshare.com/articles/dataset/_/22584583)
Supplement: Supplementary file 16 [file 1]

# Selection Coefficient ROC Curves

AFT

HFT

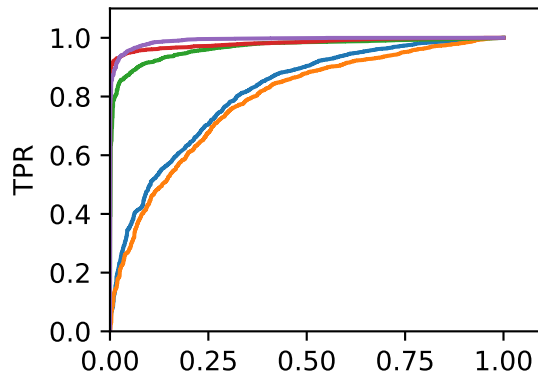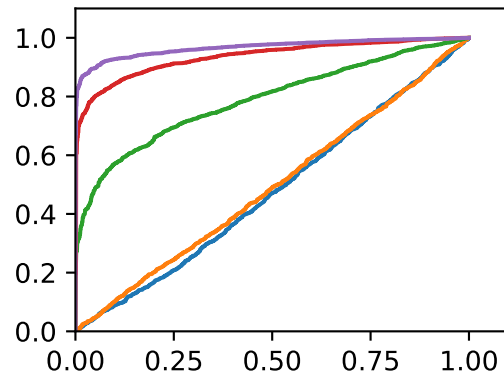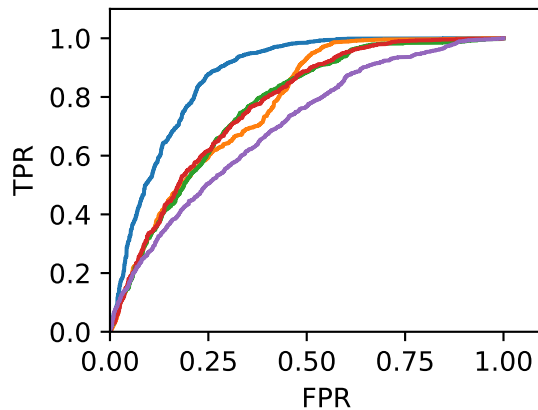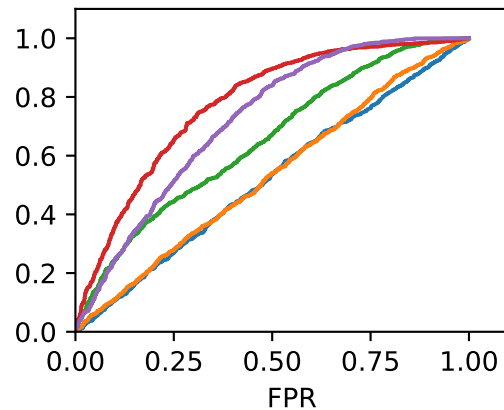

- s=0.005 Neutral vs Sweep AUC: 0.81
- s=0.01 Neutral vs Sweep AUC: 0.79
- s=0.05 Neutral vs Sweep AUC: 0.97
- s=0.10 Neutral vs Sweep AUC: 0.98
- s=0.50 Neutral vs Sweep AUC: 0.99

- s=0.005 Neutral vs Sweep AUC: 0.48
- s=0.01 Neutral vs Sweep AUC: 0.49
- s=0.05 Neutral vs Sweep AUC: 0.79
- s=0.10 Neutral vs Sweep AUC: 0.94
- s=0.50 Neutral vs Sweep AUC: 0.97

- s=0.005 SDN vs SSV AUC: 0.87
- s=0.01 SDN vs SSV AUC: 0.77
- s=0.05 SDN vs SSV AUC: 0.77
- s=0.10 SDN vs SSV AUC: 0.77
- s=0.50 SDN vs SSV AUC: 0.7

- s=0.005 SDN vs SSV AUC: 0.52
- s=0.01 SDN vs SSV AUC: 0.53
- s=0.05 SDN vs SSV AUC: 0.65
- s=0.10 SDN vs SSV AUC: 0.78
- s=0.50 SDN vs SSV AUC: 0.72
