# Supplementary material
Source: publisher figshare collection journal article supplement (https://gsajournals.figshare.com/articles/dataset/_/22584583)
Supplement: Supplementary file 17 [file 1]

Proportion of Sweep Calls Over Central 500 Polymorphisms

Proportion of Sweep Calls

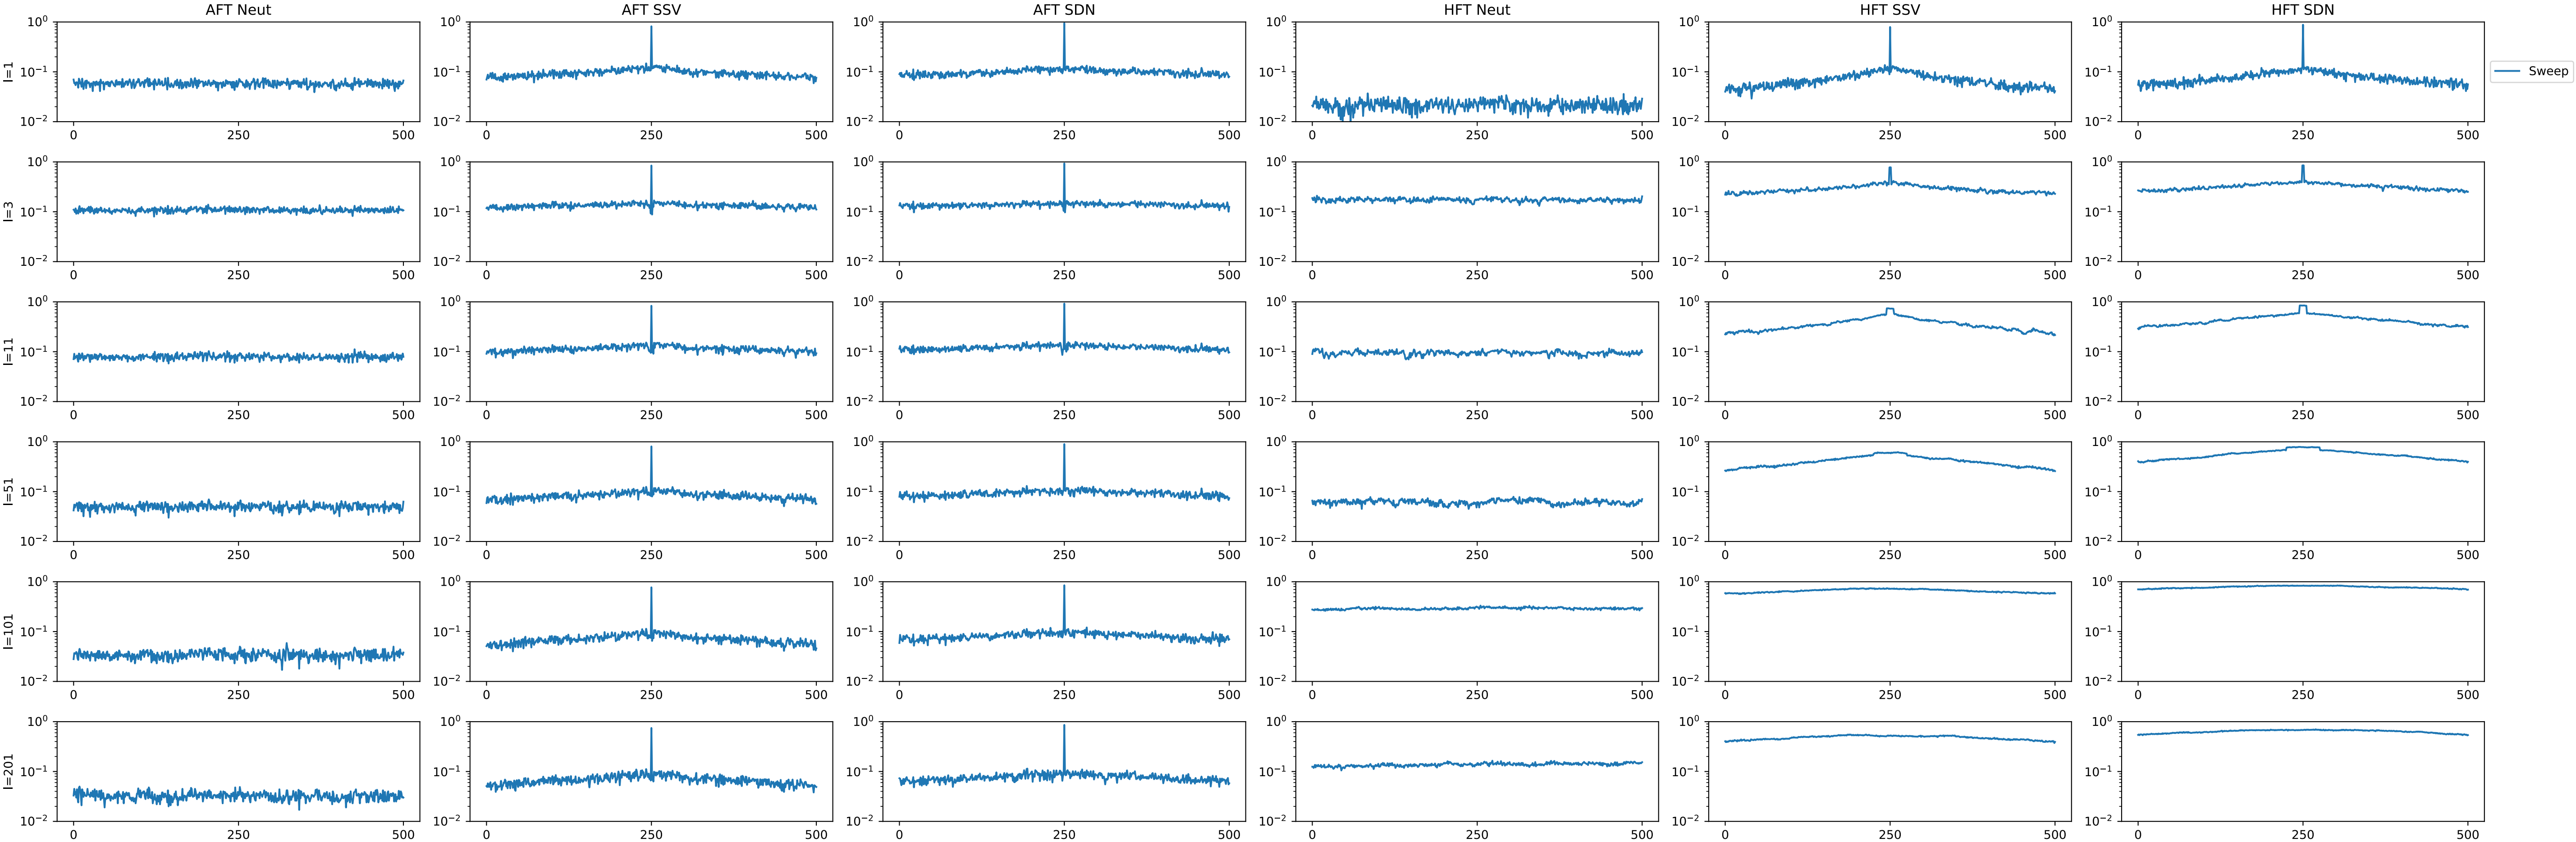

Polymorphisms
