# Supplementary material
Source: publisher figshare collection journal article supplement (https://gsajournals.figshare.com/articles/dataset/_/22584583)
Supplement: Supplementary file 18 [file 1]

# Number of Timepoints ROC Curves

AFT

HFT

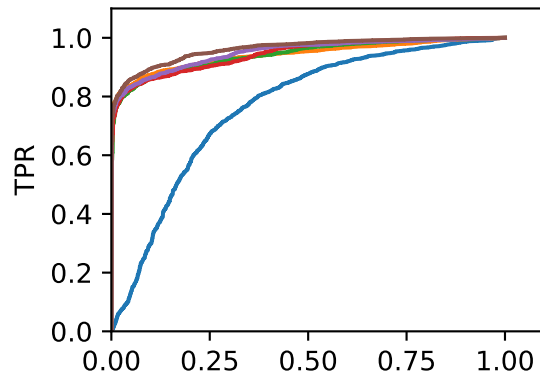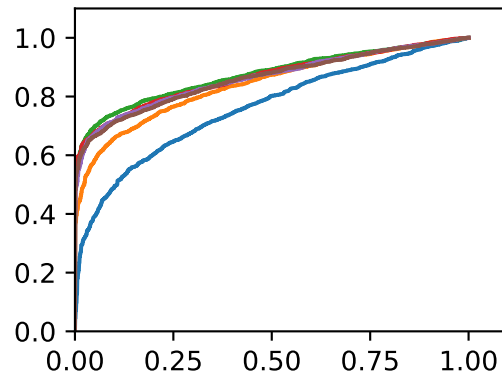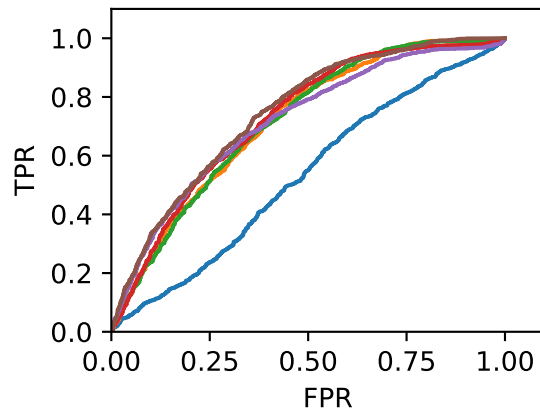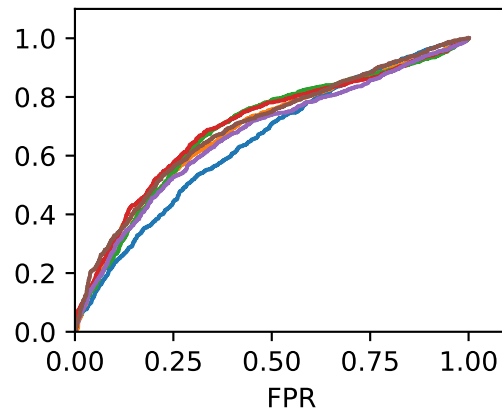

- 1 TP Neutral vs Sweep AUC: 0.76
- 2 TP Neutral vs Sweep AUC: 0.94
- 5 TP Neutral vs Sweep AUC: 0.94
- 10 TP Neutral vs Sweep AUC: 0.94
- 20 TP Neutral vs Sweep AUC: 0.95
- 40 TP Neutral vs Sweep AUC: 0.96

- 1 TP SDN vs SSV AUC: 0.53
- 2 TP SDN vs SSV AUC: 0.72
- 5 TP SDN vs SSV AUC: 0.72
- 10 TP SDN vs SSV AUC: 0.73
- 20 TP SDN vs SSV AUC: 0.72
- 40 TP SDN vs SSV AUC: 0.75

- 1 TP Neutral vs Sweep AUC: 0.76
- 2 TP Neutral vs Sweep AUC: 0.84
- 5 TP Neutral vs Sweep AUC: 0.87
- 10 TP Neutral vs Sweep AUC: 0.87
- 20 TP Neutral vs Sweep AUC: 0.86
- 40 TP Neutral vs Sweep AUC: 0.86

- 1 TP SDN vs SSV AUC: 0.65
- 2 TP SDN vs SSV AUC: 0.68
- 5 TP SDN vs SSV AUC: 0.69
- 10 TP SDN vs SSV AUC: 0.7
- 20 TP SDN vs SSV AUC: 0.67
- 40 TP SDN vs SSV AUC: 0.7
