# Supplementary material
Source: publisher figshare collection journal article supplement (https://gsajournals.figshare.com/articles/dataset/_/22584583)
Supplement: Supplementary file 23 [file 1]

# Selection Coefficient PR Curves

AFT

HFT

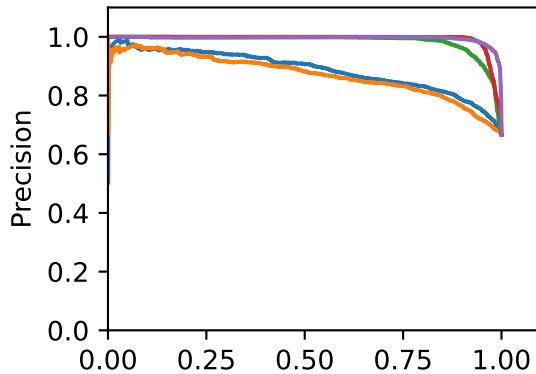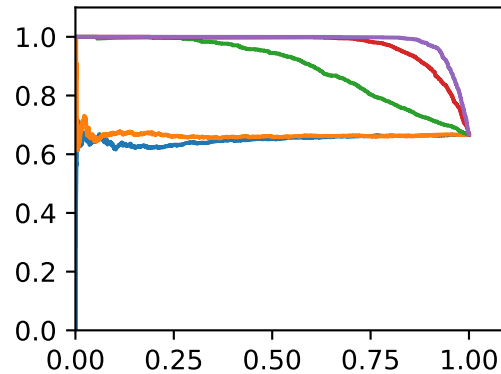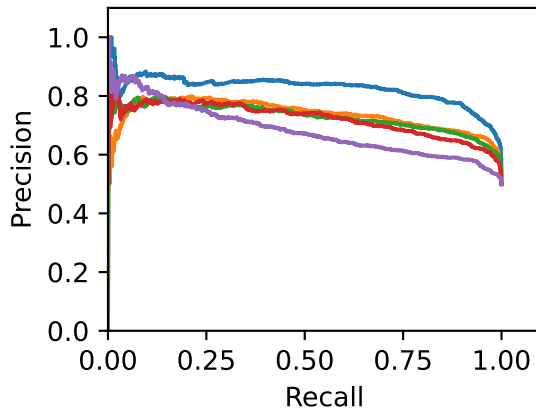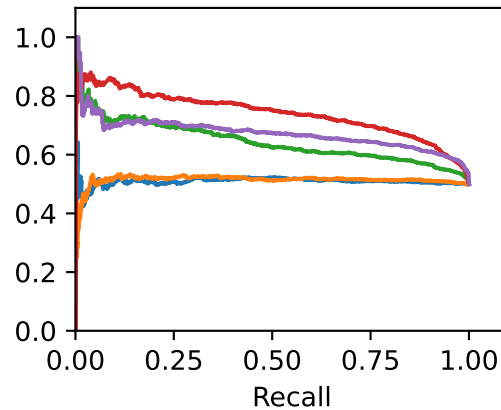

- s=0.005 Neutral vs Sweep AUC: 0.89
- s=0.01 Neutral vs Sweep AUC: 0.87
- s=0.05 Neutral vs Sweep AUC: 0.98
- s=0.10 Neutral vs Sweep AUC: 0.99
- s=0.50 Neutral vs Sweep AUC: 1.0

- s=0.005 Neutral vs Sweep AUC: 0.65
- s=0.01 Neutral vs Sweep AUC: 0.66
- s=0.05 Neutral vs Sweep AUC: 0.9
- s=0.10 Neutral vs Sweep AUC: 0.97
- s=0.50 Neutral vs Sweep AUC: 0.99

- s=0.005 SDN vs SSV AUC: 0.83
- s=0.01 SDN vs SSV AUC: 0.74
- s=0.05 SDN vs SSV AUC: 0.73
- s=0.10 SDN vs SSV AUC: 0.72
- s=0.50 SDN vs SSV AUC: 0.68

- s=0.005 SDN vs SSV AUC: 0.51
- s=0.01 SDN vs SSV AUC: 0.51
- s=0.05 SDN vs SSV AUC: 0.65
- s=0.10 SDN vs SSV AUC: 0.74
- s=0.50 SDN vs SSV AUC: 0.67
