# Supplementary material
Source: publisher figshare collection journal article supplement (https://gsajournals.figshare.com/articles/dataset/_/22584583)

Input Representations for Timesweeper

Individual Replicate 1

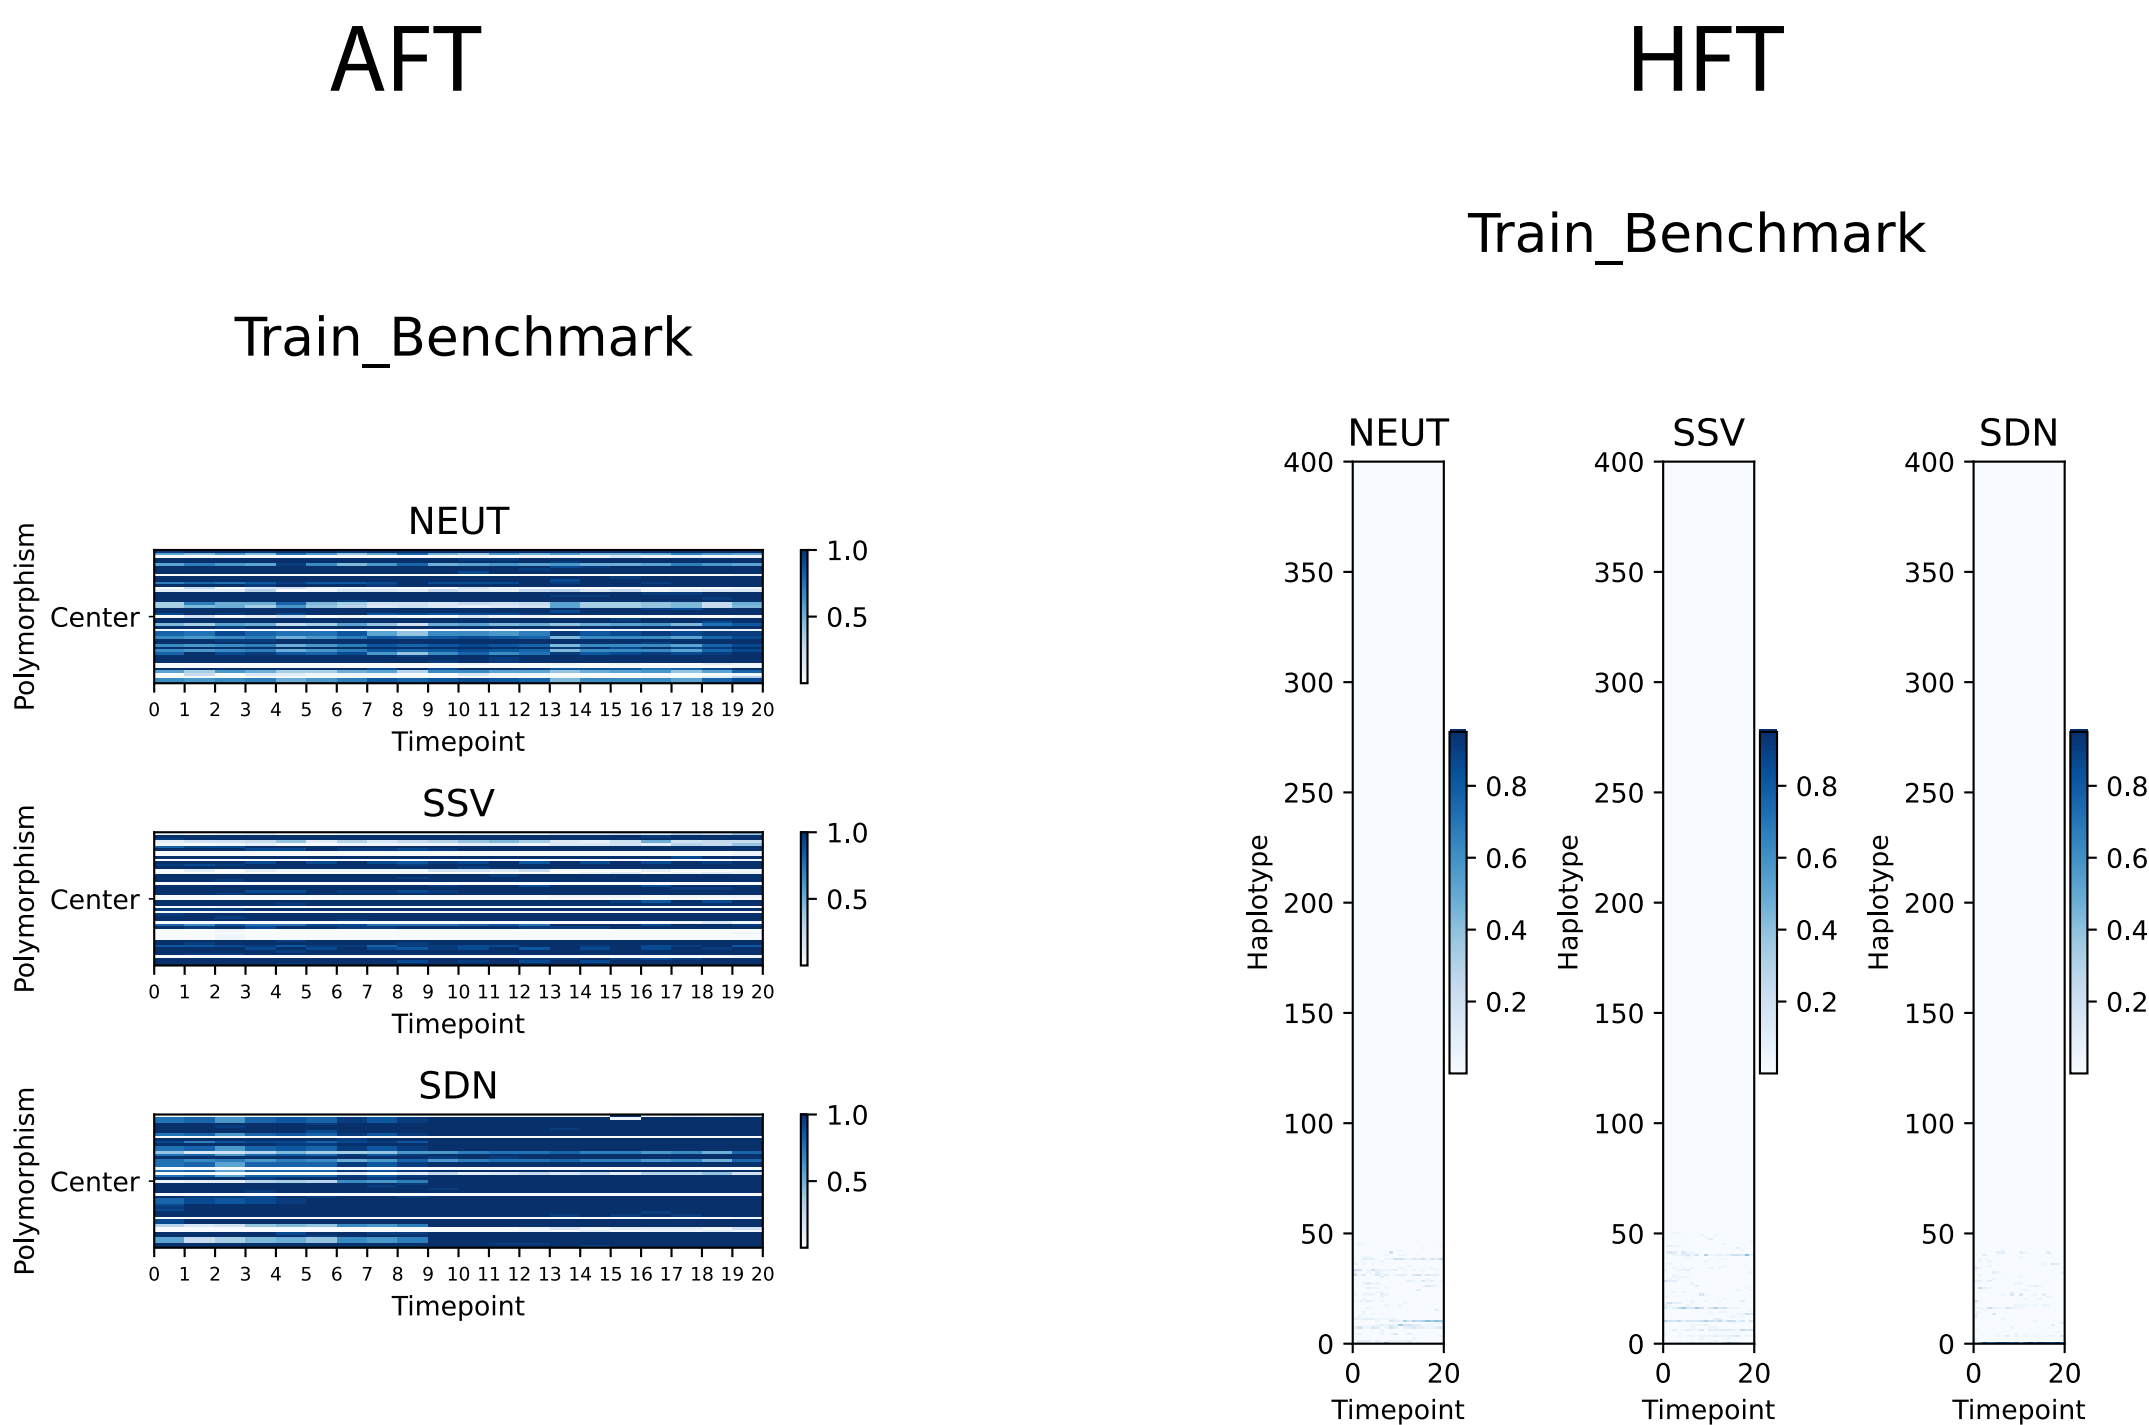

Individual Replicate 2

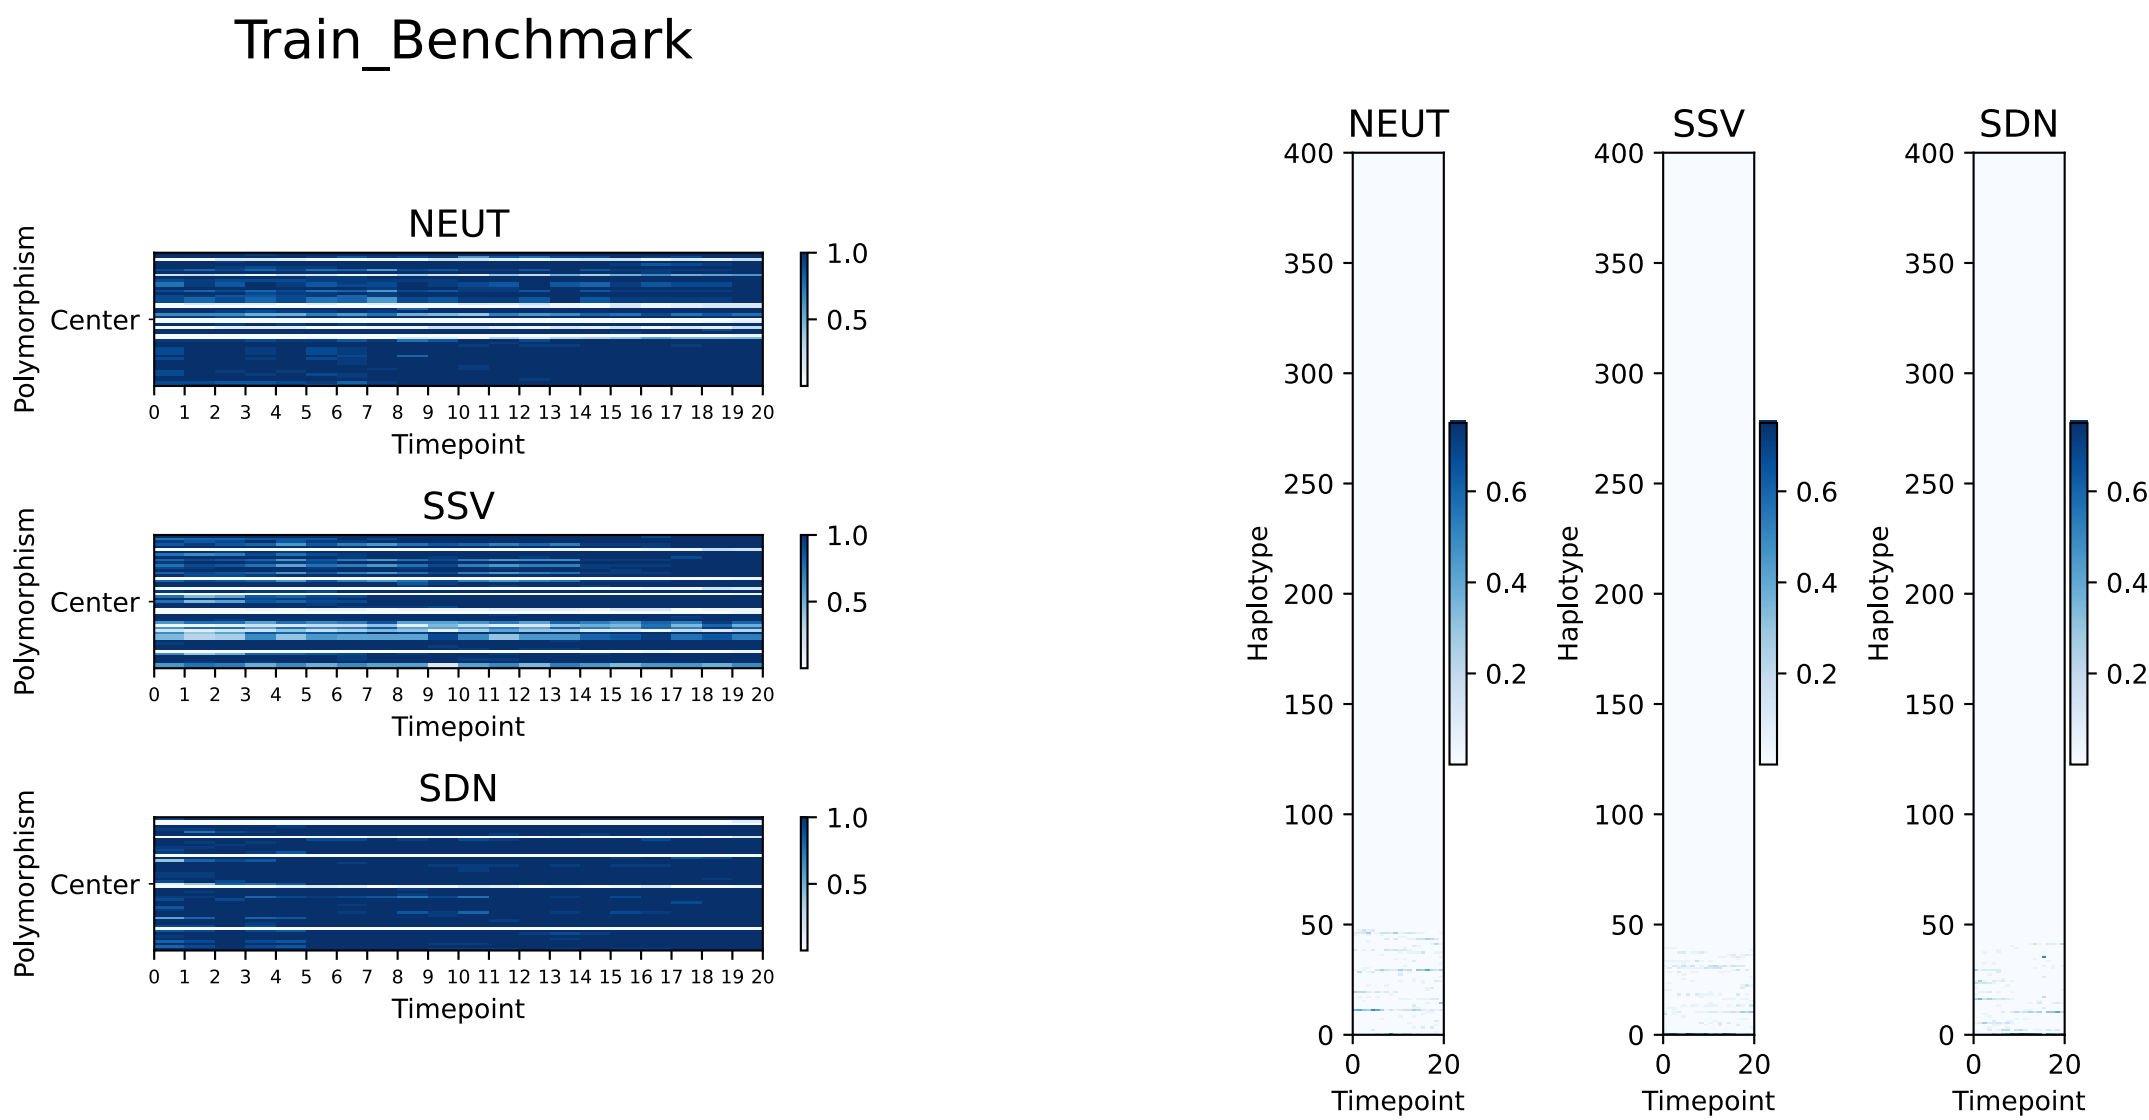

Zoomed Mean Inputs

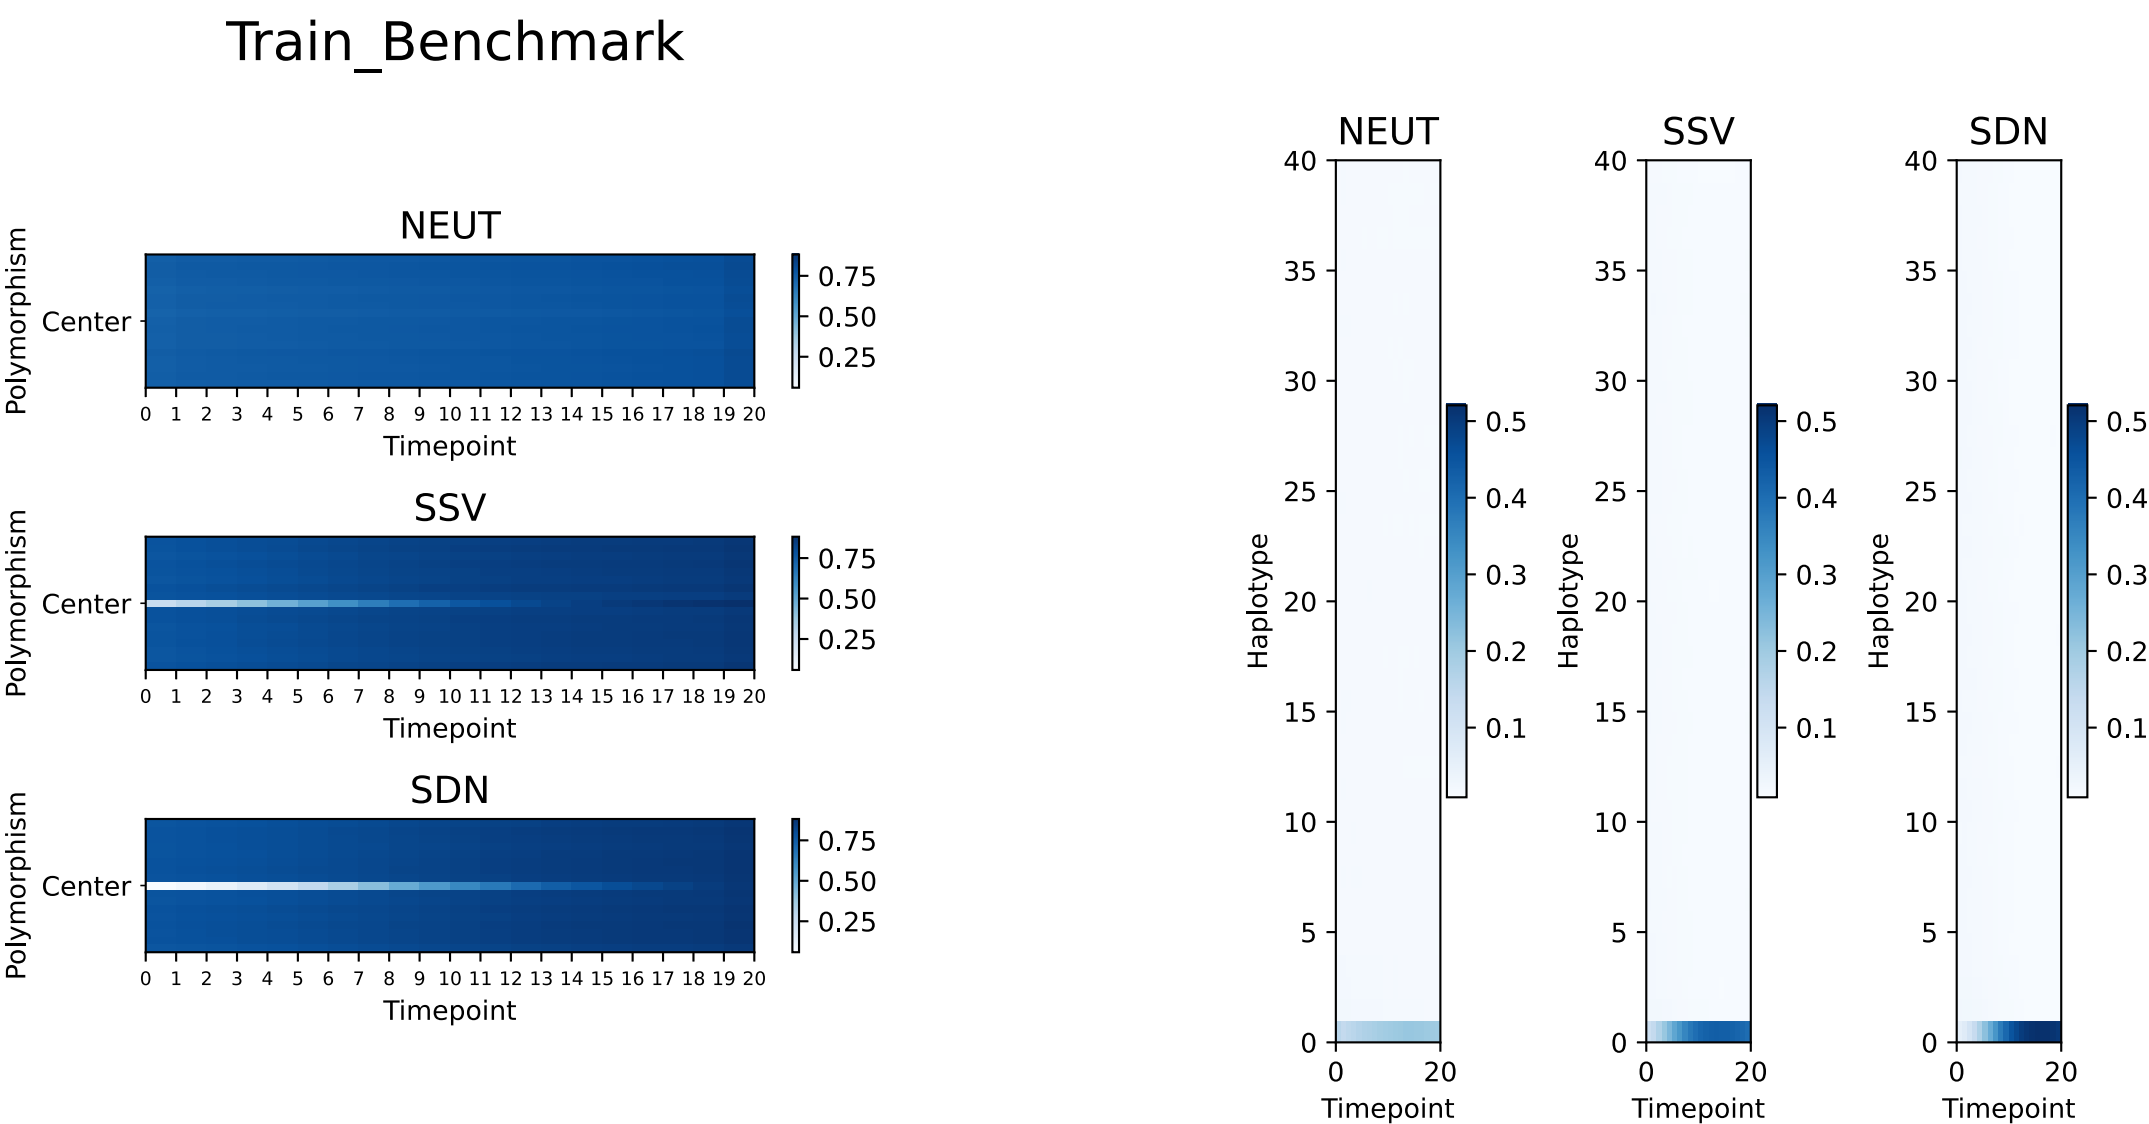

Mean Inputs

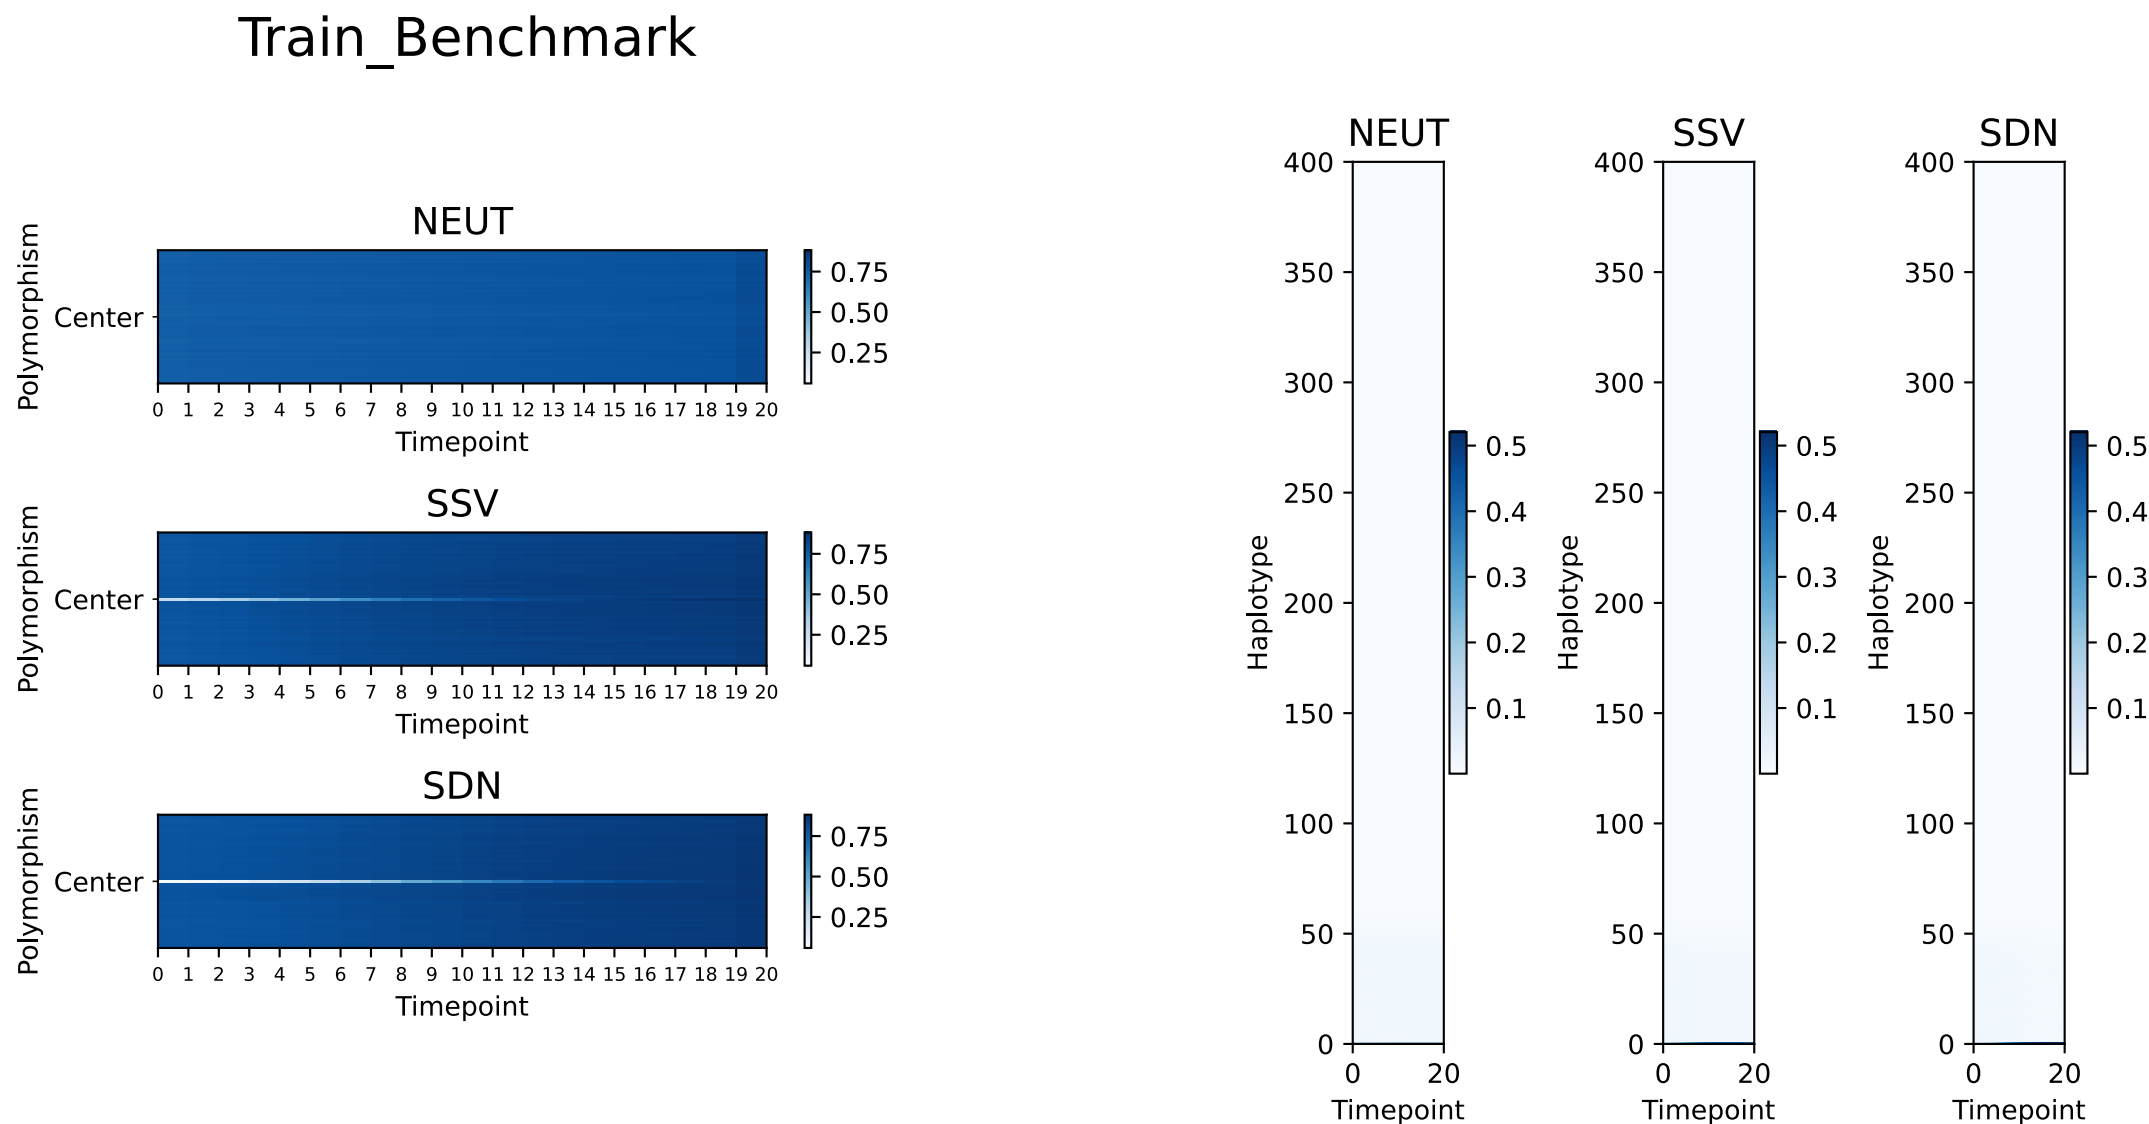

Supplement: Supplementary file 29 [file 1]
