# Supplementary material
Source: publisher figshare collection journal article supplement (https://gsajournals.figshare.com/articles/dataset/_/22584583)
Supplement: Supplementary file 30 [file 1]

# Number of Timepoints PR Curves

AFT

HFT

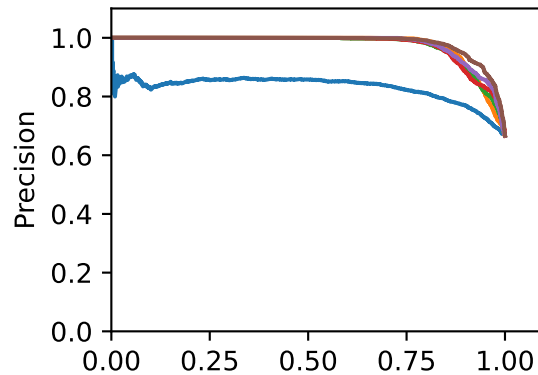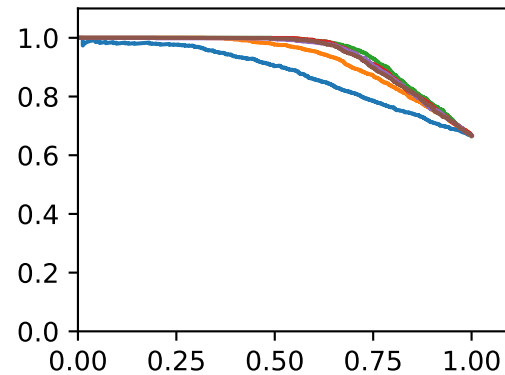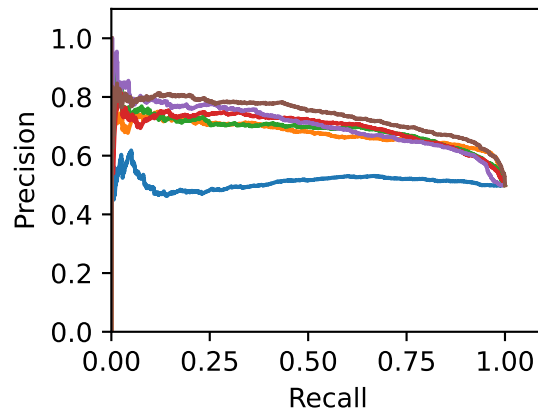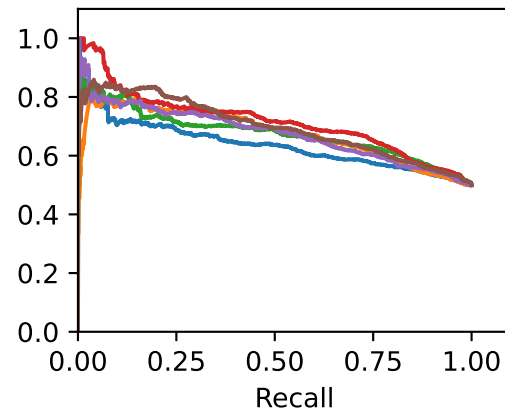

- 1 TP Neutral vs Sweep AUC: 0.83
- 2 TP Neutral vs Sweep AUC: 0.98
- 5 TP Neutral vs Sweep AUC: 0.97
- 10 TP Neutral vs Sweep AUC: 0.98
- 20 TP Neutral vs Sweep AUC: 0.98
- 40 TP Neutral vs Sweep AUC: 0.98

- 1 TP SDN vs SSV AUC: 0.51
- 2 TP SDN vs SSV AUC: 0.68
- 5 TP SDN vs SSV AUC: 0.69
- 10 TP SDN vs SSV AUC: 0.7
- 20 TP SDN vs SSV AUC: 0.71
- 40 TP SDN vs SSV AUC: 0.74

- 1 TP Neutral vs Sweep AUC: 0.88
- 2 TP Neutral vs Sweep AUC: 0.93
- 5 TP Neutral vs Sweep AUC: 0.95
- 10 TP Neutral vs Sweep AUC: 0.94
- 20 TP Neutral vs Sweep AUC: 0.94
- 40 TP Neutral vs Sweep AUC: 0.94

- 1 TP SDN vs SSV AUC: 0.64
- 2 TP SDN vs SSV AUC: 0.67
- 5 TP SDN vs SSV AUC: 0.68
- 10 TP SDN vs SSV AUC: 0.72
- 20 TP SDN vs SSV AUC: 0.68
- 40 TP SDN vs SSV AUC: 0.7
