# Supplementary material
Source: publisher figshare collection journal article supplement (https://gsajournals.figshare.com/articles/dataset/_/22584583)
Supplement: Supplementary file 32 [file 1]

## Sample Size ROC Curves

AFT

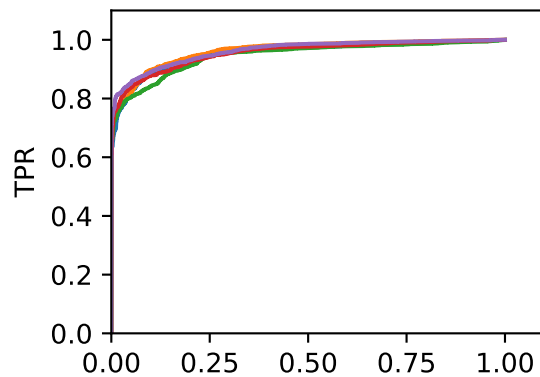

HFT

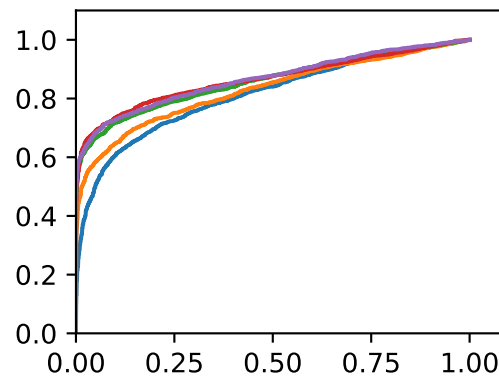

FPR

FPR

- Sample Size 1 Neutral vs Sweep AUC: 0.95
- Sample Size 2 Neutral vs Sweep AUC: 0.96
- Sample Size 5 Neutral vs Sweep AUC: 0.95
- Sample Size 10 Neutral vs Sweep AUC: 0.96
- Sample Size 20 Neutral vs Sweep AUC: 0.96

- Sample Size 1 Neutral vs Sweep AUC: 0.81
- Sample Size 2 Neutral vs Sweep AUC: 0.83
- Sample Size 5 Neutral vs Sweep AUC: 0.86
- Sample Size 10 Neutral vs Sweep AUC: 0.87
- Sample Size 20 Neutral vs Sweep AUC: 0.87

- Sample Size 1 SDN vs SSV AUC: 0.67
- Sample Size 2 SDN vs SSV AUC: 0.69
- Sample Size 5 SDN vs SSV AUC: 0.68
- Sample Size 10 SDN vs SSV AUC: 0.71
- Sample Size 20 SDN vs SSV AUC: 0.7

- Sample Size 1 SDN vs SSV AUC: 0.61
- Sample Size 2 SDN vs SSV AUC: 0.66
- Sample Size 5 SDN vs SSV AUC: 0.66
- Sample Size 10 SDN vs SSV AUC: 0.68
- Sample Size 20 SDN vs SSV AUC: 0.68
