# Supplementary material
Source: publisher figshare collection journal article supplement (https://gsajournals.figshare.com/articles/dataset/_/22584583)
Supplement: Supplementary file 33 [file 1]

# Sample Size PR Curves

## AFT

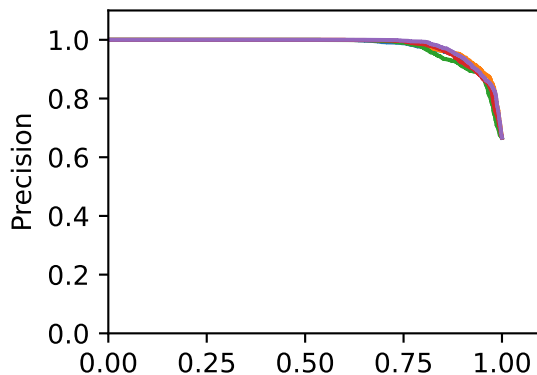

## HFT

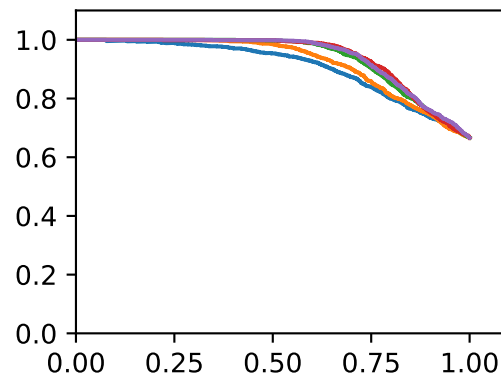

## AFT

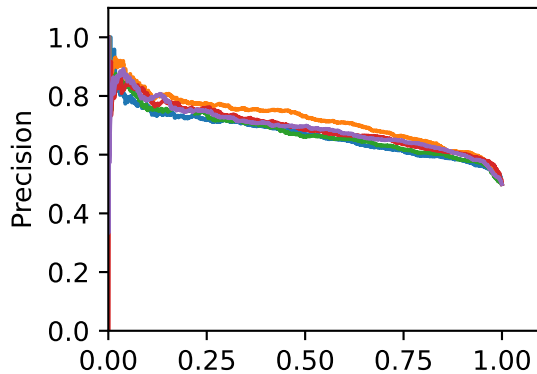

## HFT

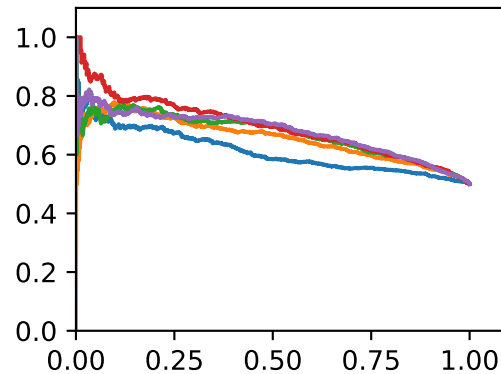

- Sample Size 1 Neutral vs Sweep AUC: 0.98
- Sample Size 2 Neutral vs Sweep AUC: 0.98
- Sample Size 5 Neutral vs Sweep AUC: 0.98
- Sample Size 10 Neutral vs Sweep AUC: 0.98
- Sample Size 20 Neutral vs Sweep AUC: 0.98

- Sample Size 1 SDN vs SSV AUC: 0.67
- Sample Size 2 SDN vs SSV AUC: 0.72
- Sample Size 5 SDN vs SSV AUC: 0.68
- Sample Size 10 SDN vs SSV AUC: 0.69
- Sample Size 20 SDN vs SSV AUC: 0.69

- Sample Size 1 Neutral vs Sweep AUC: 0.91
- Sample Size 2 Neutral vs Sweep AUC: 0.92
- Sample Size 5 Neutral vs Sweep AUC: 0.94
- Sample Size 10 Neutral vs Sweep AUC: 0.94
- Sample Size 20 Neutral vs Sweep AUC: 0.94

- Sample Size 1 SDN vs SSV AUC: 0.61
- Sample Size 2 SDN vs SSV AUC: 0.66
- Sample Size 5 SDN vs SSV AUC: 0.67
- Sample Size 10 SDN vs SSV AUC: 0.69
- Sample Size 20 SDN vs SSV AUC: 0.68
