# Supplementary material
Source: publisher figshare collection journal article supplement (https://gsajournals.figshare.com/articles/dataset/_/22584583)

Classification - Sample Size

AFT

HFT

1 Individual

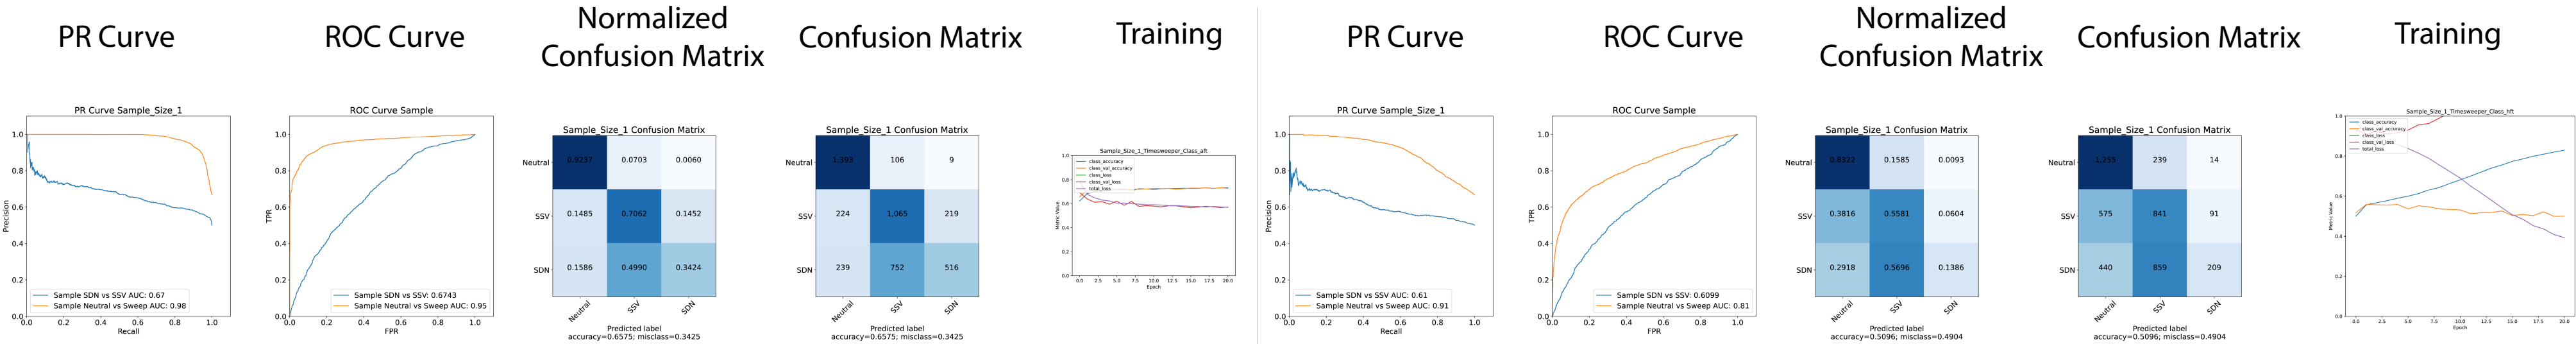

2 Individuals

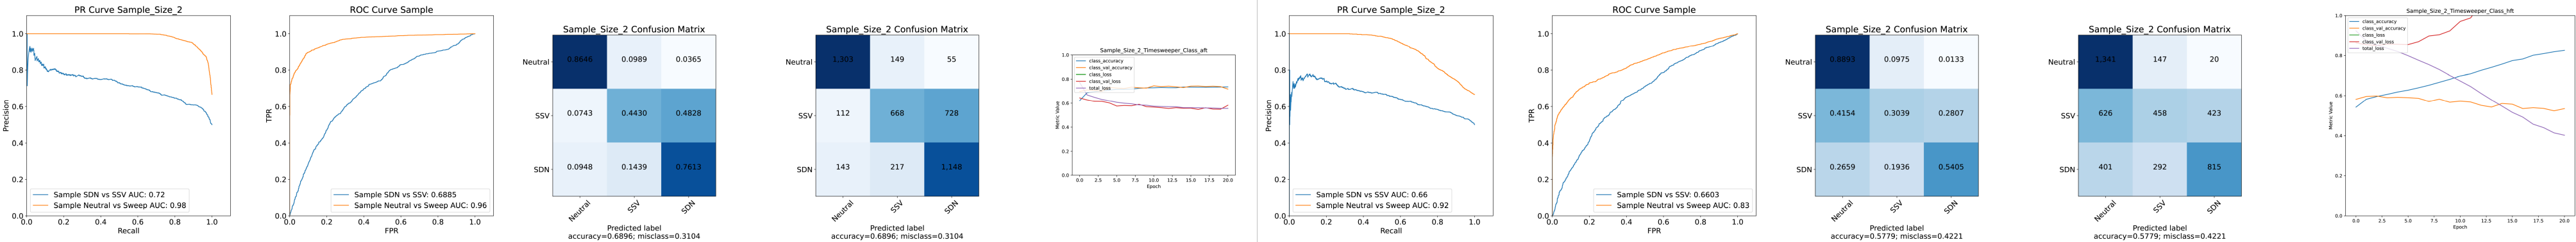

5 Individuals

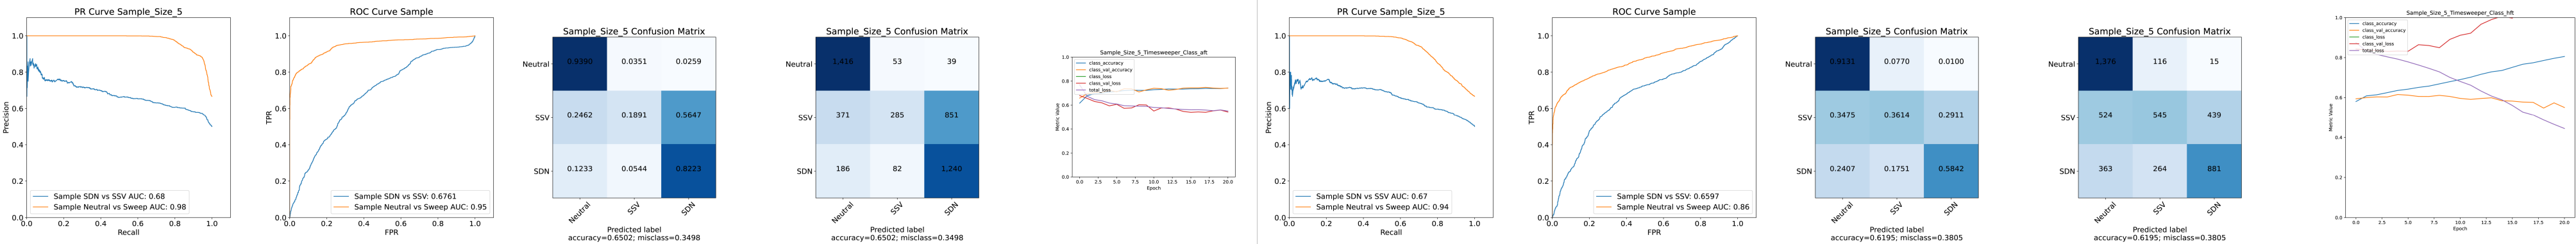

10 Individuals

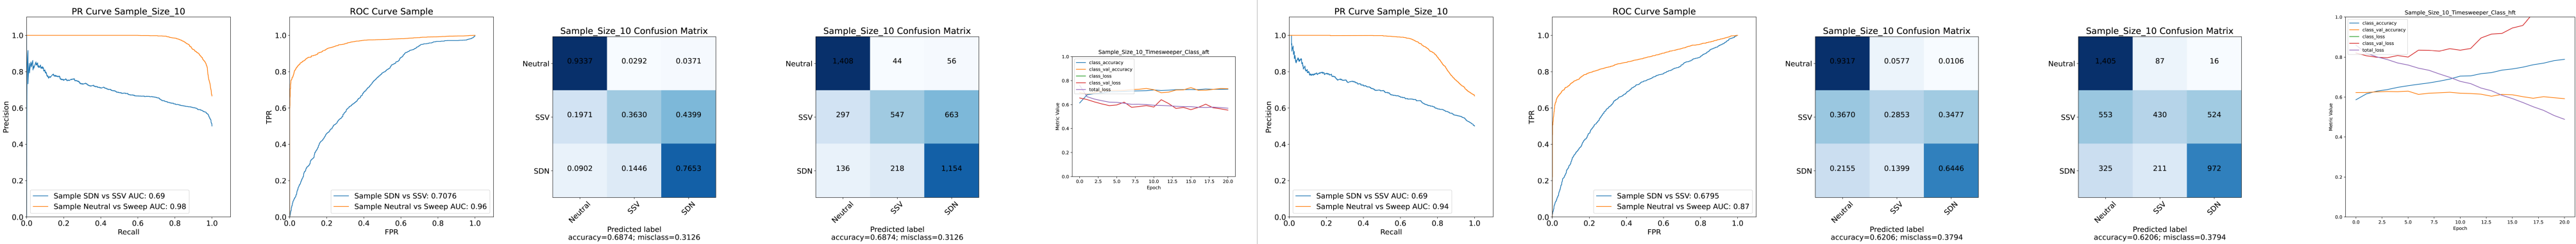

20 Individuals

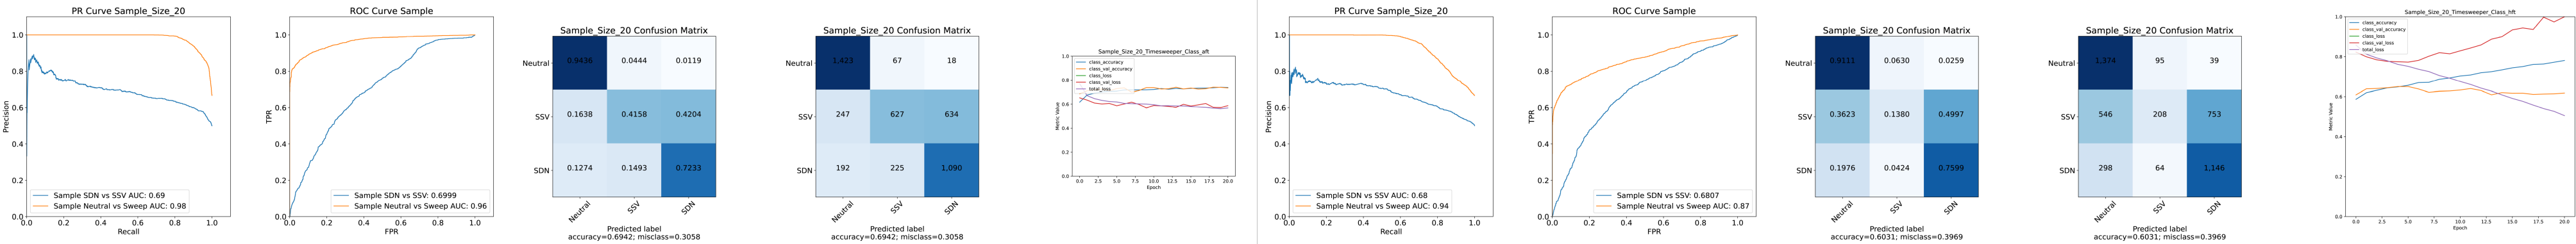

Supplement: Supplementary file 34 [file 1]
