# Supplementary material
Source: publisher figshare collection journal article supplement (https://gsajournals.figshare.com/articles/dataset/_/22584583)
Supplement: Supplementary file 35 [file 1]

# Post-Selection Sampling Start ROC Curves

## AFT

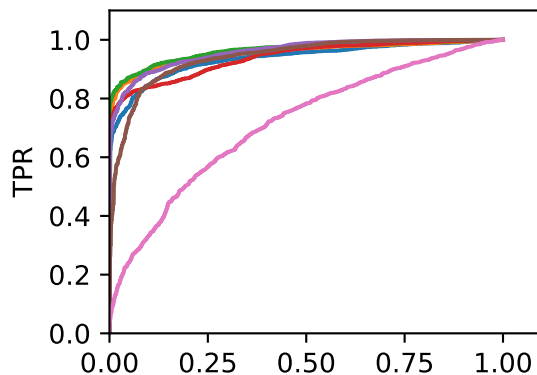

## HFT

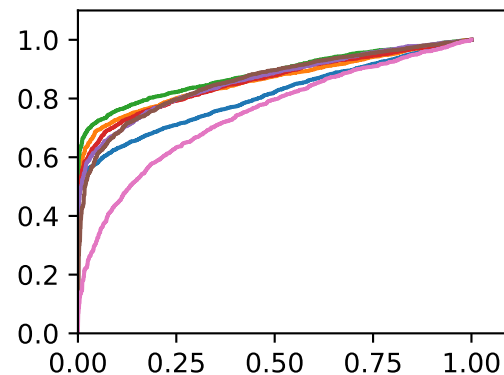

## FPR

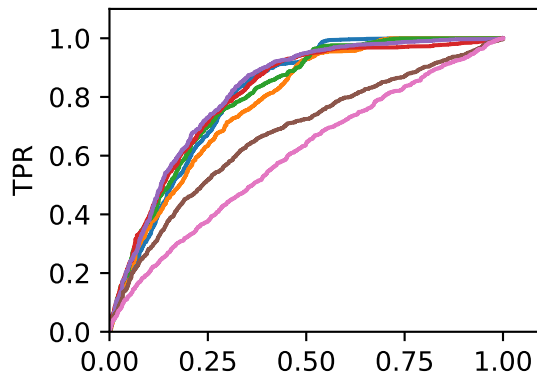

## FPR

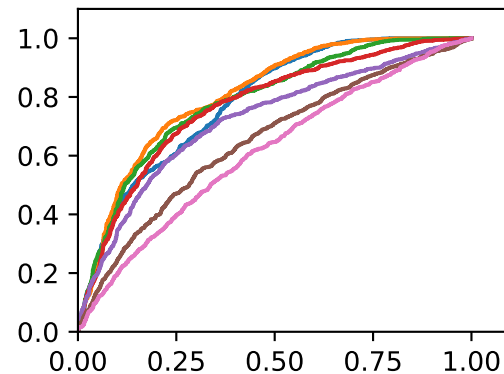

- neg100 Neutral vs Sweep AUC: 0.94
- neg50 Neutral vs Sweep AUC: 0.96
- 0 Neutral vs Sweep AUC: 0.96
- 25 Neutral vs Sweep AUC: 0.94
- 50 Neutral vs Sweep AUC: 0.96
- 100 Neutral vs Sweep AUC: 0.94
- 200 Neutral vs Sweep AUC: 0.72

- neg100 SDN vs SSV AUC: 0.81
- neg50 SDN vs SSV AUC: 0.78
- 0 SDN vs SSV AUC: 0.81
- 25 SDN vs SSV AUC: 0.81
- 50 SDN vs SSV AUC: 0.82
- 100 SDN vs SSV AUC: 0.67
- 200 SDN vs SSV AUC: 0.6

- neg100 Neutral vs Sweep AUC: 0.81
- neg50 Neutral vs Sweep AUC: 0.86
- 0 Neutral vs Sweep AUC: 0.88
- 25 Neutral vs Sweep AUC: 0.86
- 50 Neutral vs Sweep AUC: 0.86
- 100 Neutral vs Sweep AUC: 0.86
- 200 Neutral vs Sweep AUC: 0.75

- neg100 SDN vs SSV AUC: 0.78
- neg50 SDN vs SSV AUC: 0.81
- 0 SDN vs SSV AUC: 0.79
- 25 SDN vs SSV AUC: 0.77
- 50 SDN vs SSV AUC: 0.72
- 100 SDN vs SSV AUC: 0.65
- 200 SDN vs SSV AUC: 0.61
