# Supplementary material
Source: publisher figshare collection journal article supplement (https://gsajournals.figshare.com/articles/dataset/_/22584583)

# Regression - Window Sizes

AFT

HFT

I=1

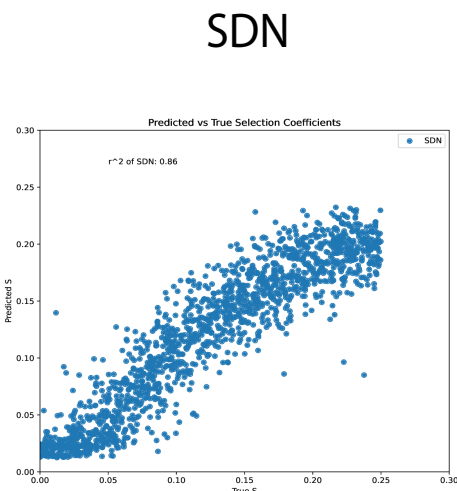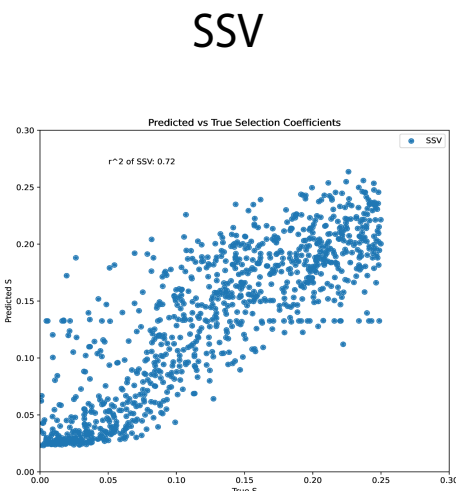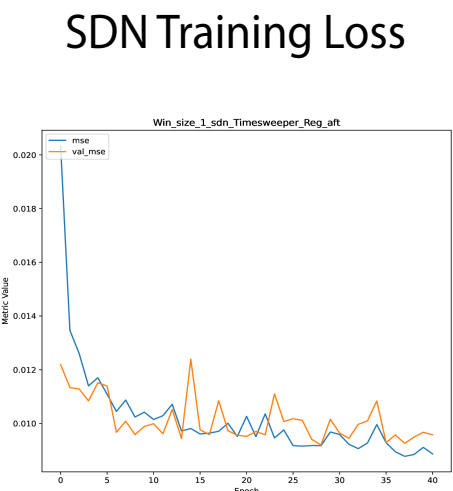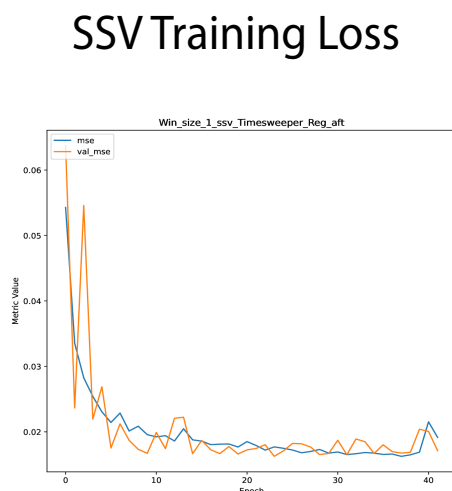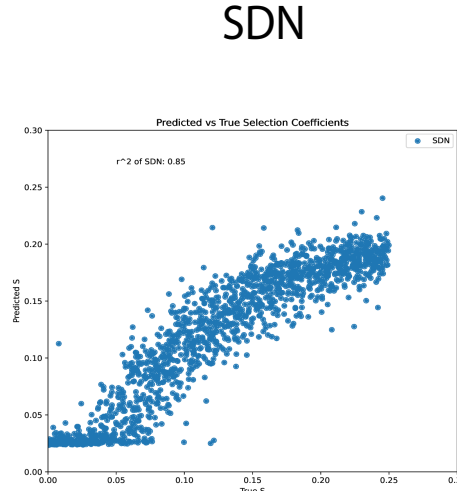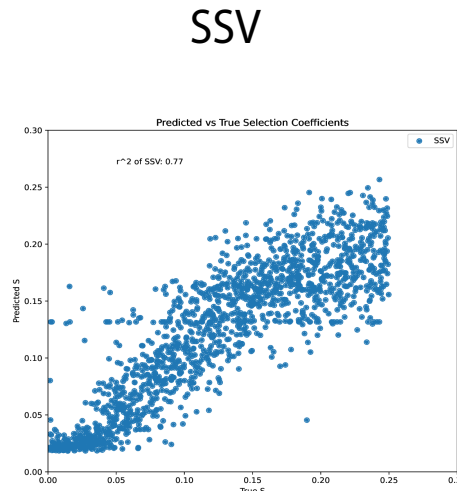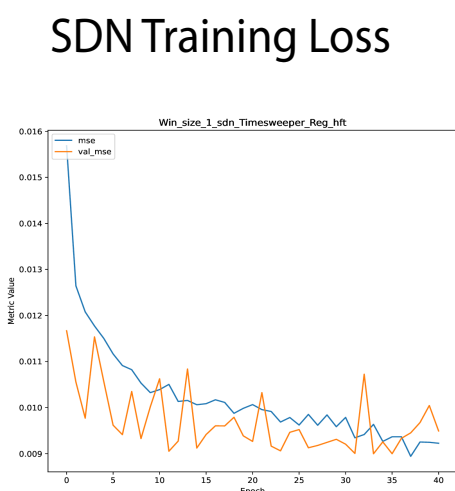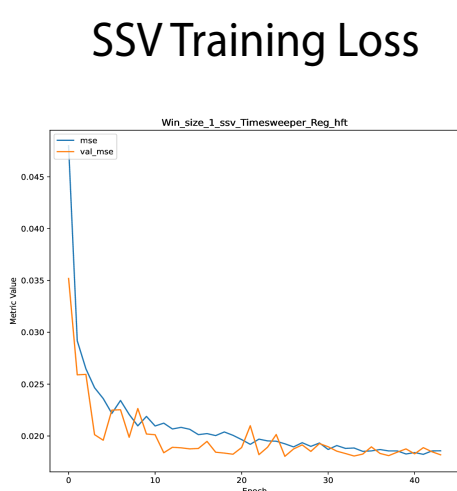

I=3

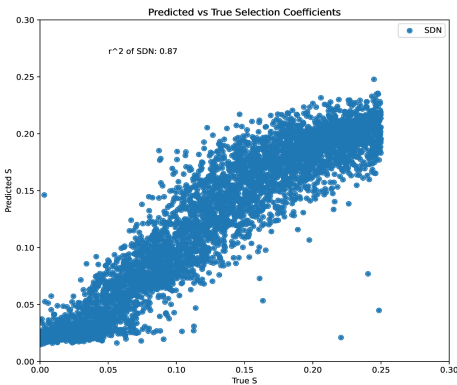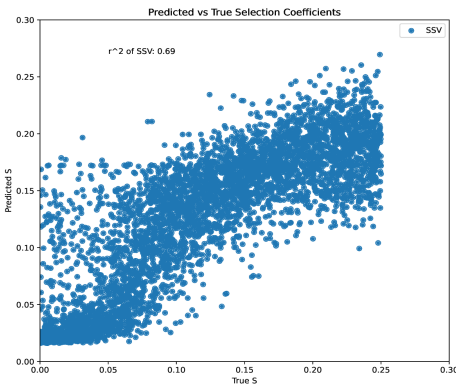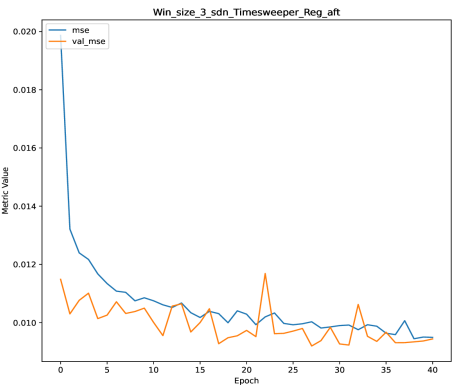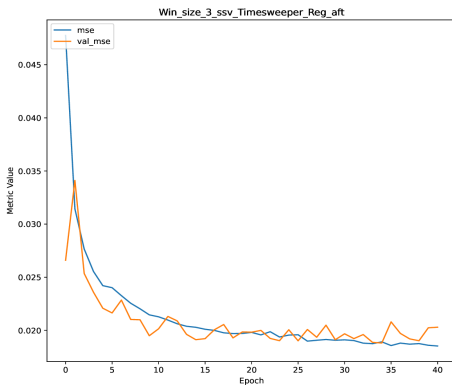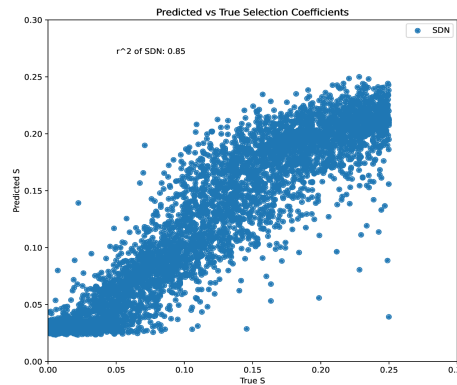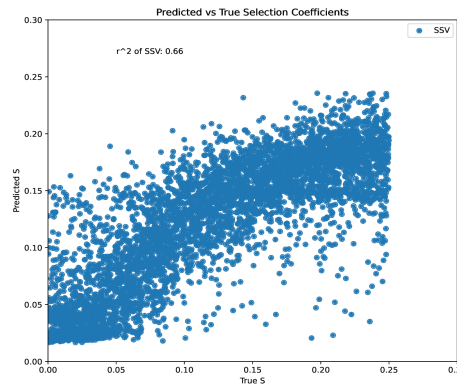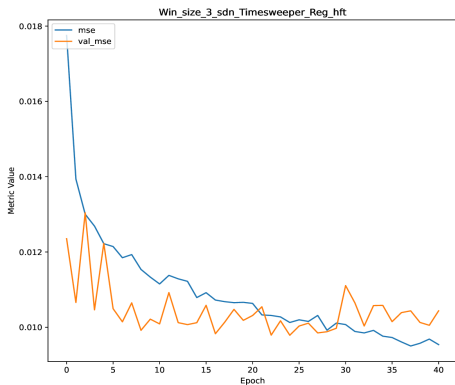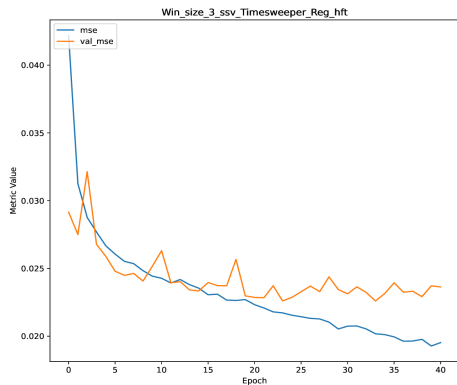

I=11

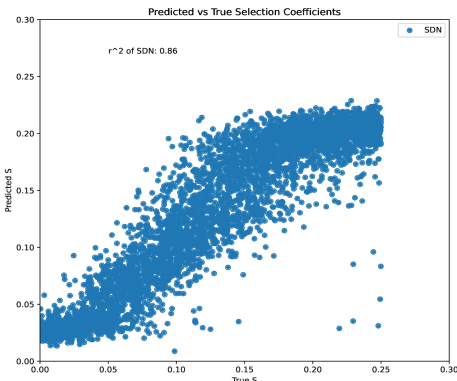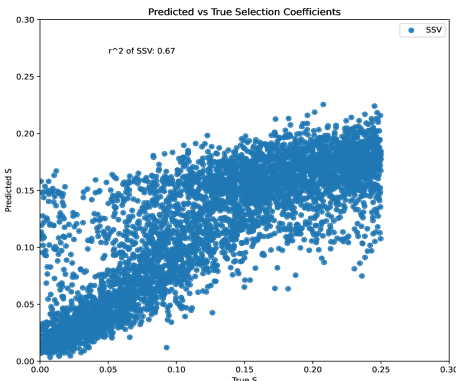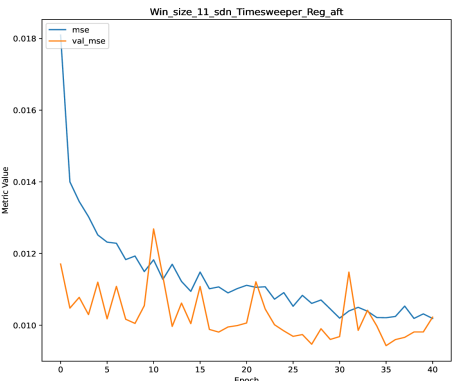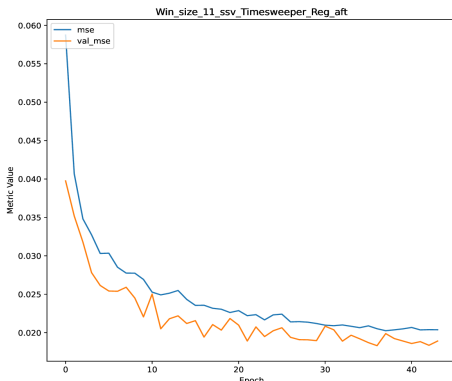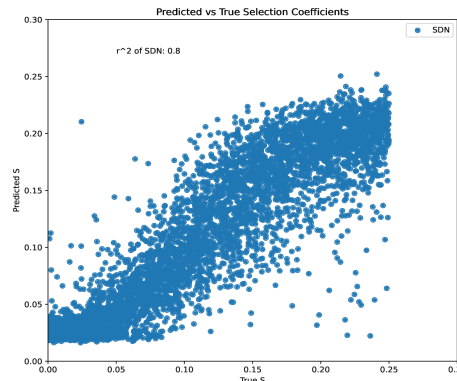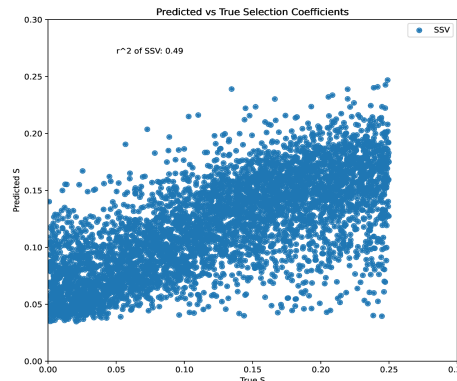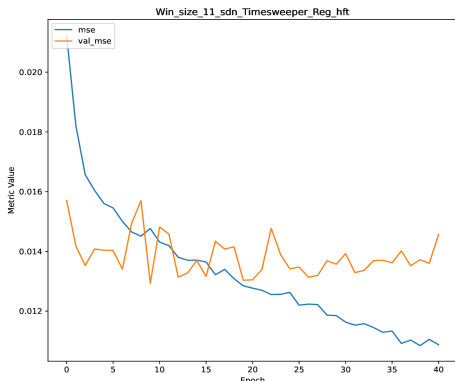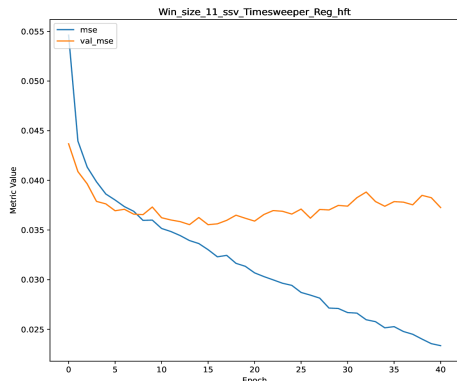

I=51

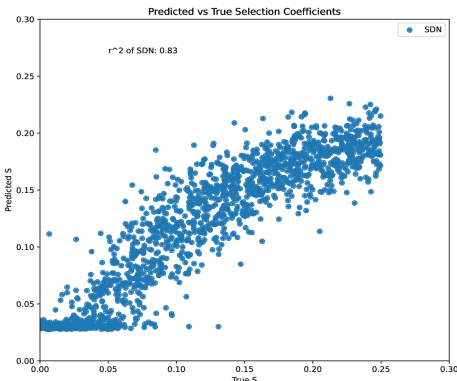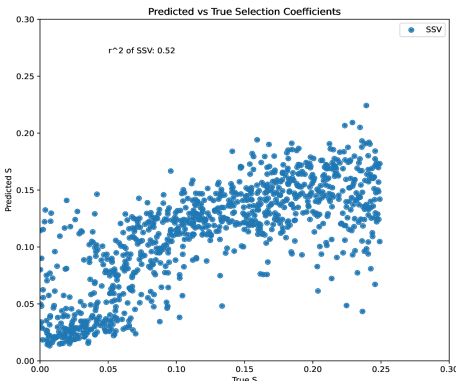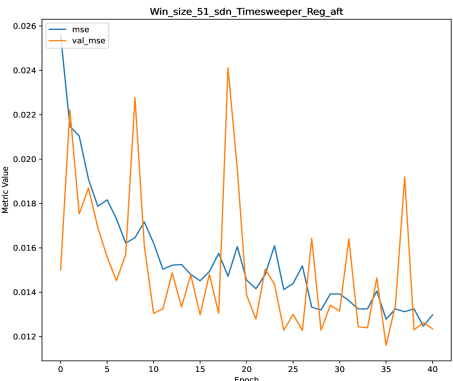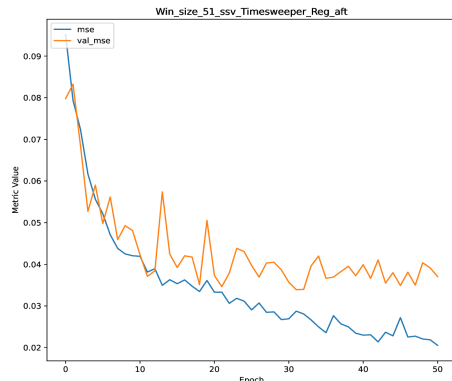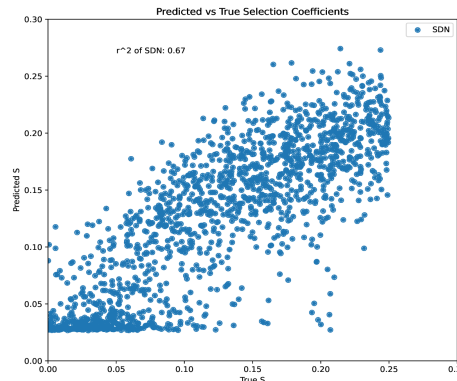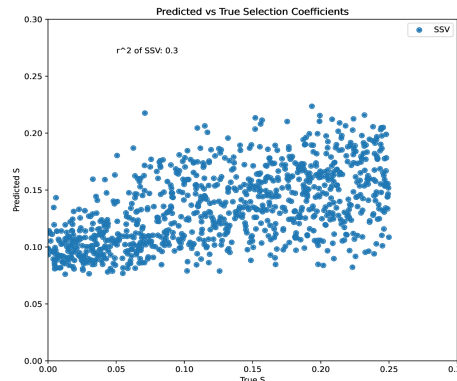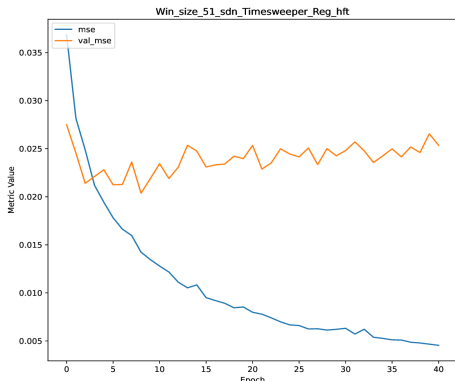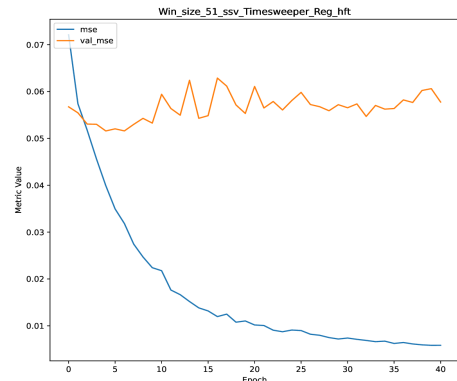

I=101

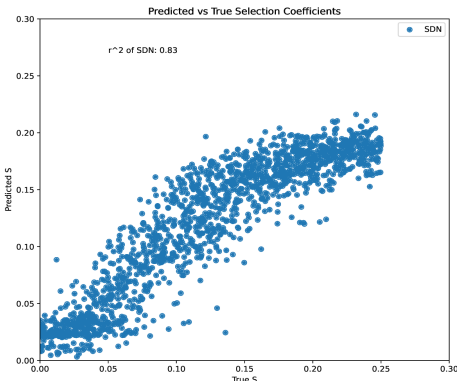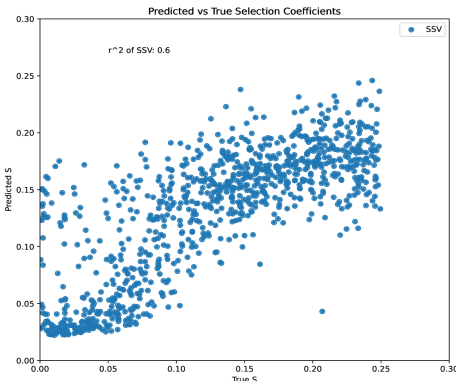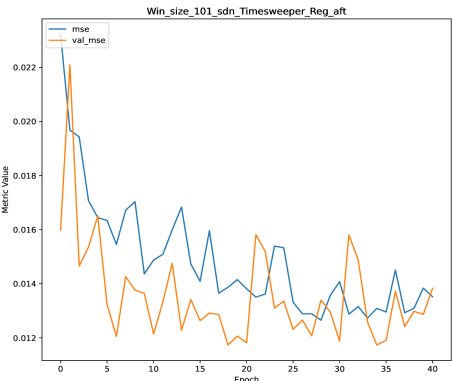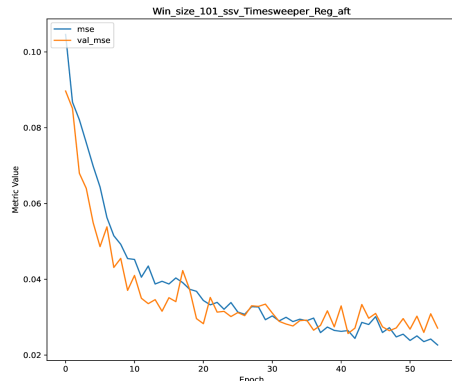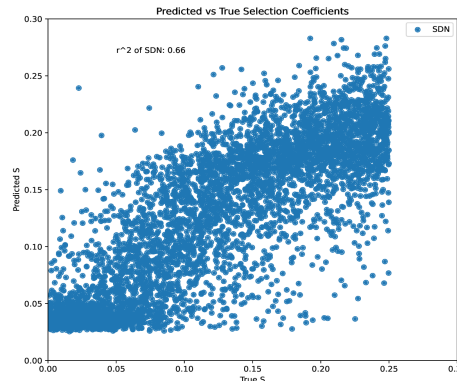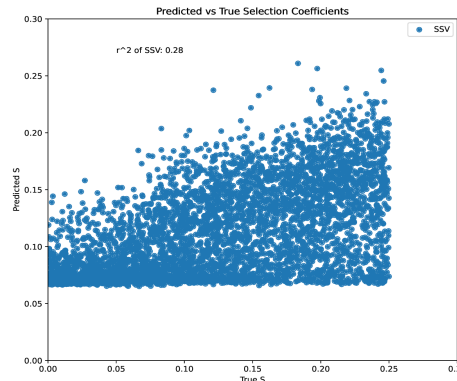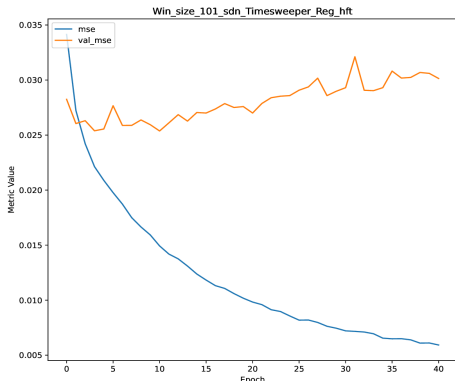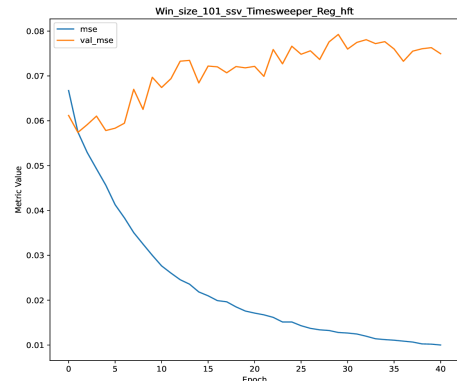

I=201

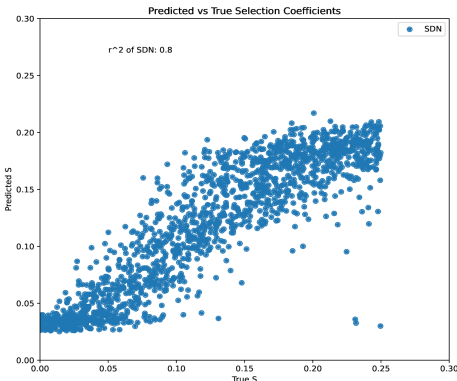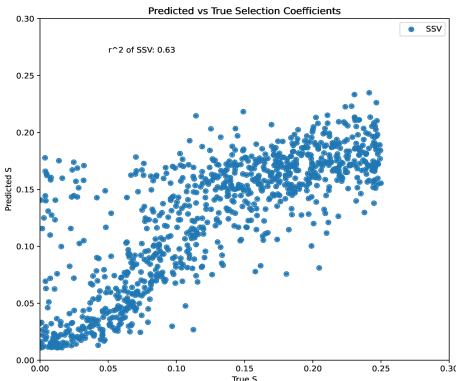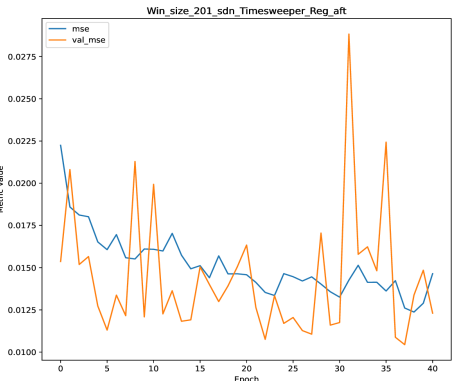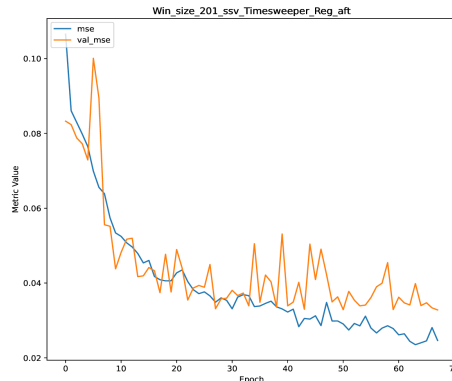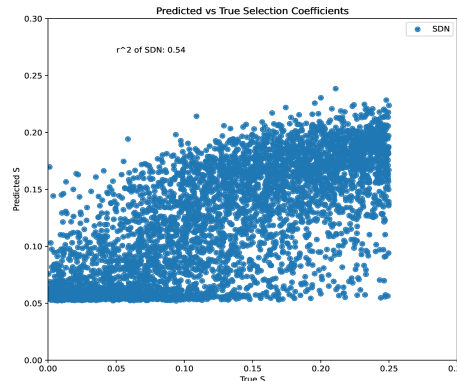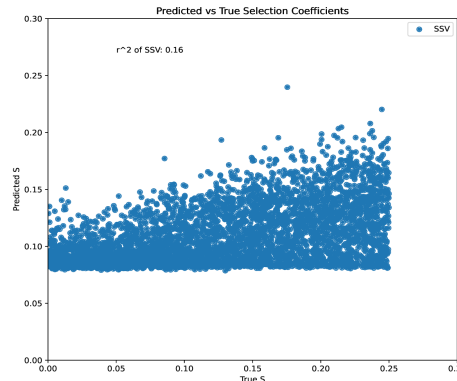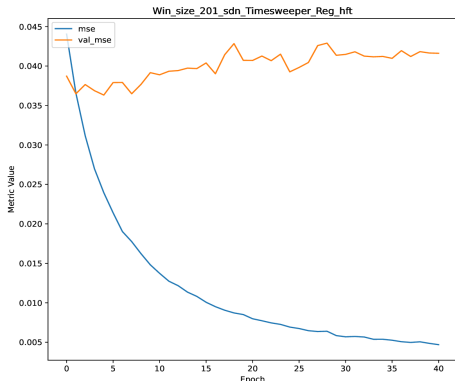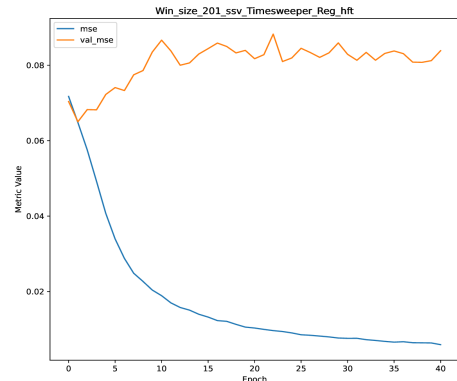

Supplement: Supplementary file 1 [file 1]

Proportion of Positive Calls

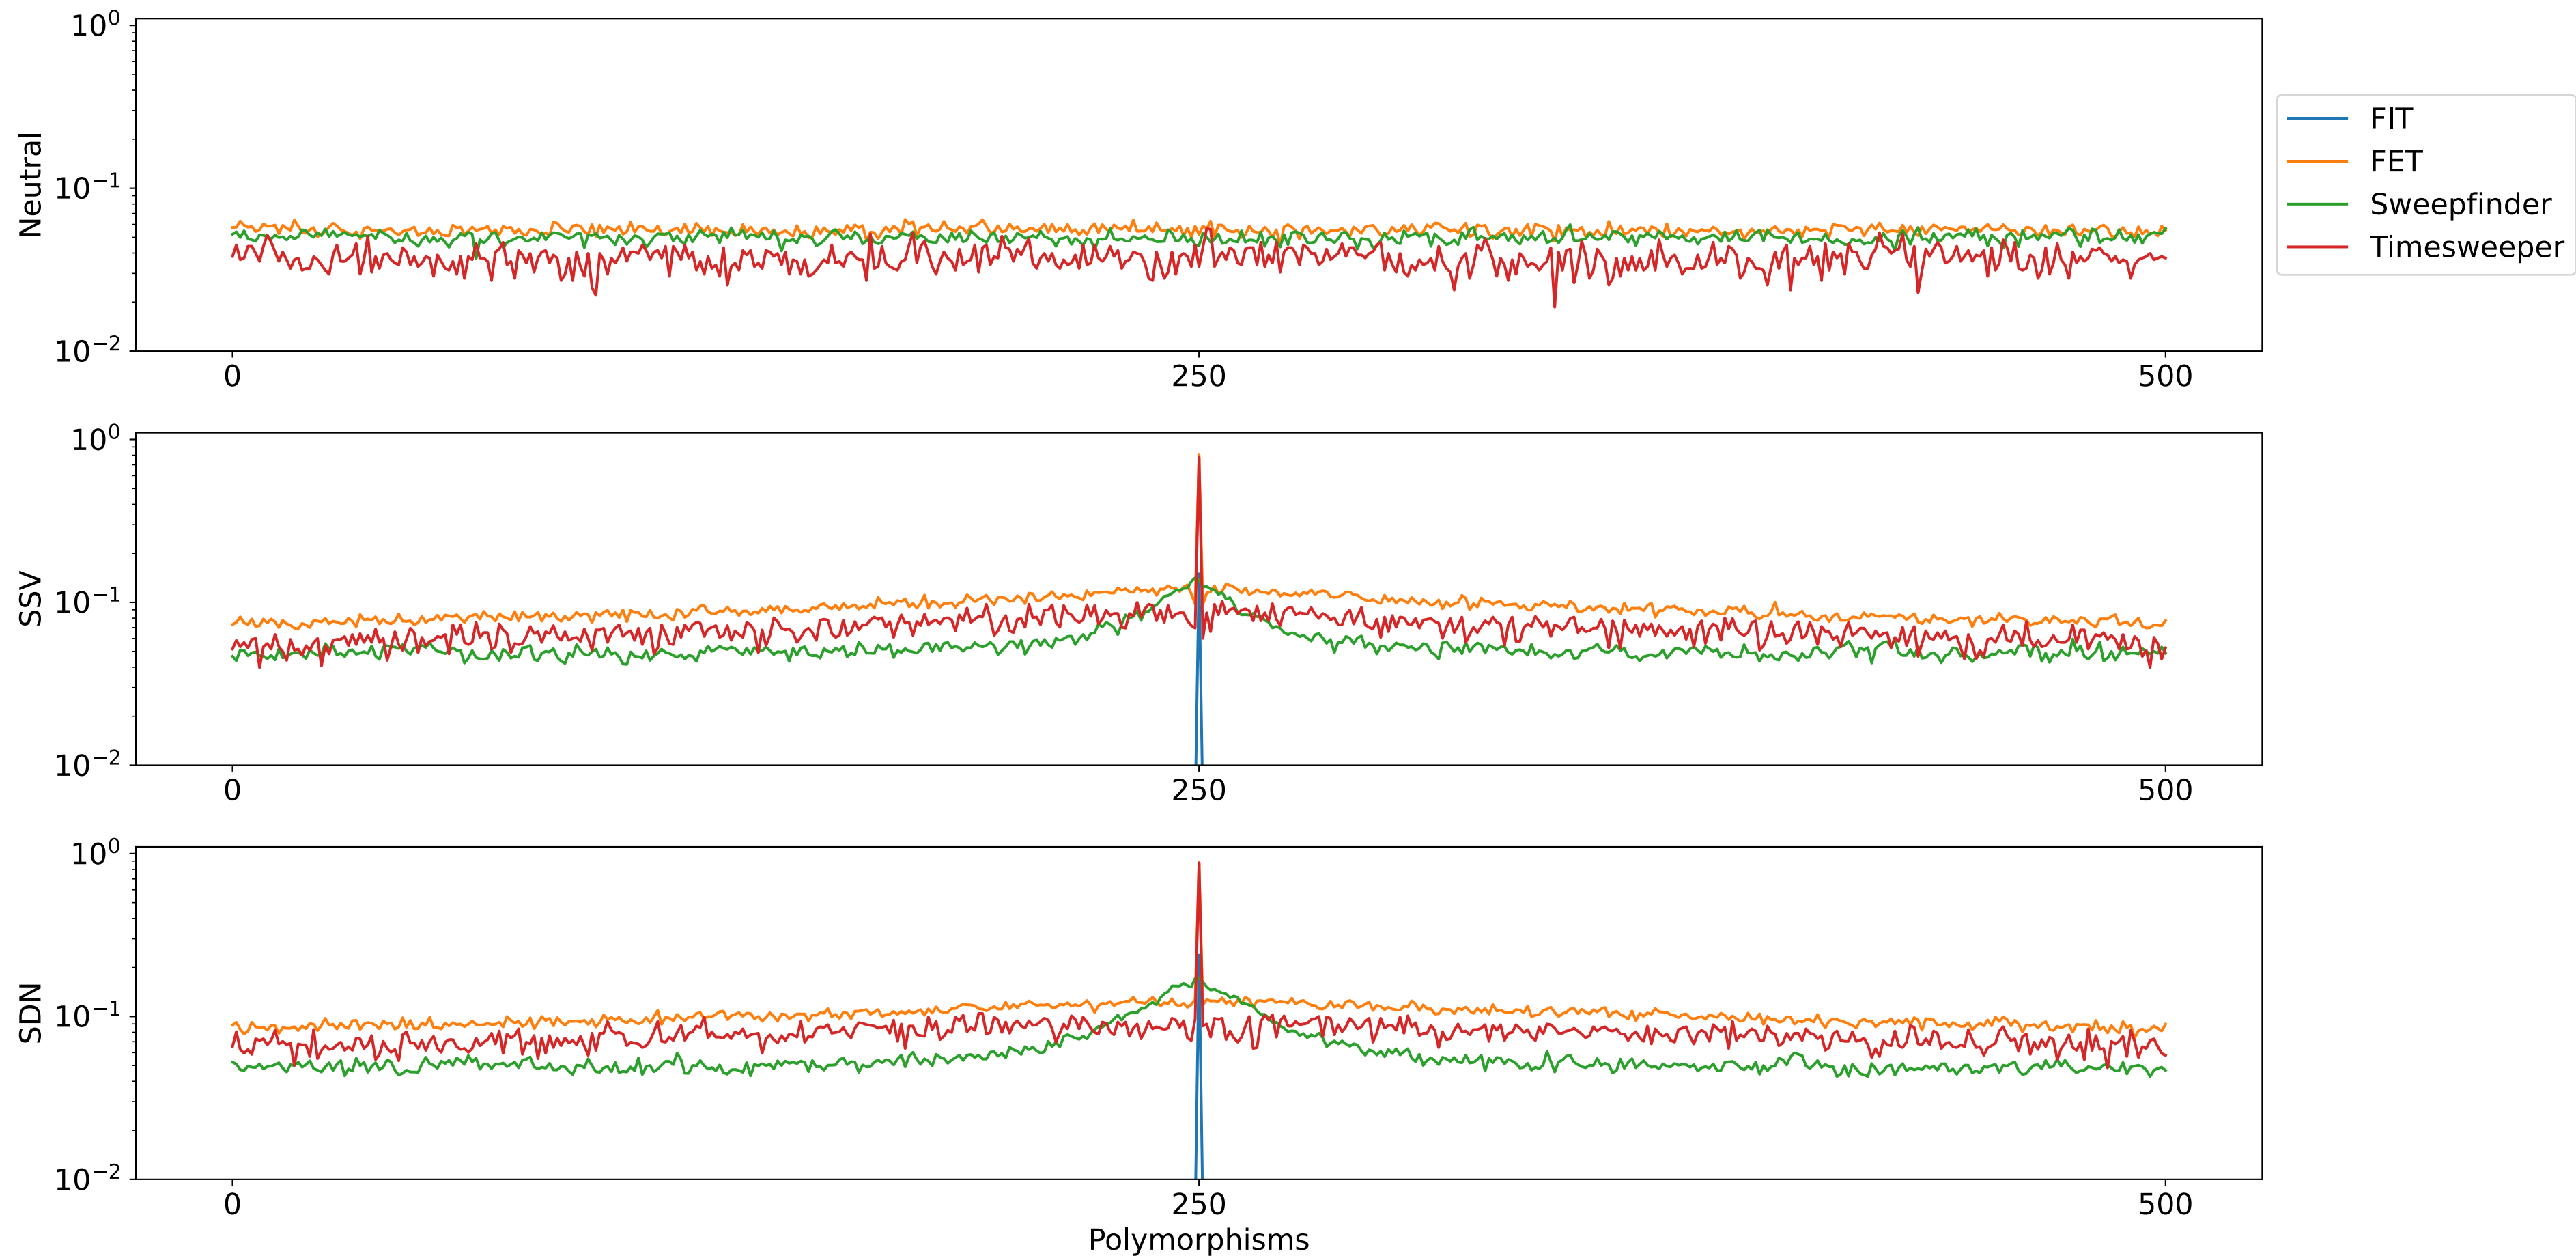

Supplement: Supplementary file 3 [file 1]

replication comparison: 100 kb windows

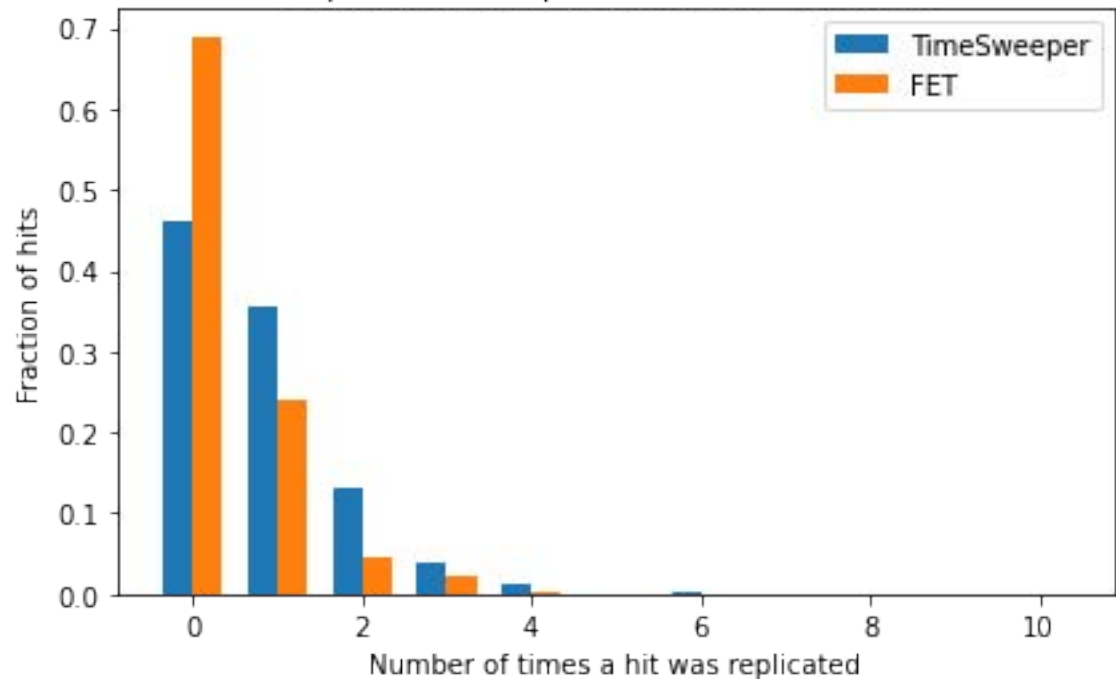

Supplement: Supplementary file 4 [file 1]

# Saliency Maps

A.

AFT

Neutral

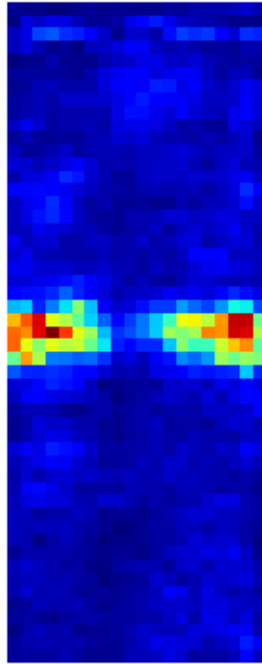

SSV

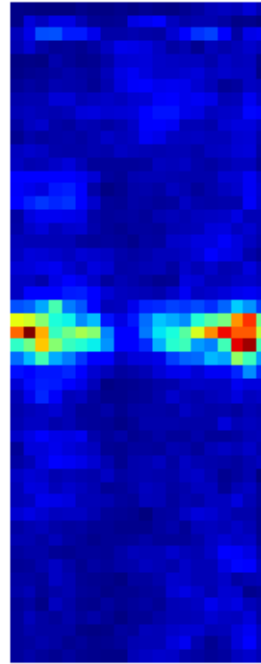

SDN

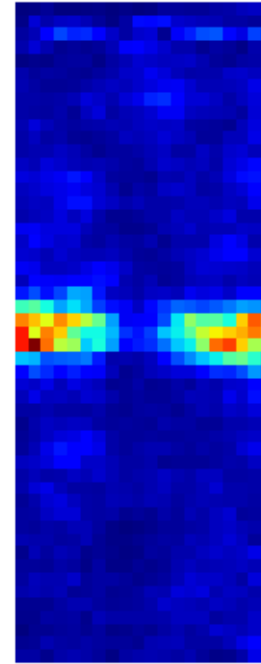

B.

HFT

Neutral

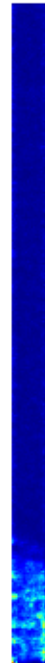

SSV

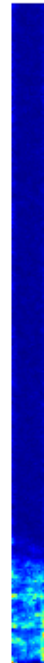

SDN

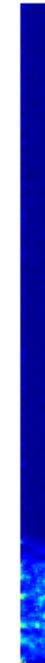

Supplement: Supplementary file 5 [file 1]

# D. simulans AFT Model Metrics

A.

Confusion Matrix

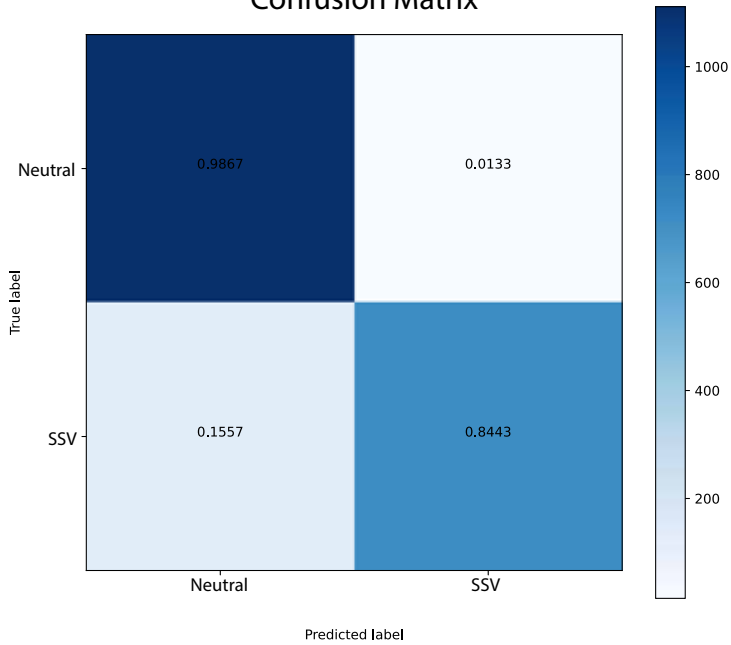

B.

ROC Curve

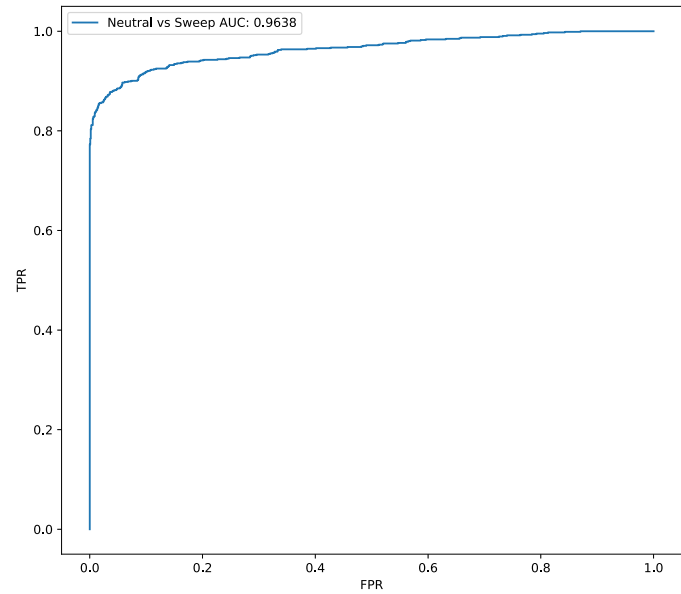

C.

Training Accuracies

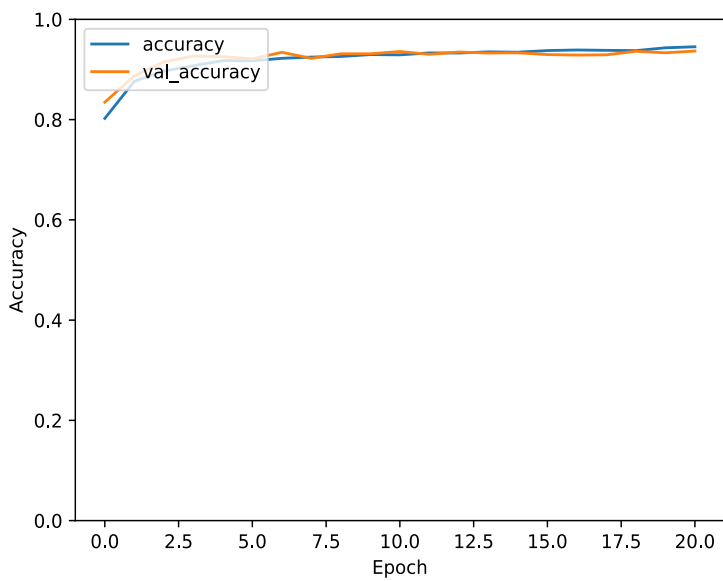

D.

PR Curve

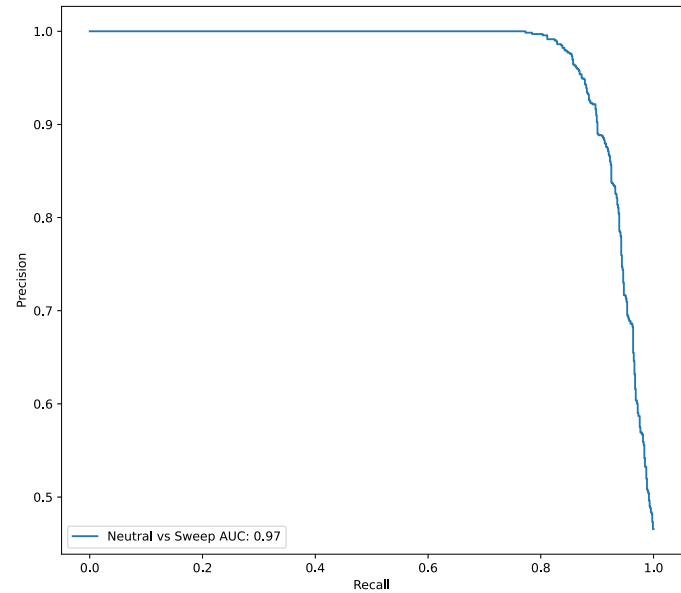

Supplement: Supplementary file 12 [file 1]

# Classification - Architectures

## AFT

## HFT

1DCNN

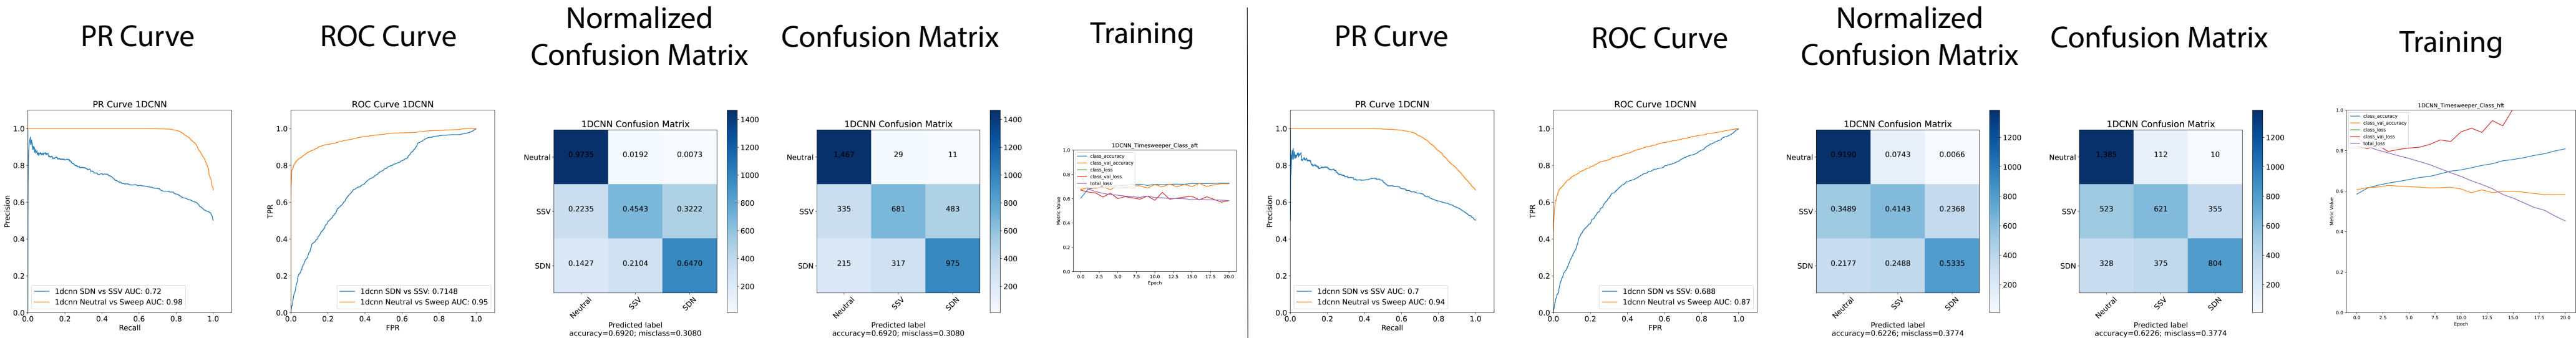

Big 1DCNN

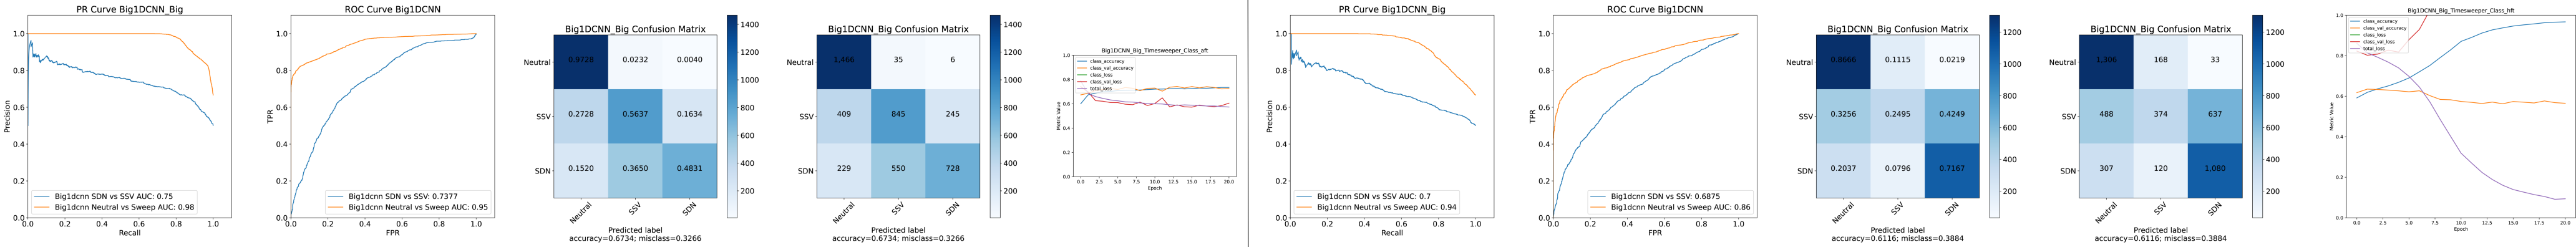

2DCNN

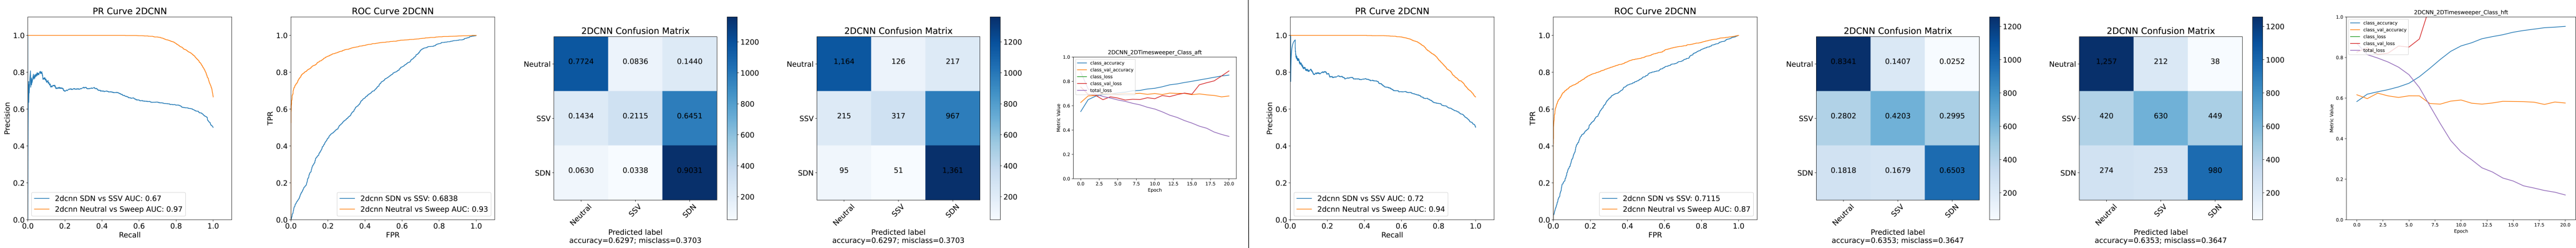

RNN

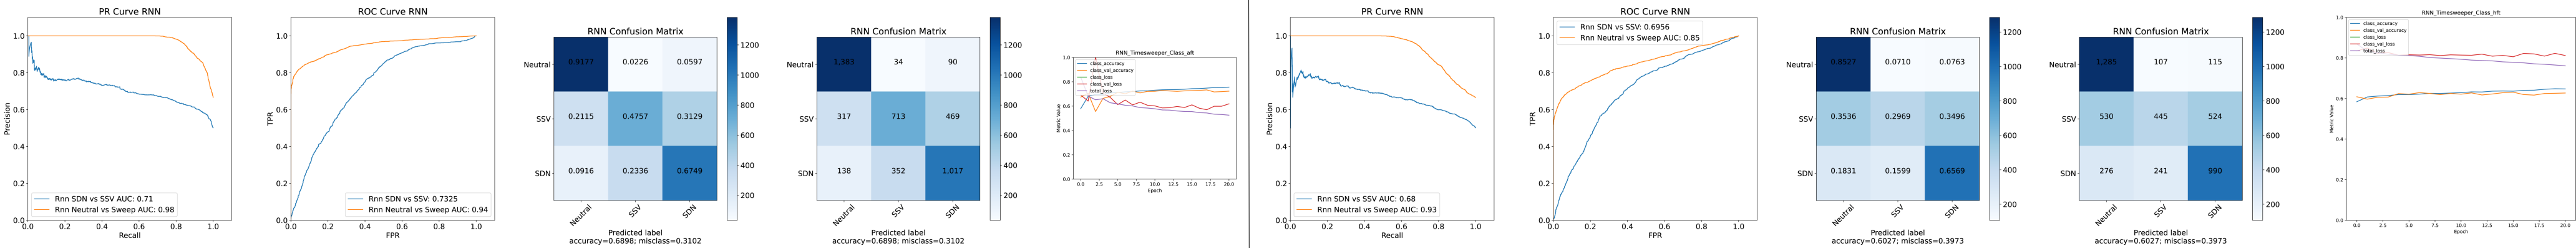

Supplement: Supplementary file 14 [file 1]

Binned Proportion of Sweep Calls Over 500kb Region

Proportion of Sweep Calls

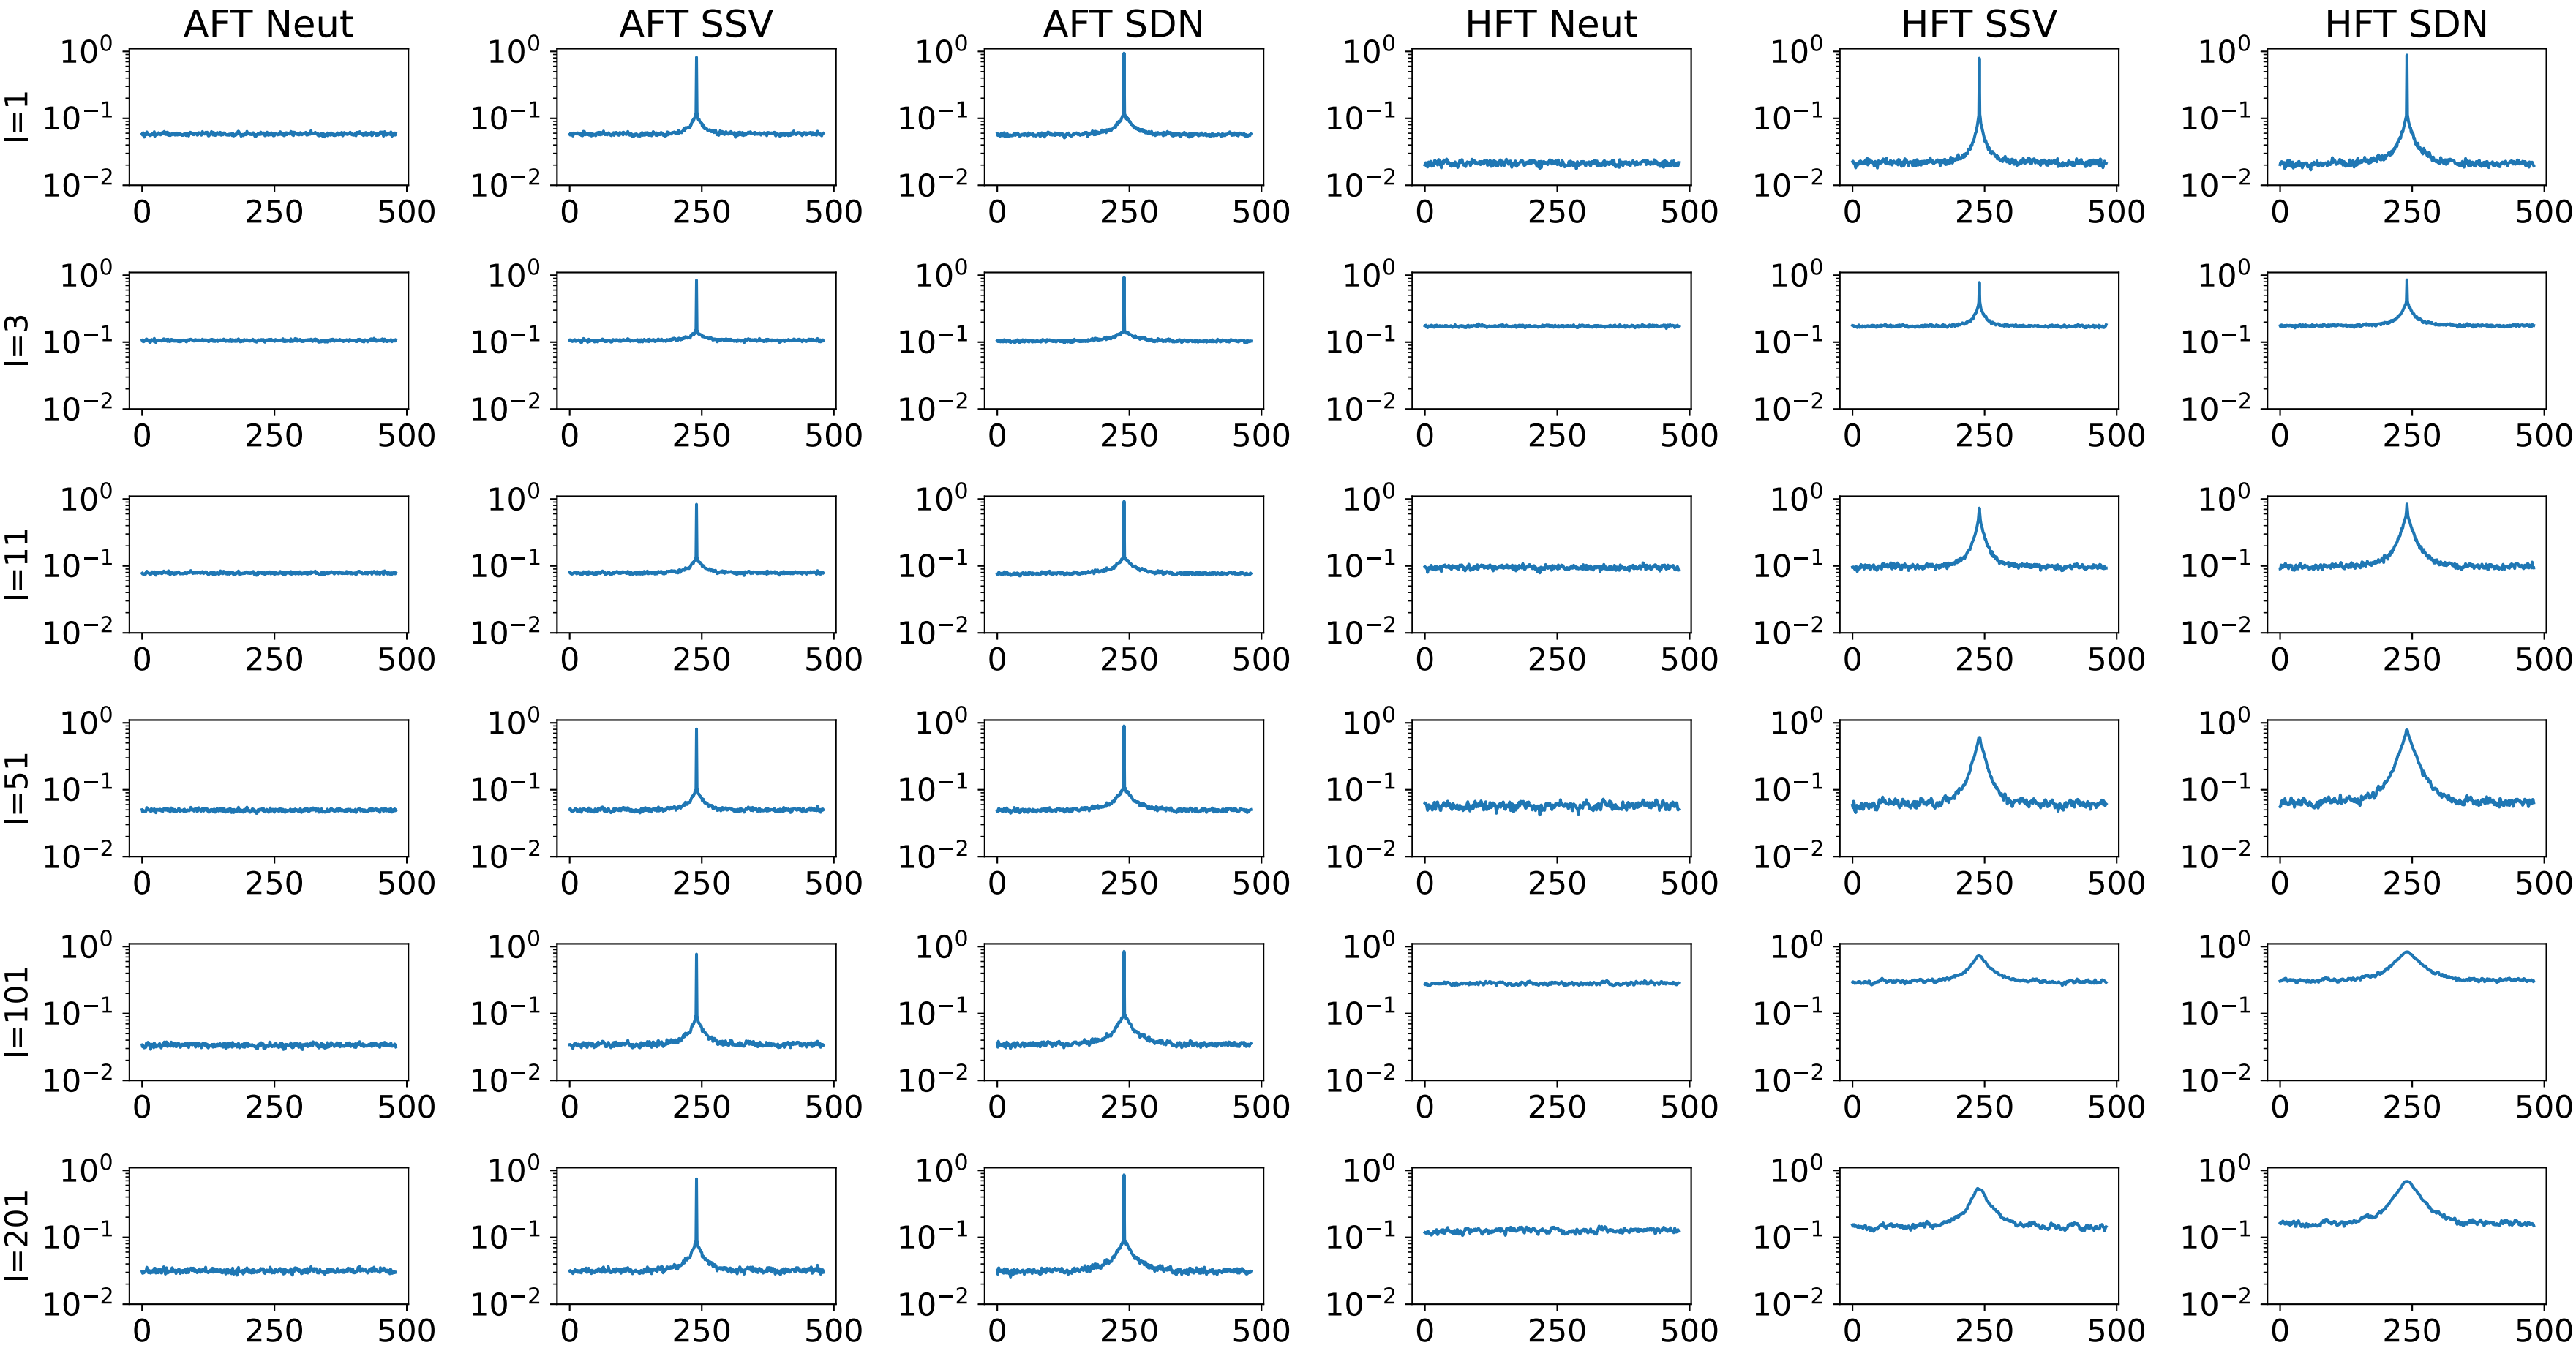

Bins

Supplement: Supplementary file 25 [file 1]

# Misspecification Classification ROC and PR Curves

Neutral vs Sweep

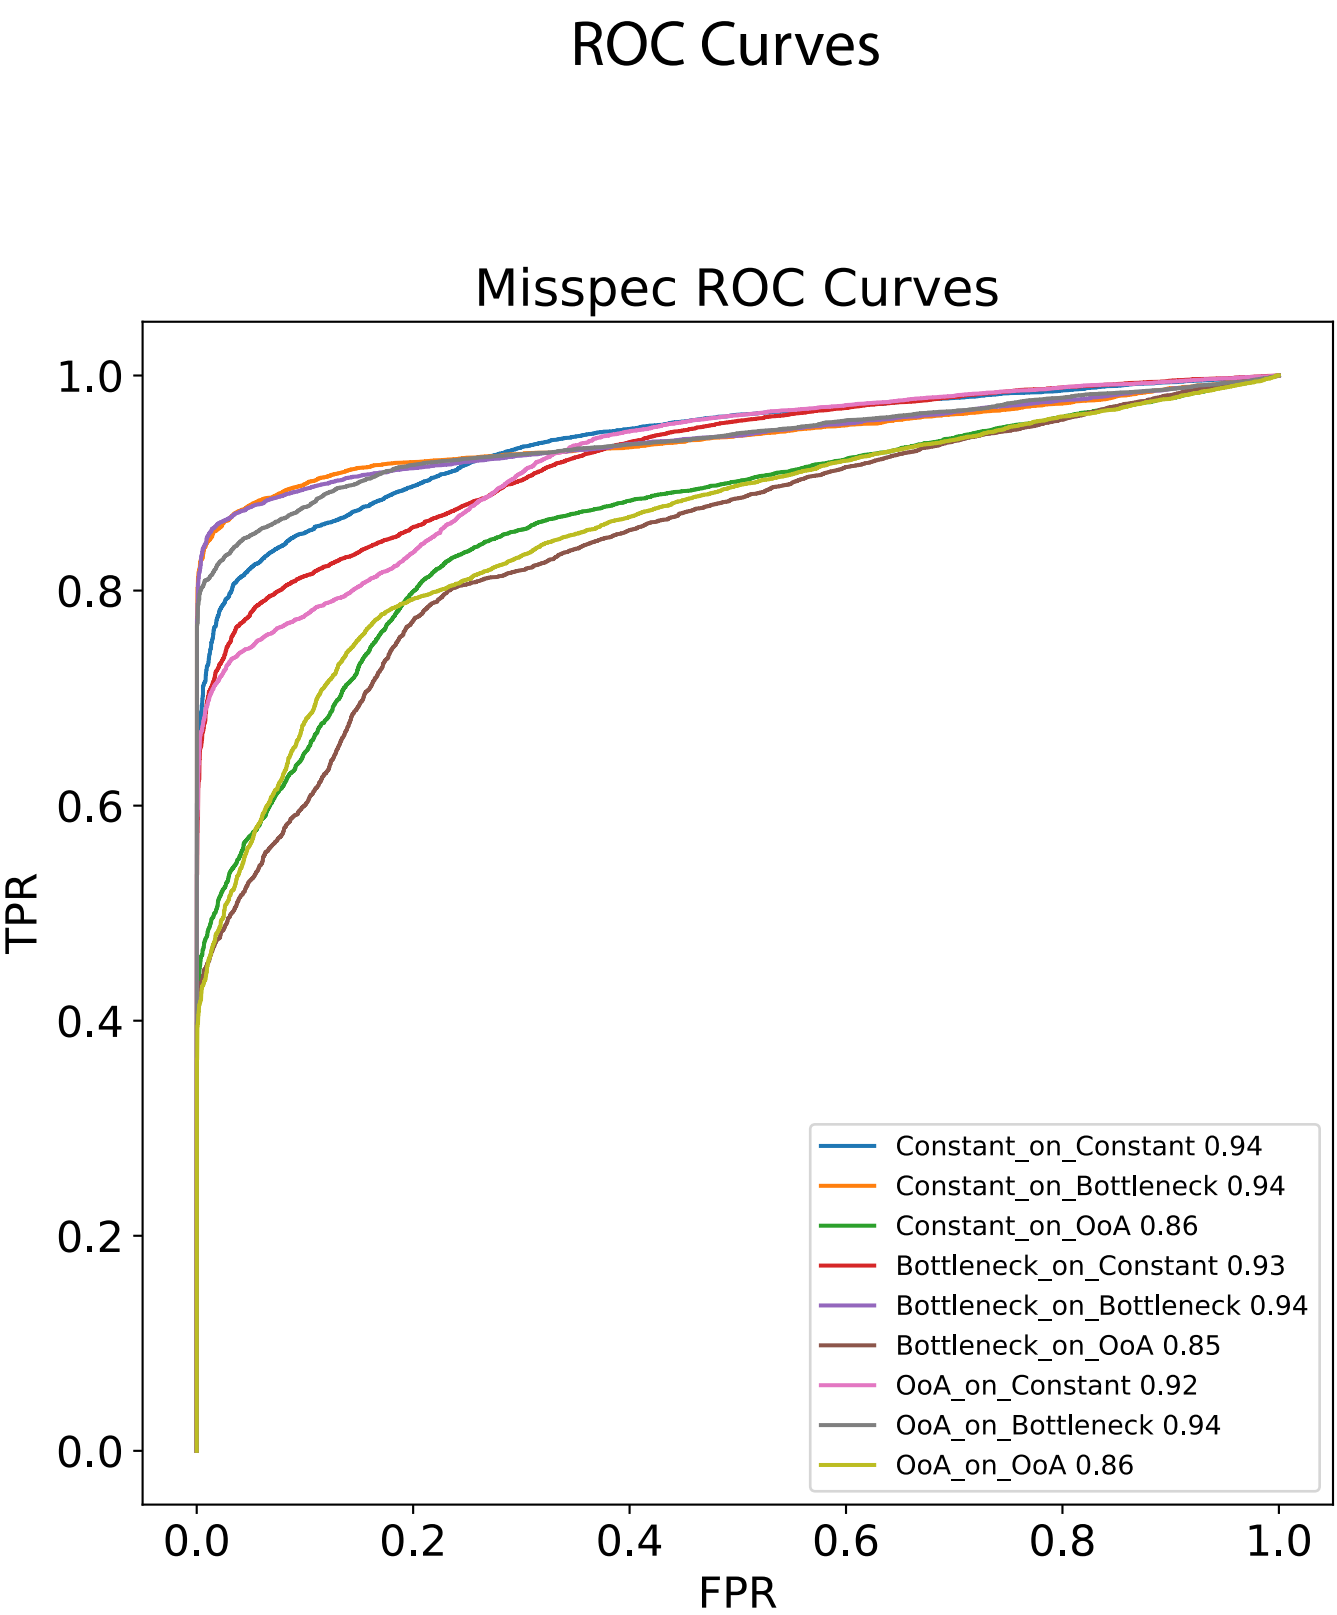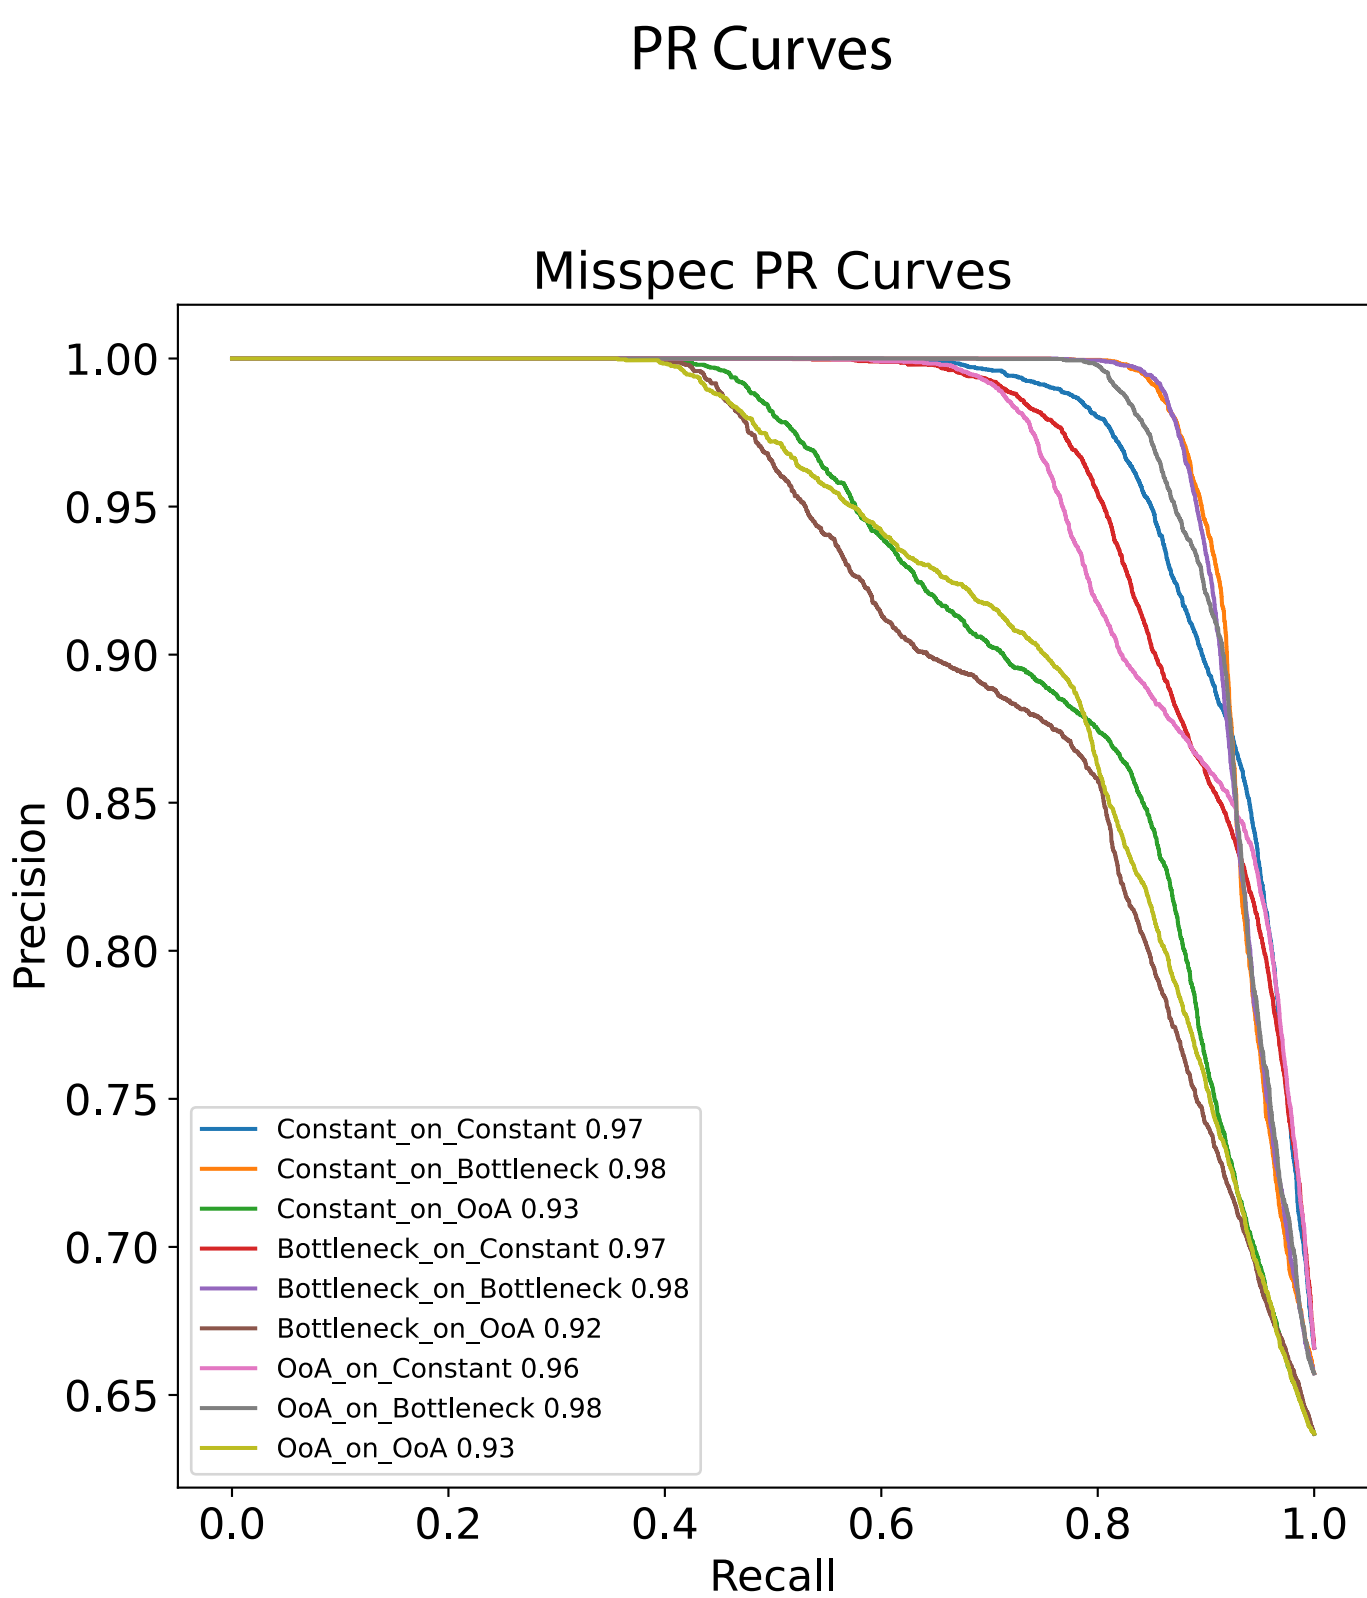

SDN vs SSV

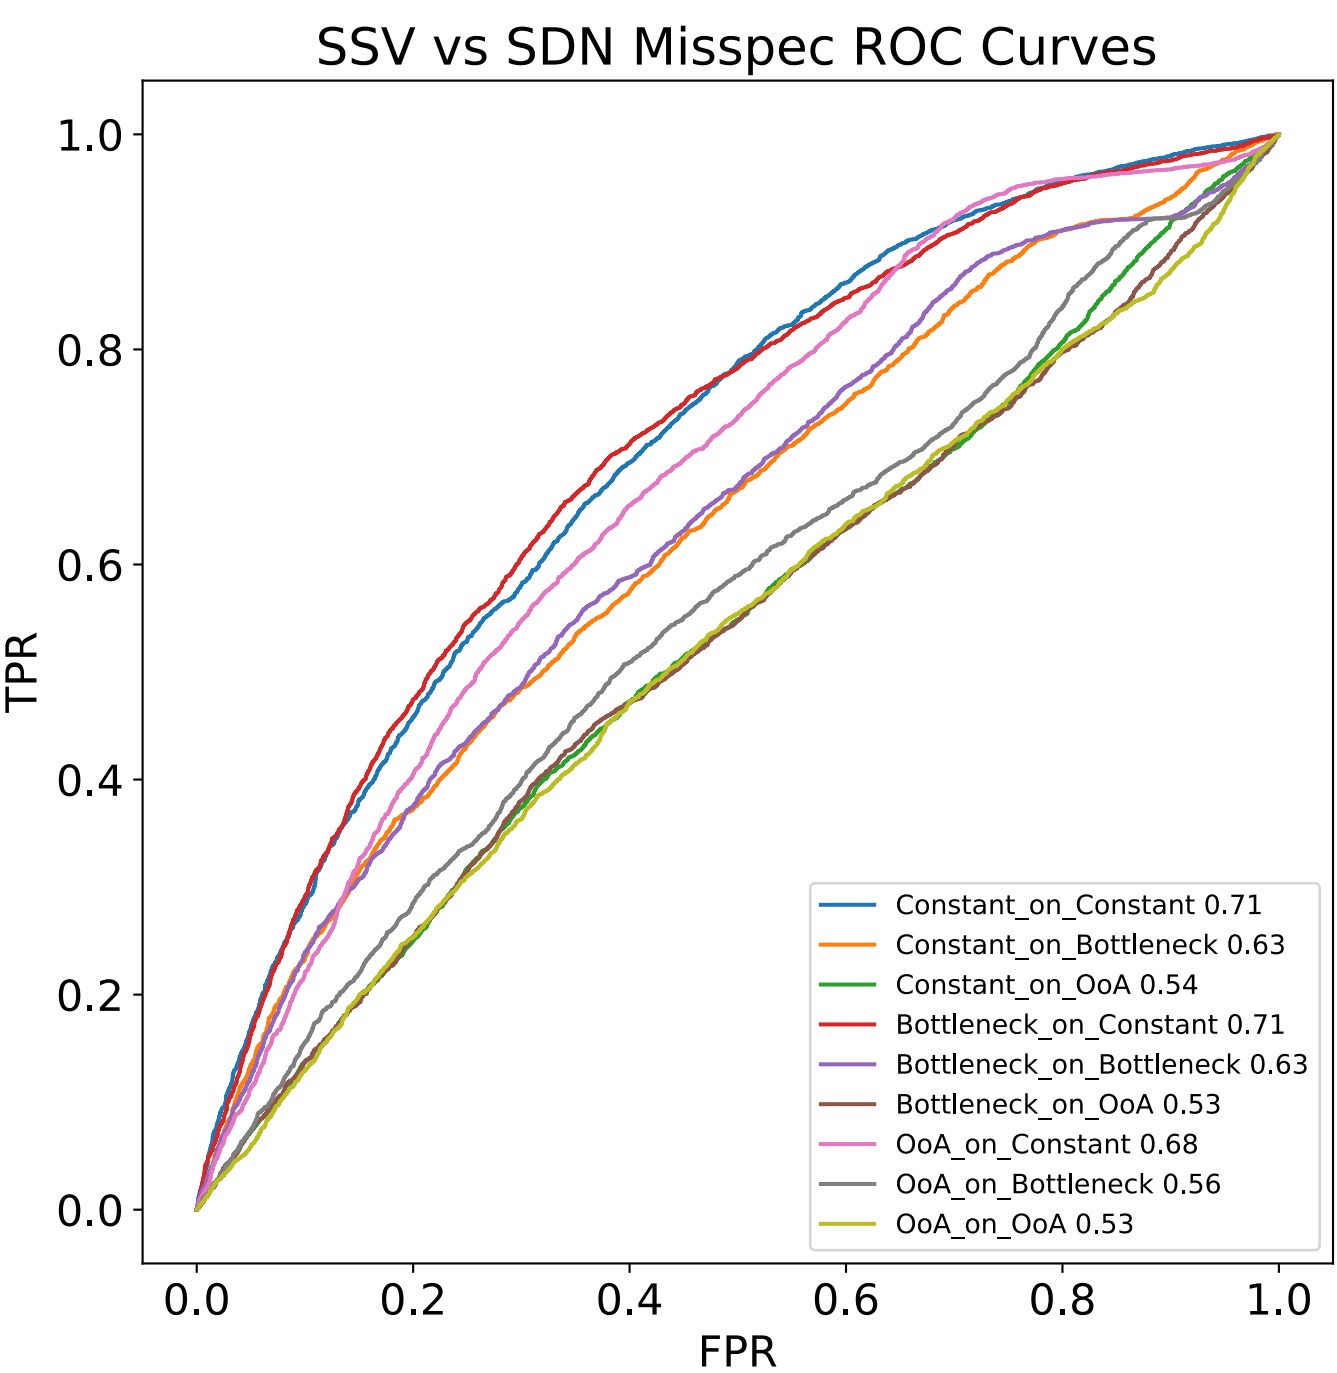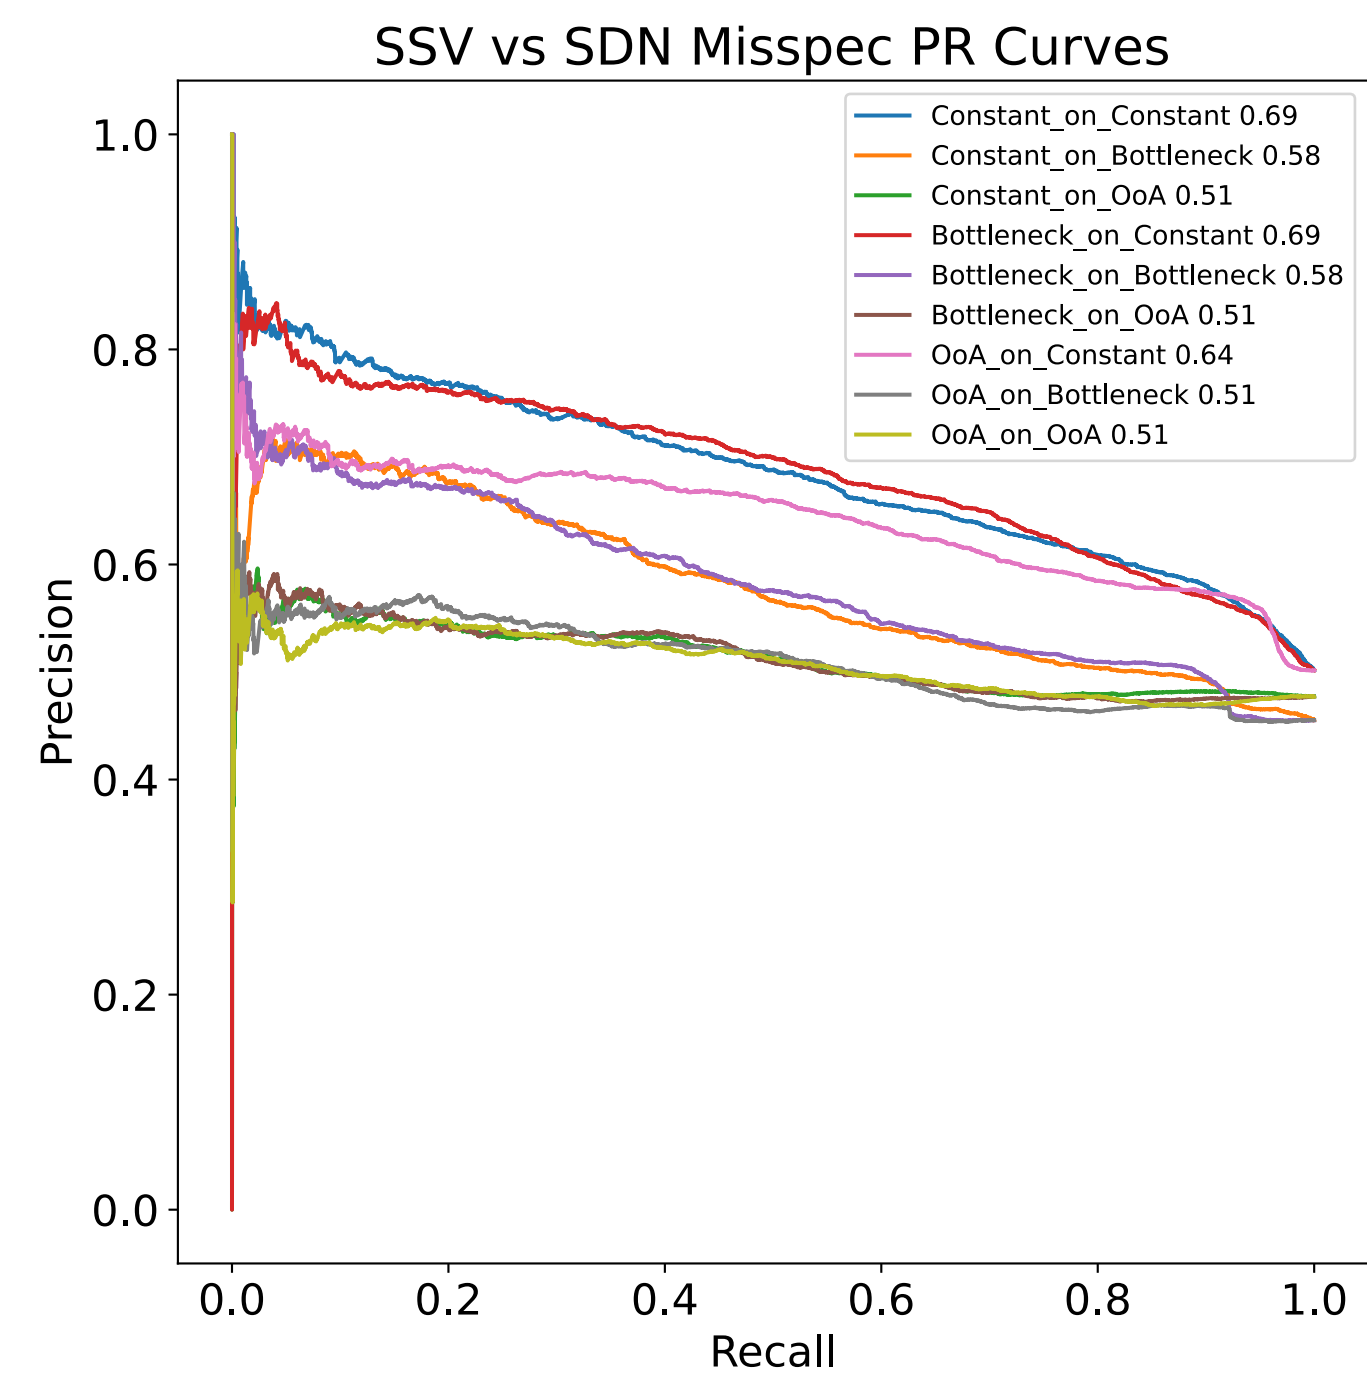

FET

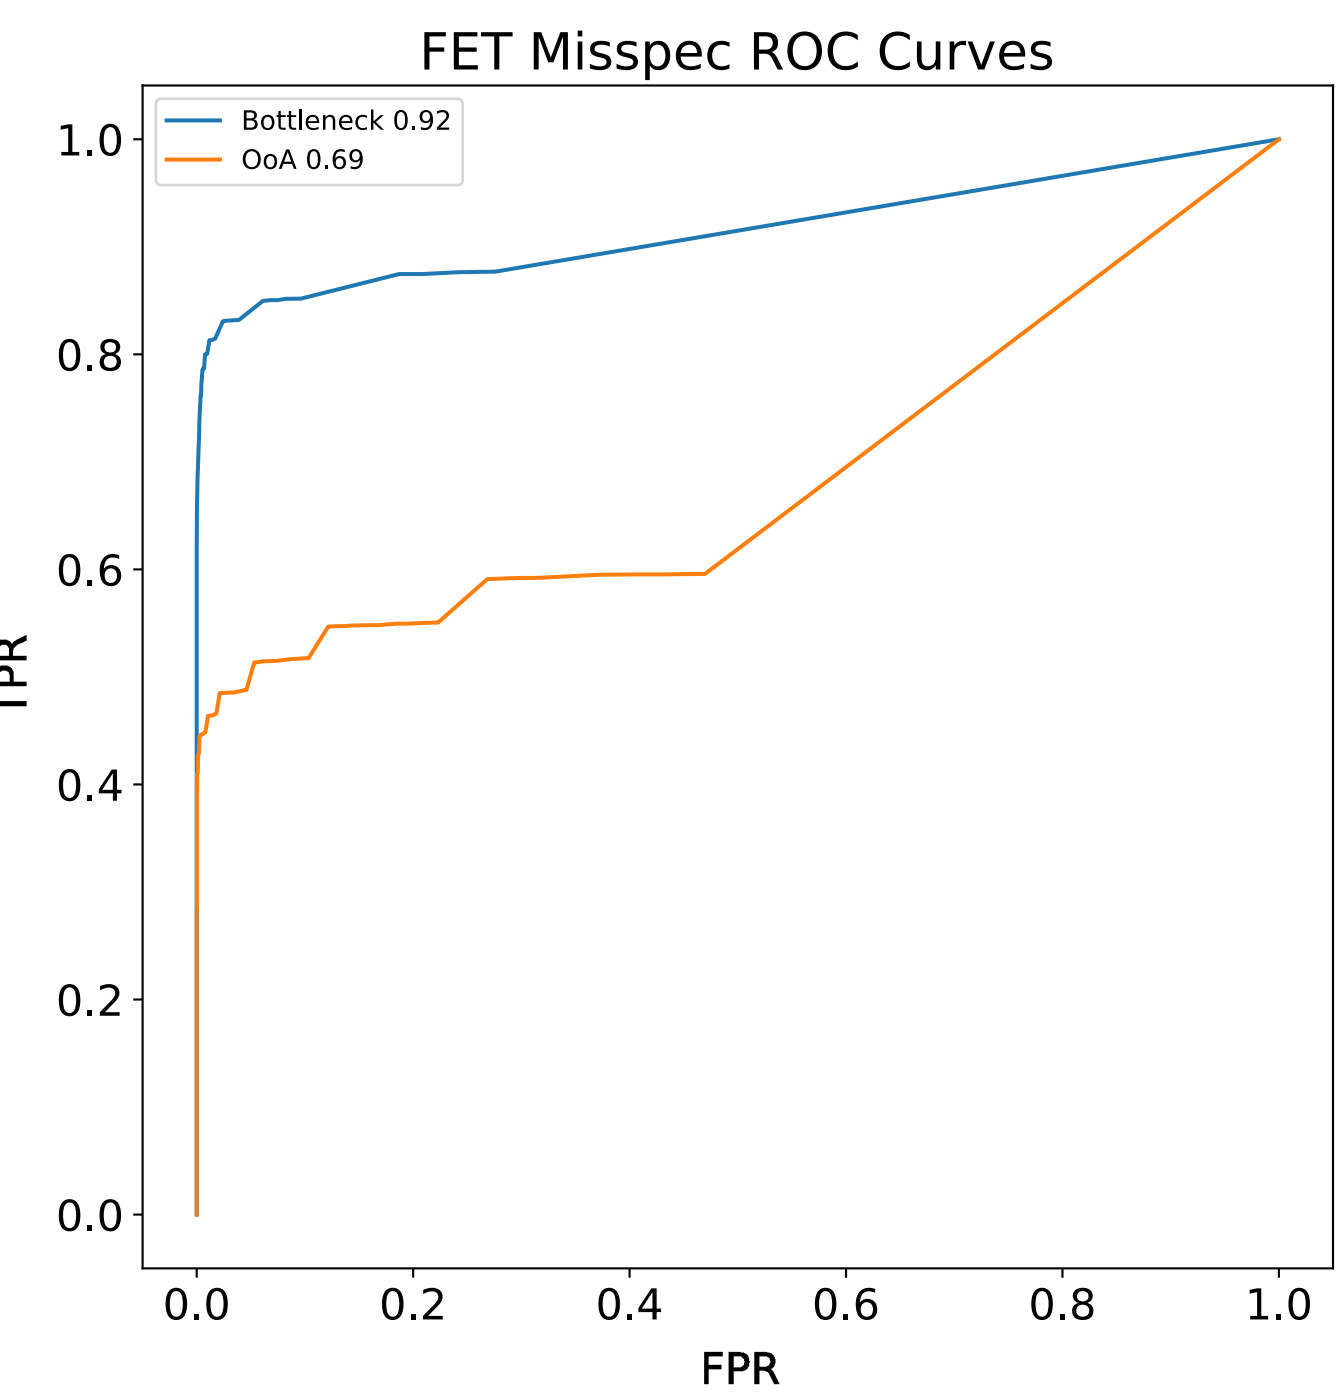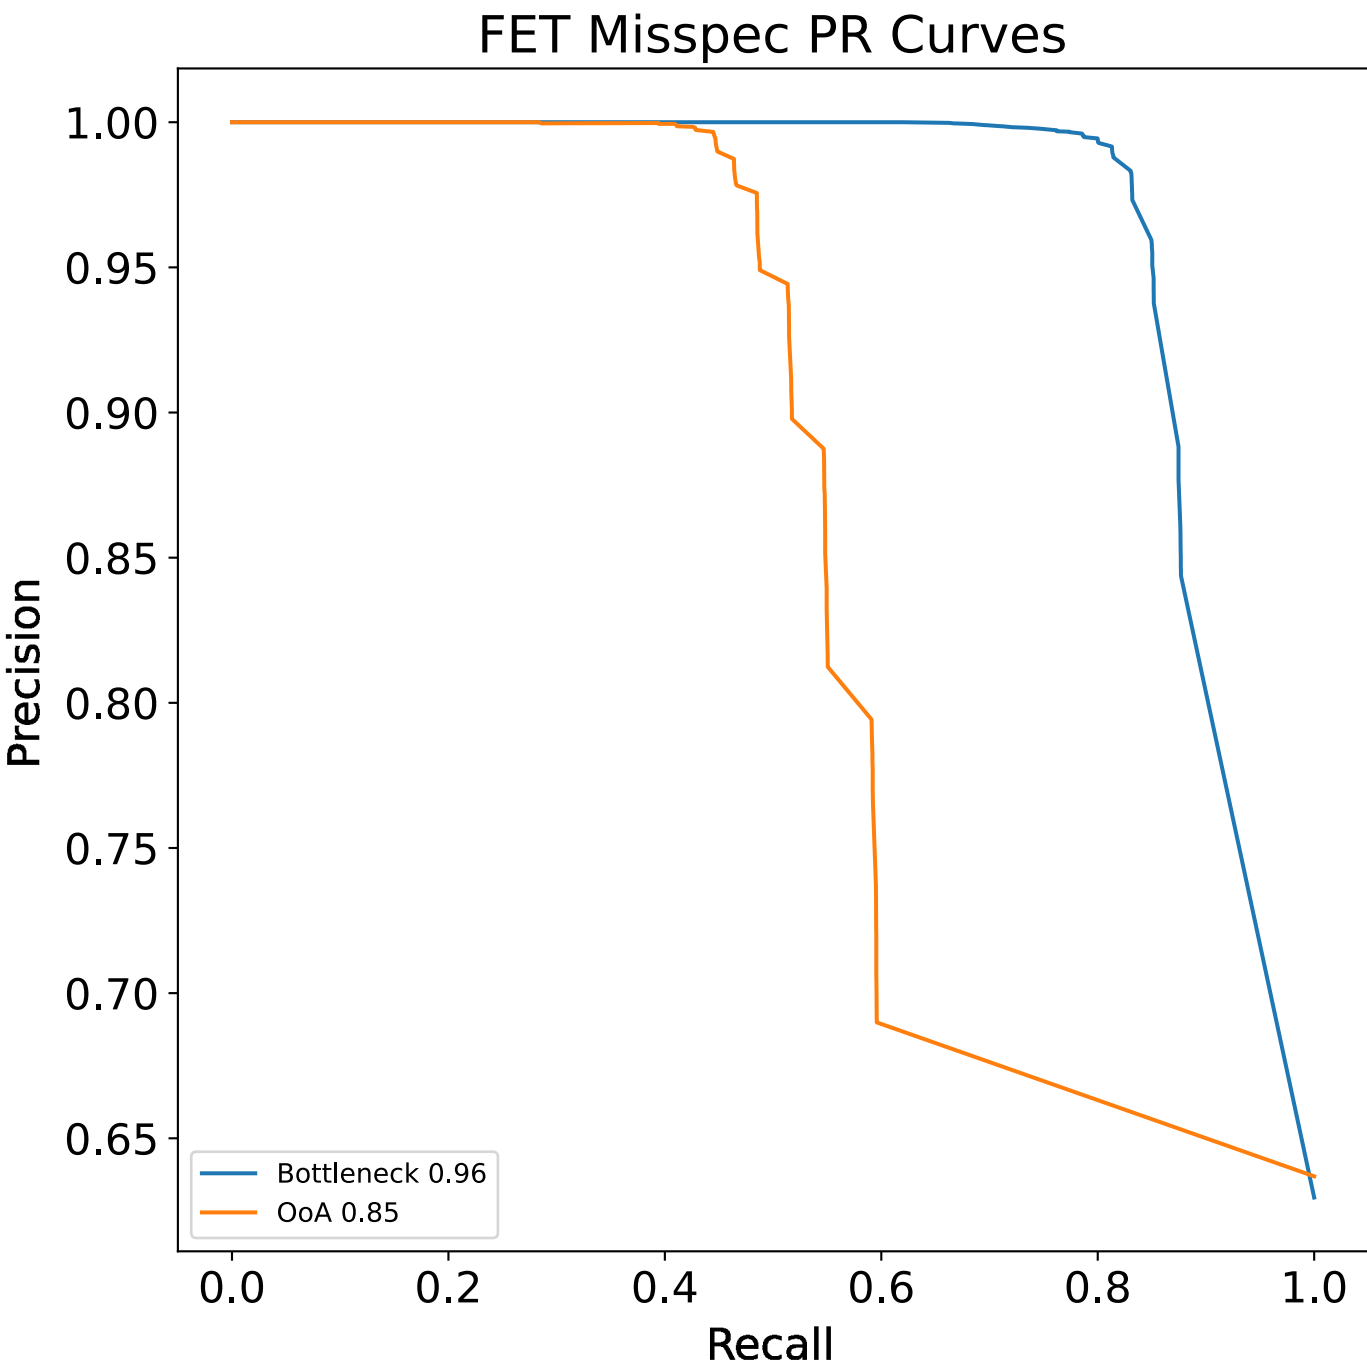

Supplement: Supplementary file 28 [file 1]

Classification - Selection Coefficient

AFT

HFT

s=0.005

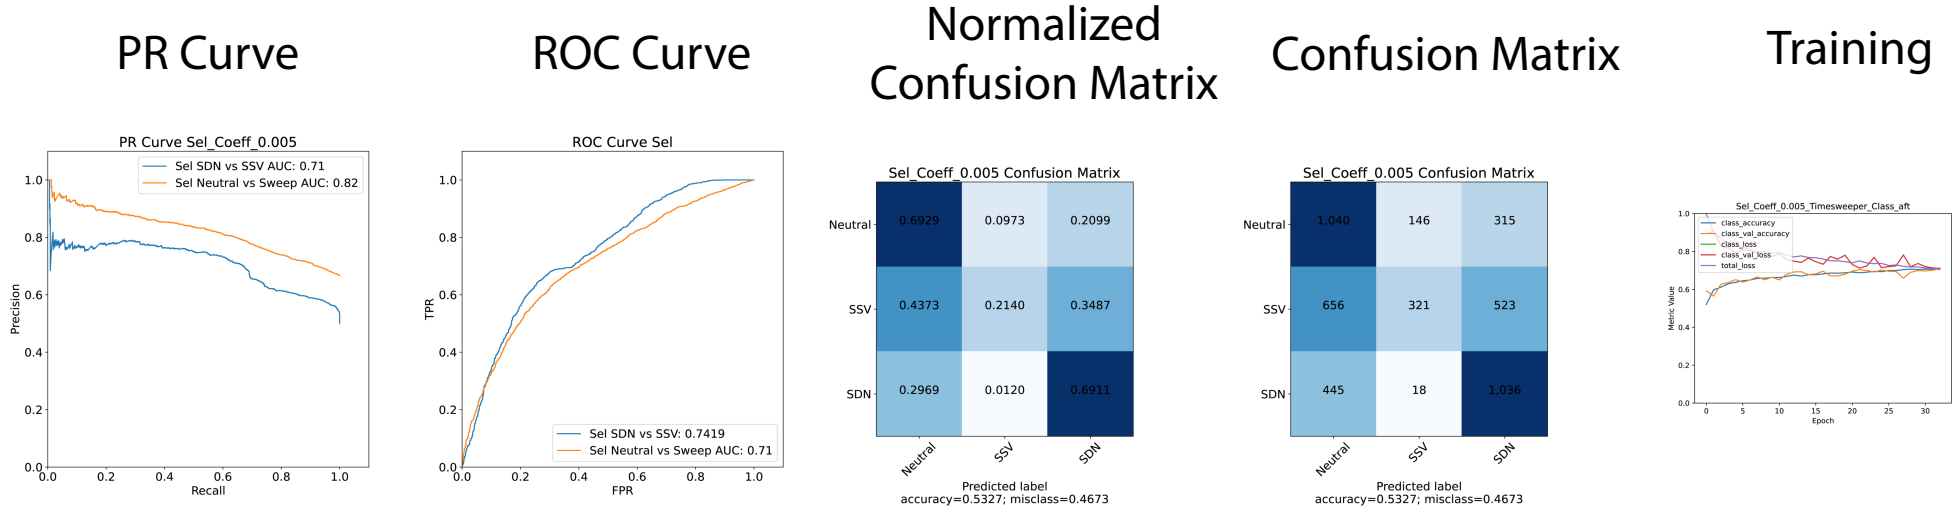

s=0.01

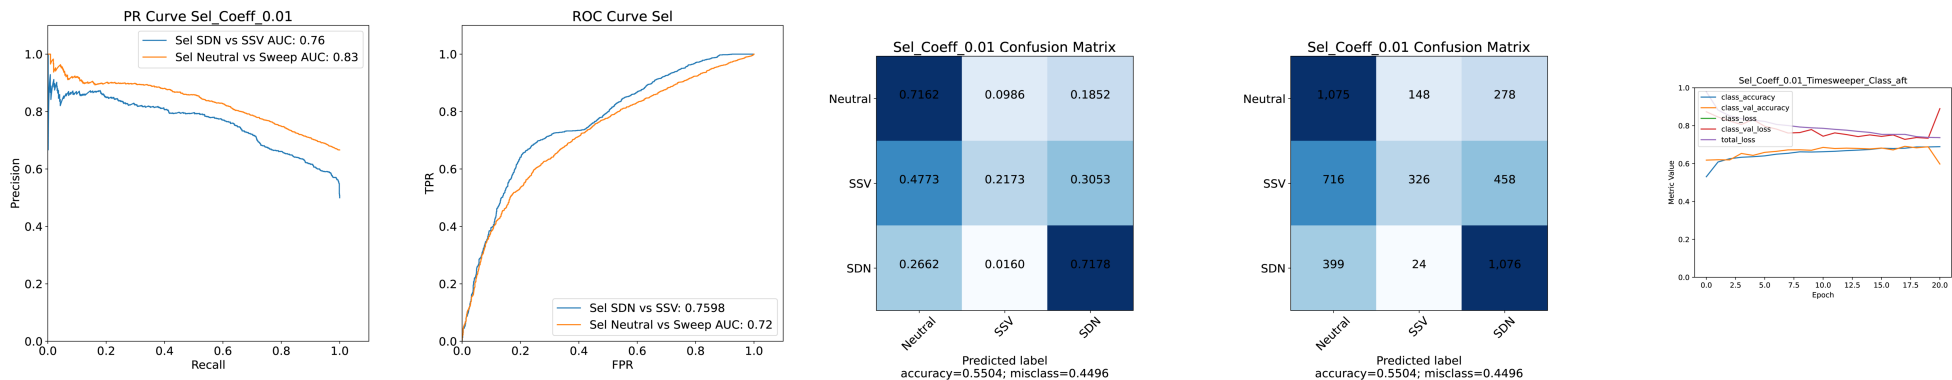

s=0.05

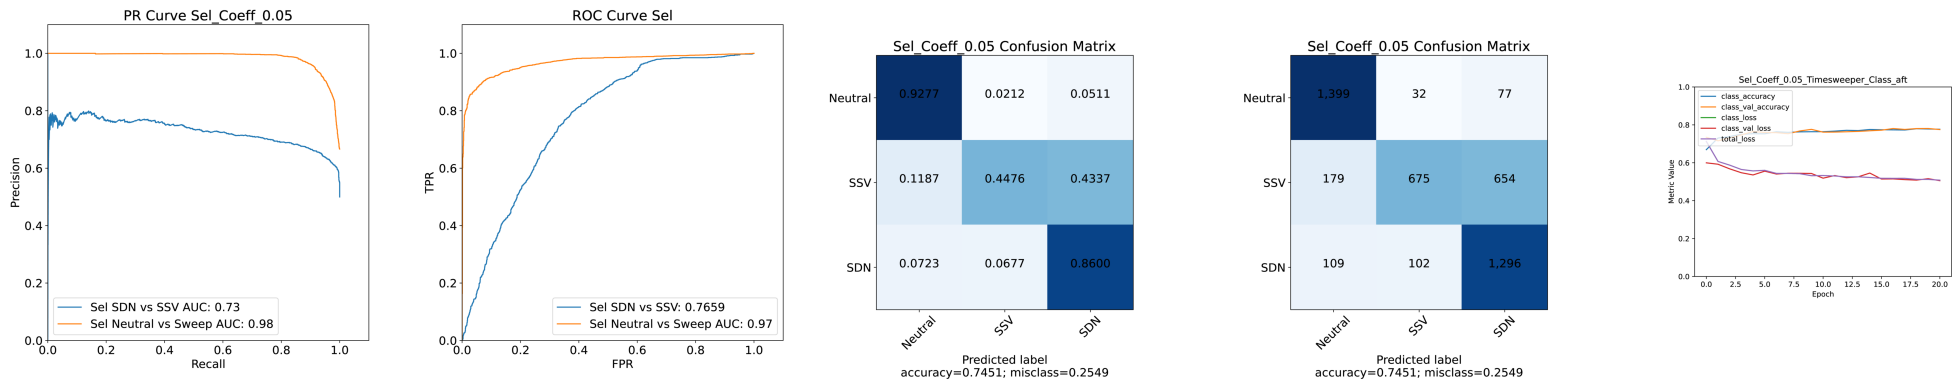

s=0.10

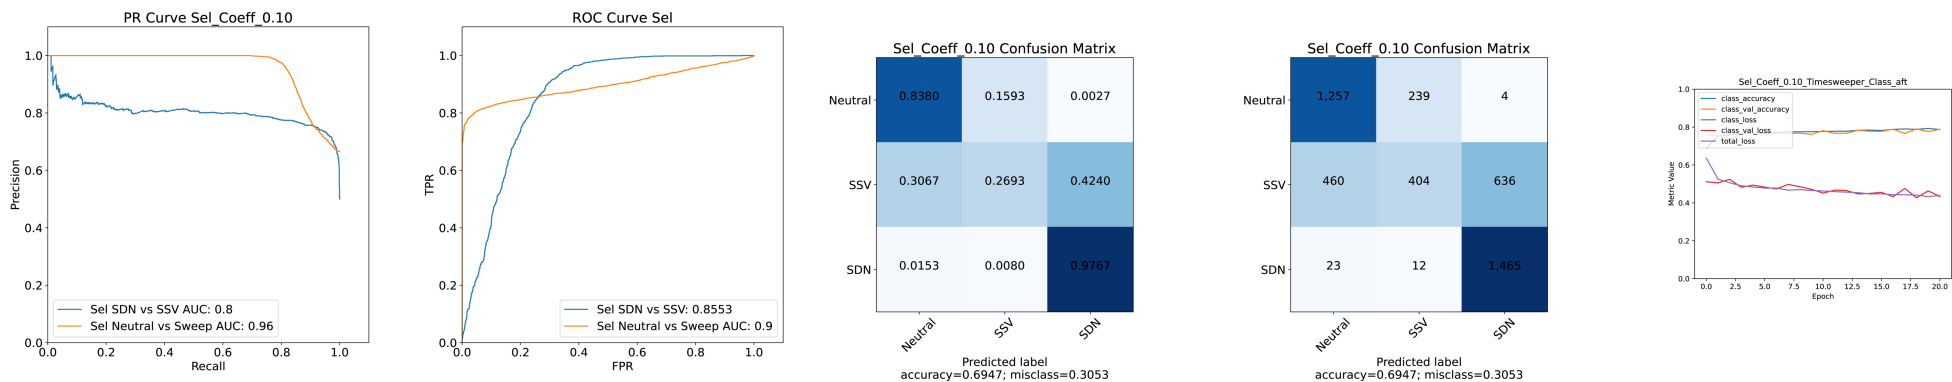

s=0.50

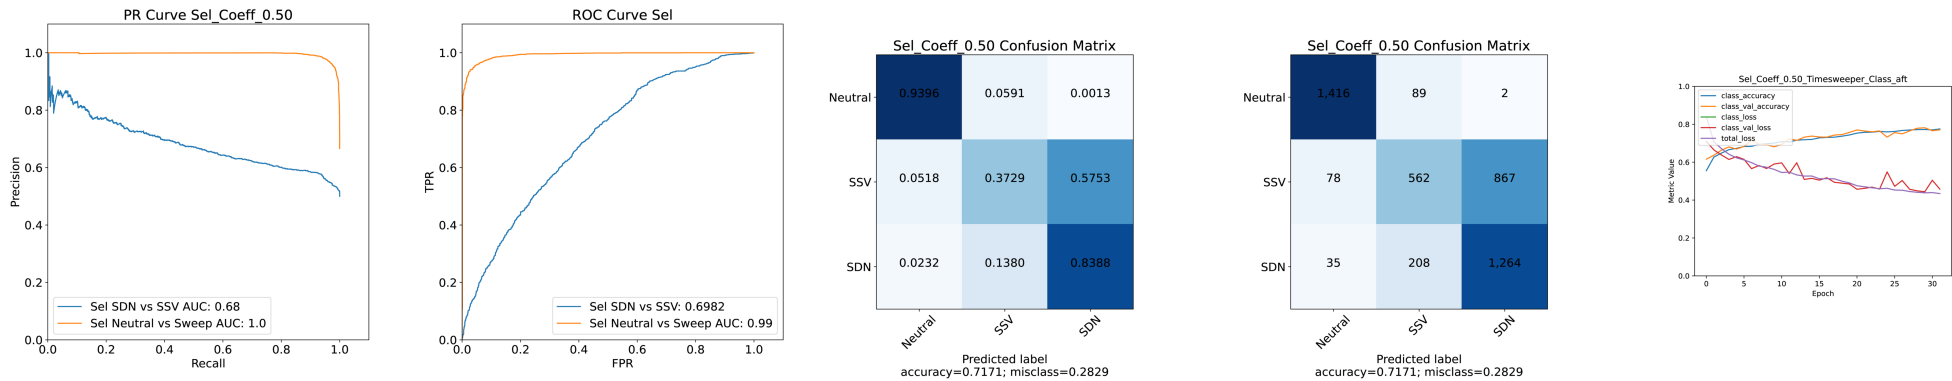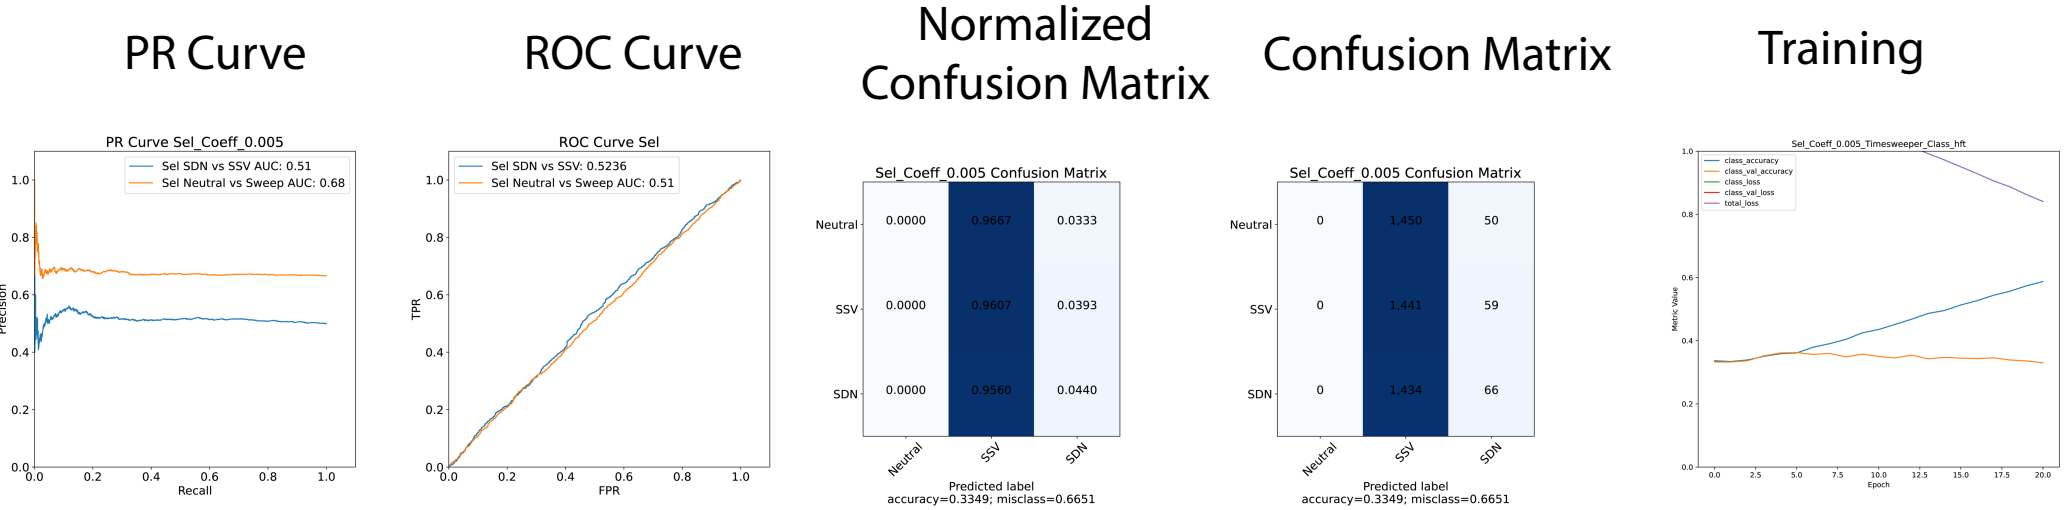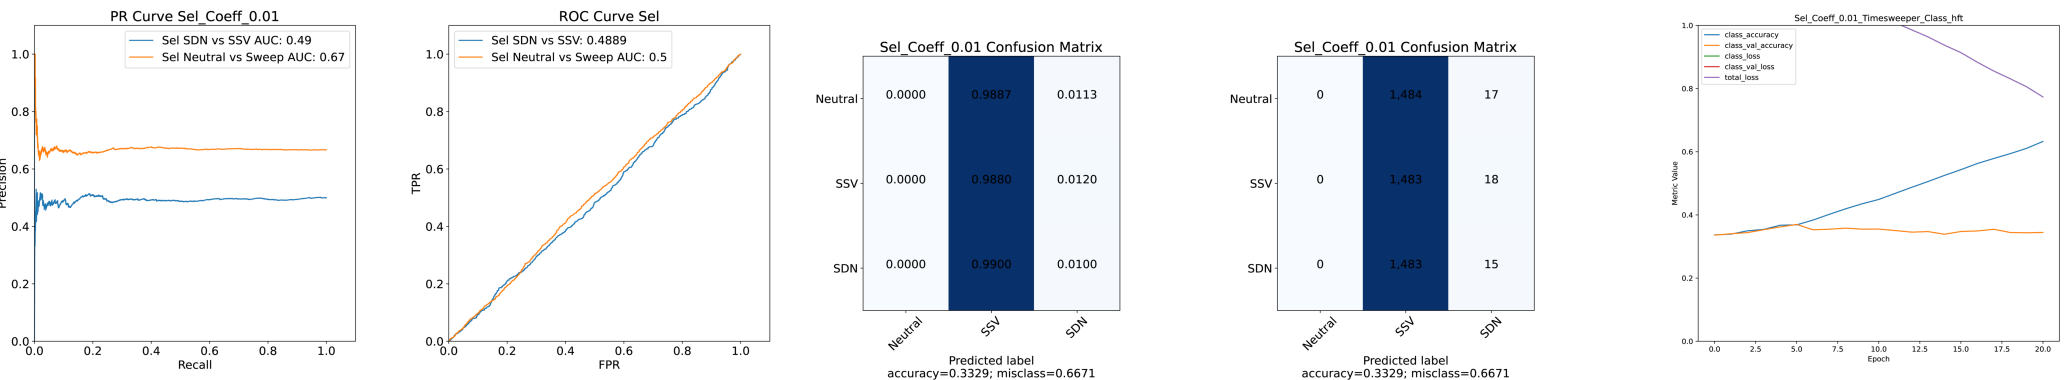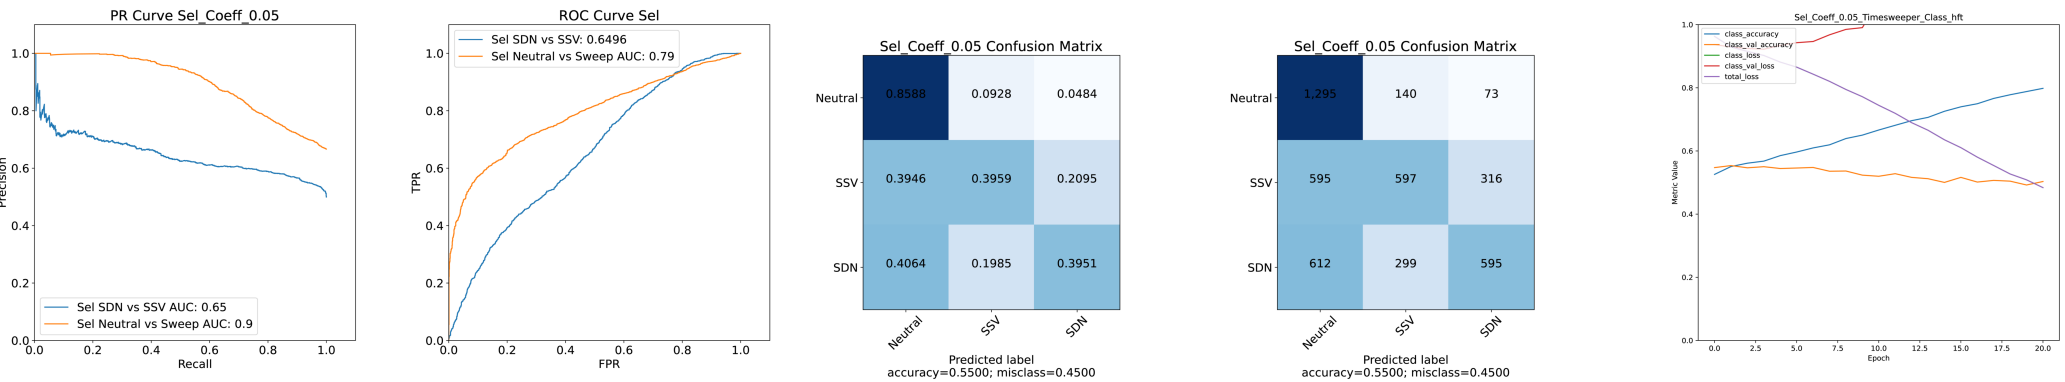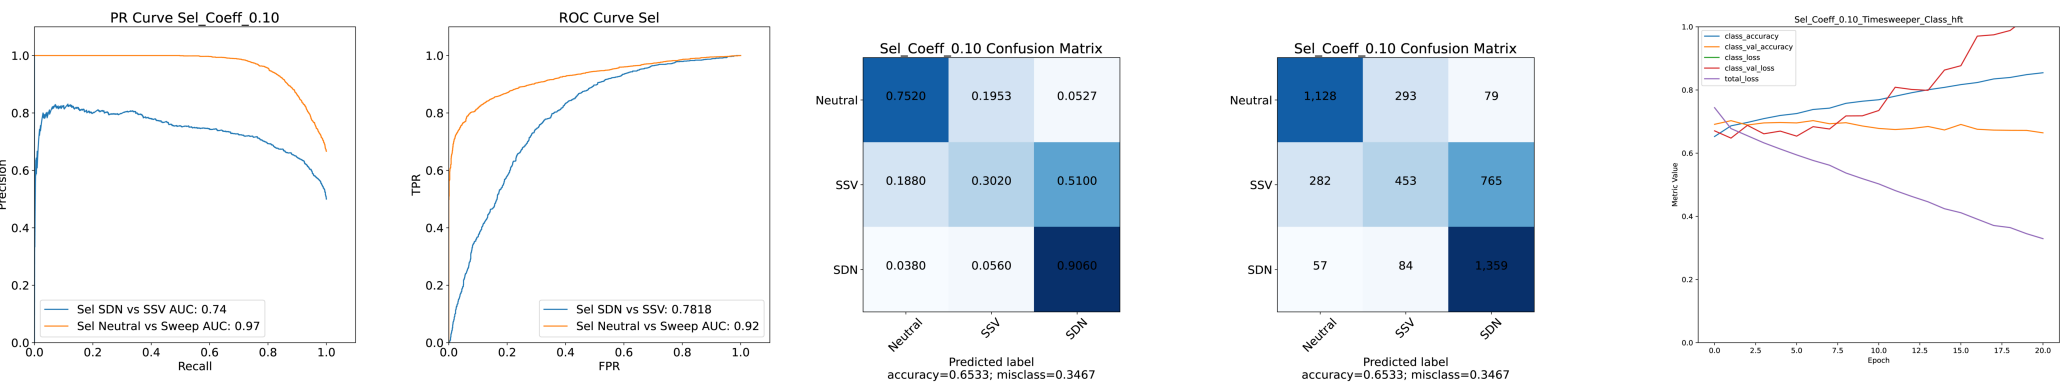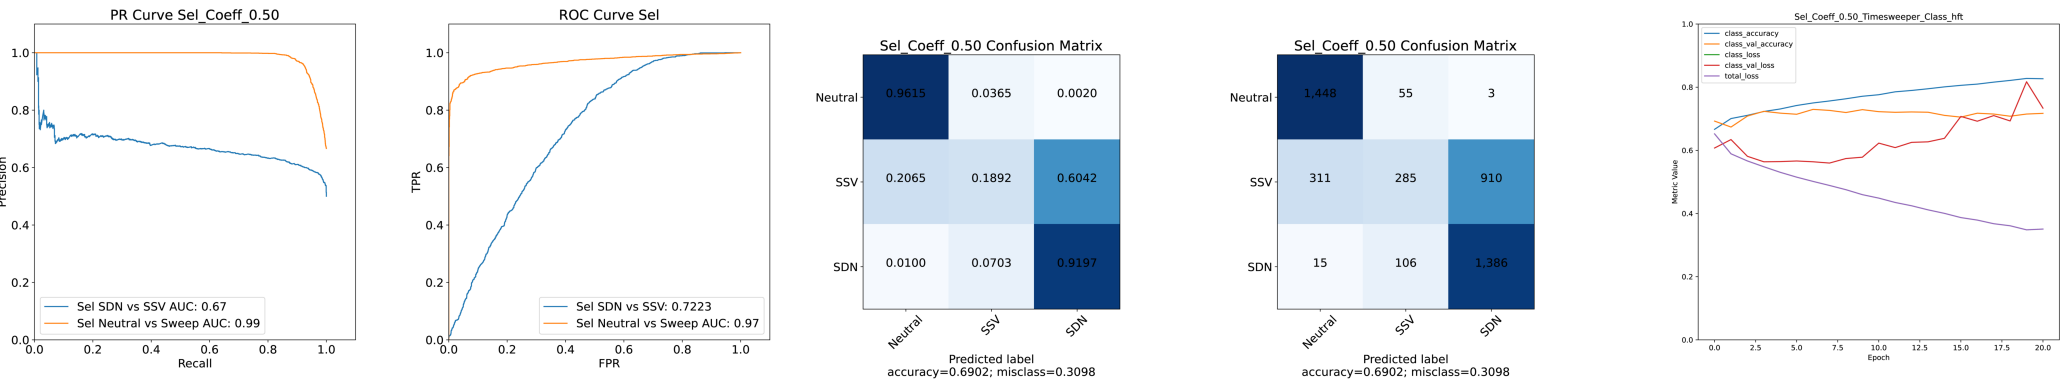

Supplement: Supplementary file 31 [file 1]

## D. simulans AFT Input Data

A.

Neutral

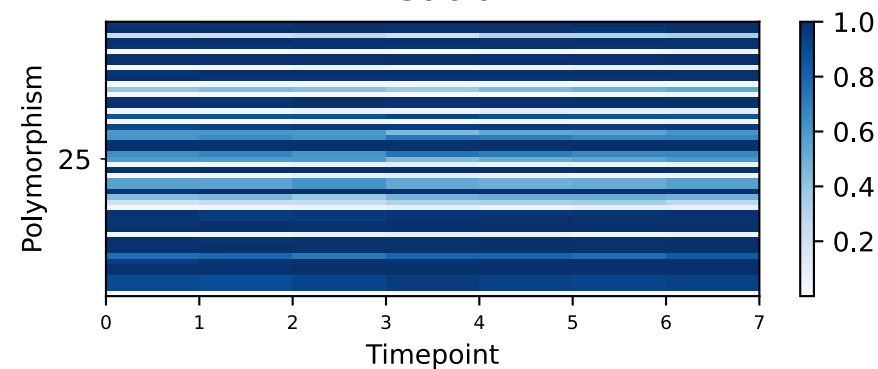

B.

Neutral

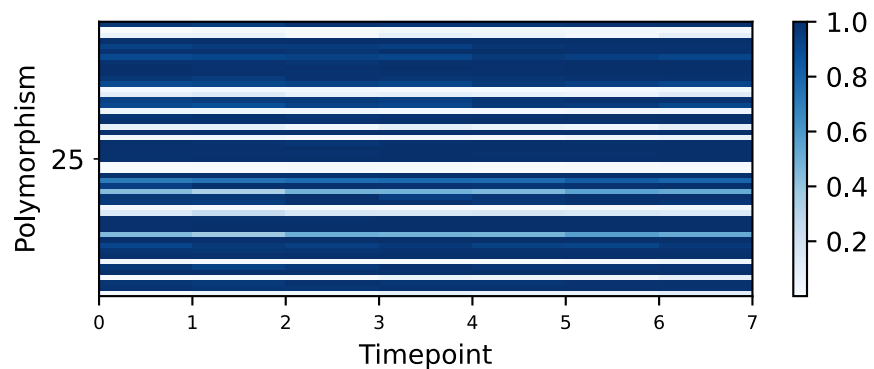

SSV

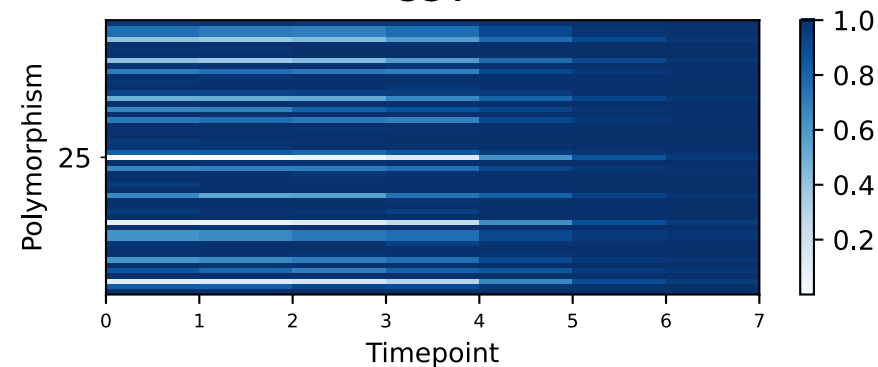

SSV

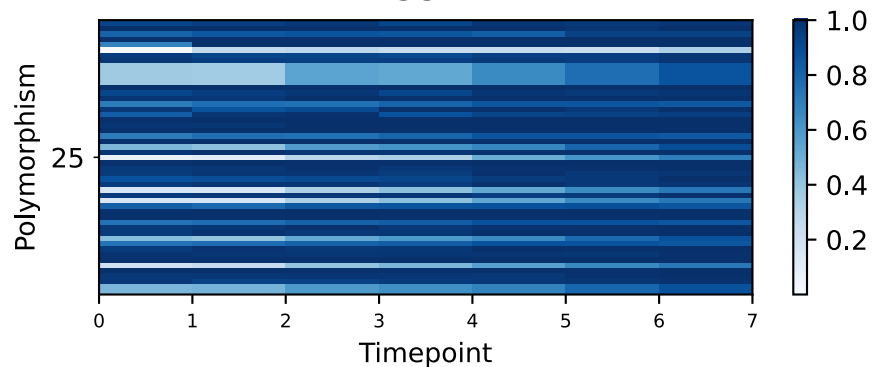

C.

Neutral

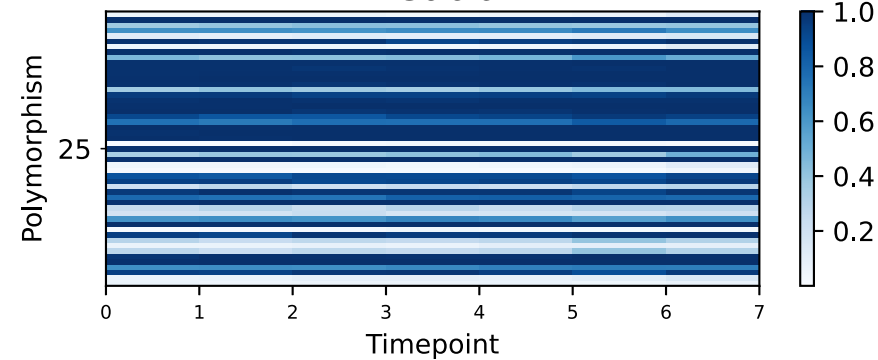

D.

Neutral

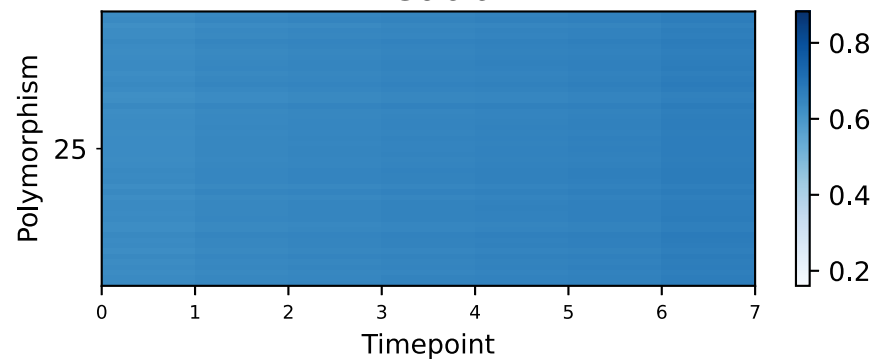

SSV

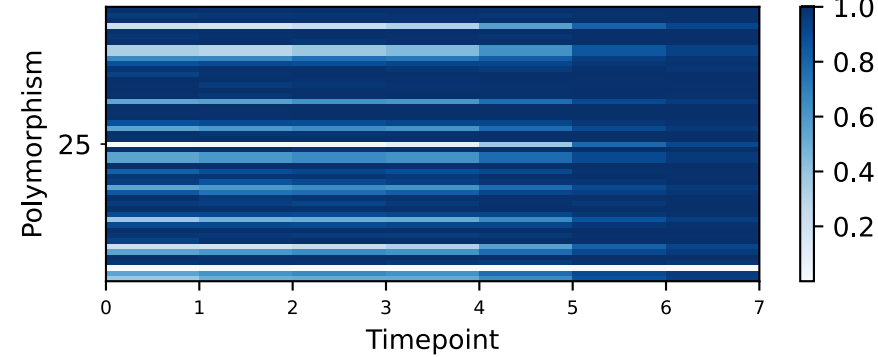

SSV

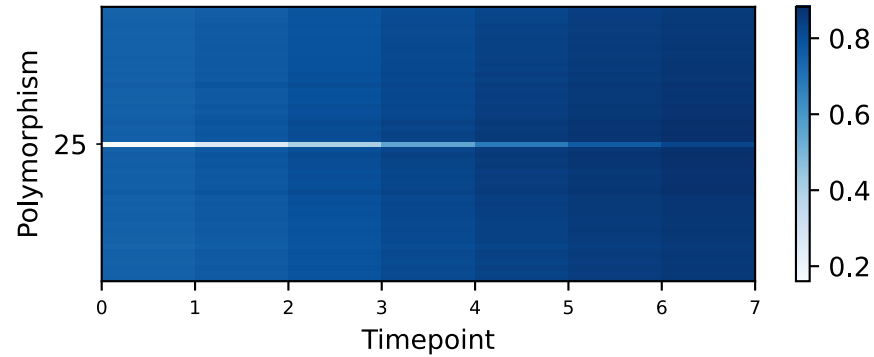

Supplement: Supplementary file 36 [file 1]
